# Supplementary material for: A radical Smiles rearrangement difunctionalization of activated alkenes via desulfonylation and insertion of sulfur dioxide relay strategy
Source: Royal Society of Chemistry journal article supplement (doi:10.1039/d4gc00186a), 2024-01-01

# Supporting Information

## A Radical Smiles Rearrangement Difunctionalization of Activated Alkenes *via* Desulfonylation and Insertion of Sulfur Dioxide Relay Strategy

Si-Wei Tian,<sup>†</sup> Zhen-Tao Luo,<sup>†</sup> Bi-Quan Xiong, Ke-Wen Tang, Peng-Fei Huang,\* Yu

Liu\*

Department of Chemistry and Chemical Engineering, Hunan Institute of Science and  
Technology, Yueyang 414006, China

[phone and fax number: +86073-0864-0122 and E-mail addresses:  
pengfeihuang@whu.edu.cn (Peng-Fei Huang), lyxtmj\_613@163.com (Yu Liu)]

<sup>†</sup> These authors contributed equally to this work

### List of Contents

|                                                                                  |                |
|----------------------------------------------------------------------------------|----------------|
| <b>1. General Information</b>                                                    | <b>S1</b>      |
| <b>2. Experimental Section</b>                                                   | <b>S1-S14</b>  |
| <b>2.1 General Procedure for the Synthesis of Substrates</b>                     | <b>S1</b>      |
| <b>2.2 Typical Experimental Procedure for the Synthesis of Products 3</b>        | <b>S1-S2</b>   |
| <b>2.3 Control Experiments</b>                                                   | <b>S2-S13</b>  |
| <b>2.4 Quenching studies of Ru(bpy)<sub>3</sub>Cl<sub>2</sub> with 1a and 2a</b> | <b>S13-S15</b> |
| <b>2.5 Applications</b>                                                          | <b>S15</b>     |
| <b>3. Characterization Data for All Products</b>                                 | <b>S15-S29</b> |
| <b>4. Reference</b>                                                              | <b>S29</b>     |
| <b>5. Spectra</b>                                                                | <b>S30-S87</b> |

## 1. General Information

Unless otherwise stated, all commercial reagents were used as received. Propiophenone, aldehydes (Innochem, >98%), *o*-Phenylenediamine and Phenylhydrazine hydrochloride were used without further treatment. All reagents and solvents were commercially available and used without any further purification unless specified. All solvents were dried and distilled according to standard procedures. Flash column chromatography was performed using silica gel (0.25mm, 300-400 mesh). Analytical thin-layer chromatography was performed using glass plates pre-coated with 0.25mm 300-400 mesh silica gel impregnated with a fluorescent indicator (254 nm). All reactions were carried out with magnetic stirring and in dried glassware. Nuclear magnetic resonance (NMR) spectra are recorded in parts per million from internal tetramethylsilane on the  $\delta$  scale.  $^1\text{H}$  NMR,  $^{19}\text{F}$  NMR and  $^{13}\text{C}$  NMR spectra were recorded in  $\text{CDCl}_3$  on a Bruker DRX-400 spectrometer operating at 400 MHz, 282 MHz and 100 MHz, respectively. All chemical shift values are quoted in ppm and coupling constants quoted in Hz. The solvent peak was used as a reference value, for  $^1\text{H}$  NMR: TMS = 0.00 ppm, for  $^{13}\text{C}$  NMR:  $\text{CDCl}_3$  = 77.00 ppm. The following abbreviations were used to explain multiplicities: s = singlet, d = doublet, dd = doublet of doublet, t = triplet, td = triplet of doublet, q = quartet, m = multiplet, and br = broad. High-resolution mass spectra (HRMS) were obtained on an Agilent mass spectrometer using ESI-TOF (electrospray ionization-time of flight).

## 2. Experiment Section

### 2.1 General Procedure for the Synthesis of Substrates

*N*-(arylsulfonyl)acrylamide **1**, **4**<sup>[1]</sup> and 4-alkyl-DHPs **2**<sup>[2]</sup> were synthesized according to the known methods.

### 2.2 Typical Experimental Procedure for the Synthesis of Products **3**

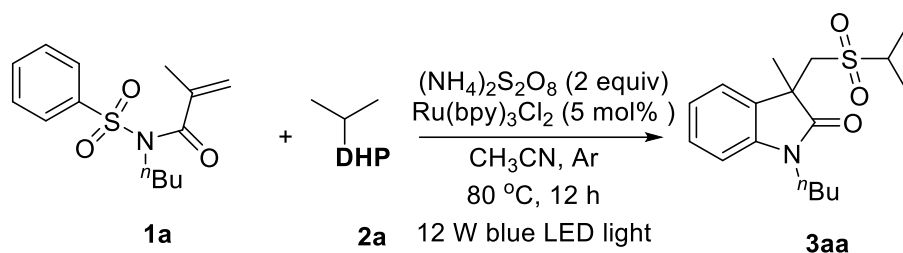

To a Schlenk tube were added **1** (0.2 mmol), **2** (0.4 mmol, 2.0 equiv),  $\text{Ru}(\text{bpy})_3\text{Cl}_2$  (5 mol%),  $(\text{NH}_4)_2\text{S}_2\text{O}_8$  (0.4 mmol, 2.0 equiv), and MeCN (2 mL) at  $80\text{ }^\circ\text{C}$  for 12 h. Until complete consumption of the starting material was observed by TLC and/or GC-MS analysis. After the reaction was finished, the reaction mixture removal of the solvent, the crude product was purified by column chromatography (petroleum ether/ethyl acetate = 2 : 1) to provide the desired products **3**. A scaled-up experiment conducted in the presence of **1a** (1 g, 3.55 mmol), **2a** (2.08 g, 2.0 equiv),  $\text{Ru}(\text{bpy})_3\text{Cl}_2$  (133.12 mg, 5 mol%),  $(\text{NH}_4)_2\text{S}_2\text{O}_8$  (2.0 equiv), and MeCN (50 mL) at  $80\text{ }^\circ\text{C}$  and 12 W blue LED irradiation for 72 h. gave the target product **3aa** in 73% yield.

## 2.3 Control Experiments

### 2.3.1 GC-MS Analysis of Raw Reaction Mixture by Using TEMPO as Radical Inhibitor

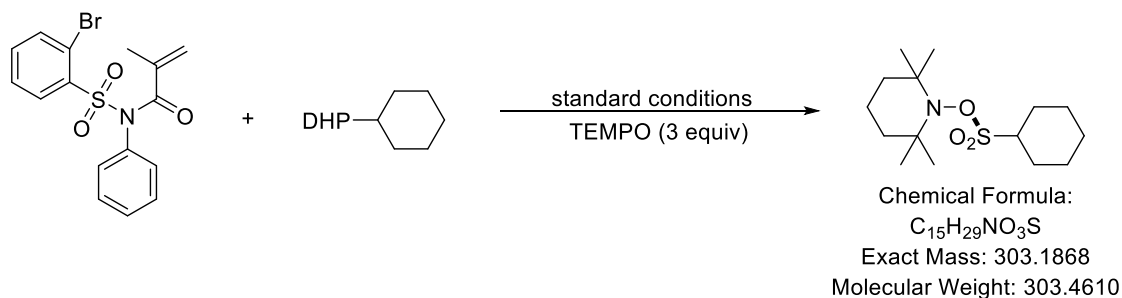

### Spectra of GC-MS

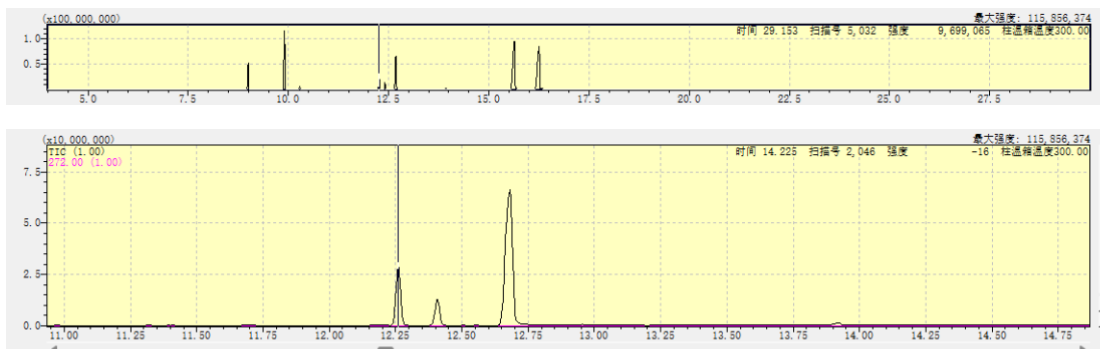

MS spectra of the peak at 12.260 min

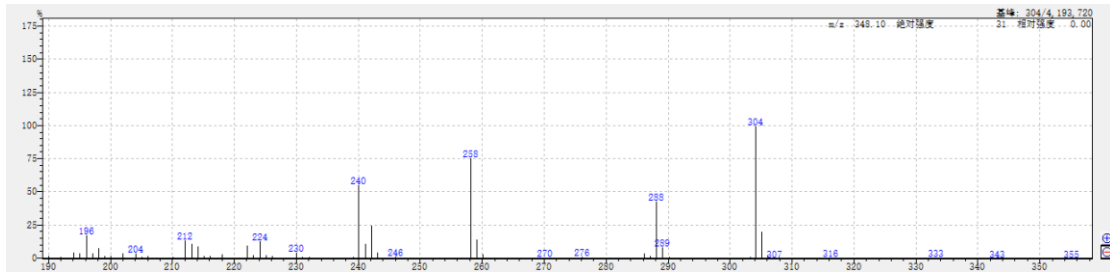

|                     |                                |        |             |        |          |             |
|---------------------|--------------------------------|--------|-------------|--------|----------|-------------|
| [MS Spectrum]       | 76.05                          | 22849  | 0.54        | 112.70 | 65340.16 |             |
| # of Peaks          | 550                            | 77.05  | 268781      | 6.41   | 114.15   | 80810.19    |
| Raw Spectrum        | 12.260 (scan : 1653)           | 78.05  | 86595       | 2.06   | 115.10   | 243385 5.80 |
| Background          | No                             | 79.05  | 165990      | 3.96   | 116.10   | 93689 2.23  |
| Background Spectrum |                                | 80.05  | 34336       | 0.82   | 117.10   | 167996 4.01 |
| Base Peak           | m/z 304.15 (Inten : 4,193,720) | 81.05  | 33052       | 0.79   | 118.10   | 73178 1.74  |
| Event#              | 1                              | 82.05  | 10281       | 0.25   | 119.10   | 50945 1.21  |
| m/z                 | Absolute Intensity             | 83.05  | 31148       | 0.74   | 120.10   | 63153 1.51  |
|                     | Relative Intensity             | 84.05  | 67680.16    |        | 121.10   | 44876 1.07  |
| 50.05               | 10191 0.24                     | 85.00  | 80020.19    |        | 122.10   | 32129 0.77  |
| 51.00               | 56866 1.36                     | 85.95  | 25130.06    |        | 123.10   | 56230.13    |
| 52.05               | 26561 0.63                     | 87.05  | 45840.11    |        | 124.10   | 18500.04    |
| 53.05               | 80663 1.92                     | 88.10  | 65690.16    |        | 125.15   | 11890.03    |
| 54.10               | 31887 0.76                     | 89.05  | 71922 1.71  |        | 126.15   | 45670.11    |
| 55.05               | 241751 5.76                    | 90.10  | 41252 0.98  |        | 127.10   | 57407 1.37  |
| 56.10               | 16158 0.39                     | 91.05  | 274448 6.54 |        | 128.10   | 167438 3.99 |
| 57.05               | 28024 0.67                     | 92.05  | 63653 1.52  |        | 129.10   | 122103 2.91 |
| 58.05               | 34480.08                       | 93.10  | 46313 1.10  |        | 130.10   | 136353 3.25 |
| 59.00               | 60280.14                       | 94.10  | 19991 0.48  |        | 131.10   | 150622 3.59 |
| 60.05               | 834 0.02                       | 95.10  | 12762 0.30  |        | 132.10   | 140097 3.34 |
| 61.05               | 18850.04                       | 96.55  | 34510.08    |        | 133.10   | 72041 1.72  |
| 62.05               | 10400 0.25                     | 97.55  | 38980.09    |        | 134.10   | 111191 2.65 |
| 63.05               | 65218 1.56                     | 98.65  | 58600.14    |        | 135.10   | 24214 0.58  |
| 64.05               | 50417 1.20                     | 99.55  | 22710.05    |        | 136.10   | 12247 0.29  |
| 65.05               | 163339 3.89                    | 100.10 | 24120.06    |        | 137.05   | 32860.08    |
| 66.05               | 39036 0.93                     | 101.10 | 11358 0.27  |        | 138.05   | 29380.07    |
| 67.05               | 184412 4.40                    | 102.10 | 35786 0.85  |        | 139.05   | 70310.17    |
| 68.05               | 23602 0.56                     | 103.10 | 131110 3.13 |        | 140.05   | 11994 0.29  |
| 69.05               | 36788 0.88                     | 104.10 | 78465 1.87  |        | 141.10   | 55857 1.33  |
| 70.05               | 59200.14                       | 105.10 | 106964 2.55 |        | 142.10   | 56058 1.34  |
| 71.05               | 90720.22                       | 106.10 | 97650 2.33  |        | 143.10   | 103172 2.46 |
| 72.05               | 22530.05                       | 107.10 | 54466 1.30  |        | 144.10   | 181199 4.32 |
| 73.05               | 59240.14                       | 108.10 | 30898 0.74  |        | 145.10   | 135905 3.24 |
| 74.05               | 41250.10                       | 109.10 | 11766 0.28  |        | 146.10   | 113386 2.70 |
| 75.00               | 14575 0.35                     | 110.05 | 29220.07    |        | 147.10   | 69508 1.66  |
|                     |                                | 110.75 | 17680.04    |        | 148.05   | 53260 1.27  |
|                     |                                | 111.75 | 23940.06    |        | 149.05   | 17235 0.41  |

|        |        |      |        |          |       |        |          |       |
|--------|--------|------|--------|----------|-------|--------|----------|-------|
| 150.05 | 28862  | 0.69 | 194.05 | 202750   | 4.83  | 238.05 | 28138    | 0.67  |
| 151.05 | 15265  | 0.36 | 195.10 | 177073   | 4.22  | 239.15 | 41101    | 0.98  |
| 152.05 | 22943  | 0.55 | 196.10 | 732614   | 17.47 | 240.10 | 2330660  | 55.58 |
| 153.05 | 45291  | 1.08 | 197.10 | 163754   | 3.90  | 241.10 | 474215   | 11.31 |
| 154.10 | 54020  | 1.29 | 198.05 | 337355   | 8.04  | 242.10 | 1043121  | 24.87 |
| 155.10 | 62538  | 1.49 | 199.05 | 80153    | 1.91  | 243.10 | 179479   | 4.28  |
| 156.05 | 76605  | 1.83 | 200.05 | 86077    | 2.05  | 244.10 | 36732    | 0.88  |
| 157.05 | 71701  | 1.71 | 201.05 | 35603    | 0.85  | 245.10 | 10801    | 0.26  |
| 158.10 | 187238 | 4.46 | 202.05 | 161258   | 3.85  | 246.10 | 49414    | 1.18  |
| 159.10 | 78993  | 1.88 | 203.05 | 31440    | 0.75  | 247.10 | 84470.20 |       |
| 160.05 | 148983 | 3.55 | 204.05 | 162363   | 3.87  | 248.10 | 16324    | 0.39  |
| 161.05 | 57272  | 1.37 | 205.05 | 46917    | 1.12  | 249.10 | 42500.10 |       |
| 162.05 | 61466  | 1.47 | 206.00 | 79732    | 1.90  | 250.15 | 44110.11 |       |
| 163.05 | 52270  | 1.25 | 207.00 | 26886    | 0.64  | 251.10 | 20150.05 |       |
| 164.05 | 29078  | 0.69 | 208.00 | 24644    | 0.59  | 252.10 | 67770.16 |       |
| 165.05 | 18125  | 0.43 | 209.05 | 12625    | 0.30  | 253.05 | 14300.03 |       |
| 166.05 | 12708  | 0.30 | 210.05 | 52820    | 1.26  | 254.05 | 27240.06 |       |
| 167.10 | 38478  | 0.92 | 211.15 | 38711    | 0.92  | 255.05 | 968      | 0.02  |
| 168.10 | 52180  | 1.24 | 212.05 | 570179   | 13.60 | 256.05 | 73050.17 |       |
| 169.10 | 55066  | 1.31 | 213.10 | 461858   | 11.01 | 257.15 | 33098    | 0.79  |
| 170.05 | 100508 | 2.40 | 214.10 | 392263   | 9.35  | 258.10 | 3174721  | 75.70 |
| 171.05 | 119451 | 2.85 | 215.05 | 85825    | 2.05  | 259.10 | 611822   | 14.59 |
| 172.05 | 137581 | 3.28 | 216.05 | 89382    | 2.13  | 260.10 | 129431   | 3.09  |
| 173.05 | 62340  | 1.49 | 217.05 | 28275    | 0.67  | 261.10 | 16786    | 0.40  |
| 174.05 | 92588  | 2.21 | 218.05 | 137342   | 3.27  | 262.10 | 47620.11 |       |
| 175.05 | 30246  | 0.72 | 219.05 | 24921    | 0.59  | 263.15 | 784      | 0.02  |
| 176.05 | 84605  | 2.02 | 220.05 | 38429    | 0.92  | 264.00 | 630      | 0.02  |
| 177.05 | 31708  | 0.76 | 221.15 | 12795    | 0.31  | 265.05 | 401      | 0.01  |
| 178.05 | 44258  | 1.06 | 222.05 | 408347   | 9.74  | 266.10 | 226      | 0.01  |
| 179.05 | 15597  | 0.37 | 223.05 | 99982    | 2.38  | 267.05 | 20400.05 |       |
| 180.05 | 33904  | 0.81 | 224.10 | 557036   | 13.28 | 268.10 | 16063    | 0.38  |
| 181.05 | 83167  | 1.98 | 225.10 | 106084   | 2.53  | 269.15 | 92060.22 |       |
| 182.05 | 61395  | 1.46 | 226.10 | 76898    | 1.83  | 270.15 | 37432    | 0.89  |
| 183.10 | 36262  | 0.86 | 227.10 | 15561    | 0.37  | 271.10 | 75610.18 |       |
| 184.05 | 229898 | 5.48 | 228.10 | 17729    | 0.42  | 272.10 | 16162    | 0.39  |
| 185.10 | 102543 | 2.45 | 229.15 | 79910.19 |       | 273.10 | 32100.08 |       |
| 186.05 | 205902 | 4.91 | 230.05 | 180636   | 4.31  | 274.10 | 30680.07 |       |
| 187.05 | 71736  | 1.71 | 231.05 | 51038    | 1.22  | 275.15 | 26380.06 |       |
| 188.05 | 134300 | 3.20 | 232.05 | 44807    | 1.07  | 276.10 | 61889    | 1.48  |
| 189.05 | 41463  | 0.99 | 233.05 | 25338    | 0.60  | 277.10 | 11289    | 0.27  |
| 190.05 | 93066  | 2.22 | 234.05 | 13520    | 0.32  | 278.20 | 19690.05 |       |
| 191.05 | 33817  | 0.81 | 235.05 | 34200.08 |       | 279.20 | 326      | 0.01  |
| 192.05 | 43339  | 1.03 | 236.05 | 81570.19 |       | 280.00 | 249      | 0.01  |
| 193.15 | 16298  | 0.39 | 237.05 | 16730.04 |       | 281.00 | 26060.06 |       |

|        |          |       |               |                |               |        |          |      |
|--------|----------|-------|---------------|----------------|---------------|--------|----------|------|
| 282.05 | 882      | 0.02  | 299.10        | 86             | 0.00          | 316.20 | 26474    | 0.63 |
| 283.00 | 609      | 0.01  | 300.10        | 708            | 0.02          | 317.15 | 59850.14 |      |
| 284.05 | 787      | 0.02  | 301.10        | 225            | 0.01          | 318.15 | 17184    | 0.41 |
| 285.15 | 42070.10 |       | 302.15        | 31770.08       |               | 319.20 | 32170.08 |      |
| 286.15 | 161919   | 3.86  | <b>303.25</b> | <b>47695</b>   | <b>1.14</b>   | 320.20 | 506      | 0.01 |
| 287.15 | 83210    | 1.98  | <b>304.15</b> | <b>4193720</b> | <b>100.00</b> | 321.20 | 87       | 0.00 |
| 288.15 | 1810871  | 43.18 | <b>305.15</b> | <b>840202</b>  | <b>20.03</b>  | 322.20 | 116      | 0.00 |
| 289.15 | 355479   | 8.48  | 306.15        | 118882         | 2.83          | 323.20 | 74       | 0.00 |
| 290.15 | 45391    | 1.08  | 307.15        | 11842          | 0.28          | 324.20 | 55       | 0.00 |
| 291.10 | 42740.10 |       | 308.20        | 903            | 0.02          | 325.20 | 124      | 0.00 |
| 292.10 | 343      | 0.01  | 309.20        | 238            | 0.01          | 326.20 | 74       | 0.00 |
| 293.10 | 202      | 0.00  | 310.20        | 74             | 0.00          | 327.20 | 254      | 0.01 |
| 294.10 | 97       | 0.00  | 311.20        | 87             | 0.00          | 328.20 | 105      | 0.00 |
| 295.10 | 218      | 0.01  | 312.20        | 102            | 0.00          | 329.20 | 129      | 0.00 |
| 296.10 | 116      | 0.00  | 313.20        | 41             | 0.00          | 330.20 | 92       | 0.00 |
| 297.10 | 47       | 0.00  | 314.15        | 446            | 0.01          | 331.20 | 314      | 0.01 |
| 298.10 | 140      | 0.00  | 315.25        | 11300.03       |               |        |          |      |

### 2.3.2 GC-MS Analysis of Raw Reaction Mixture by Using BHT as Radical Inhibitor

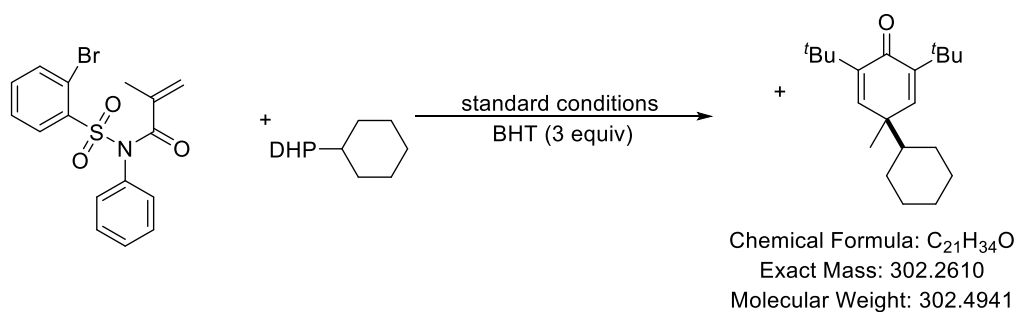

### Spectra of GC-MS

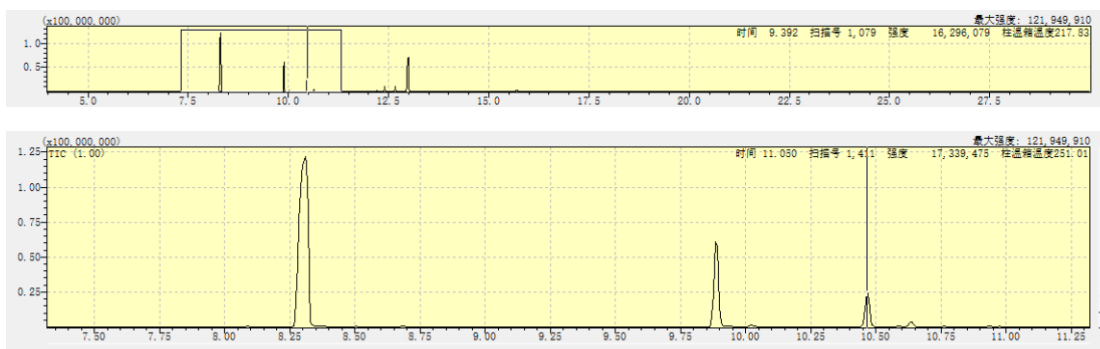

MS spectra of the peak at 10.465 min

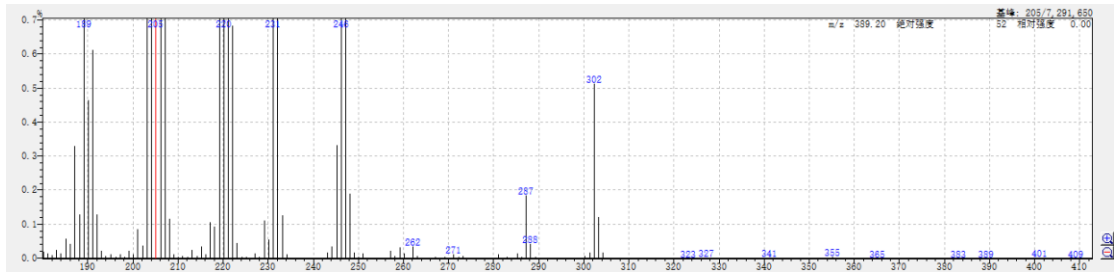

|                               |          |          |          |          |          |          |          |
|-------------------------------|----------|----------|----------|----------|----------|----------|----------|
| [MS Spectrum]                 | 76.05    | 40640.06 | 113.15   | 769      | 0.01     |          |          |
| # of Peaks                    | 546      |          |          |          |          |          |          |
| Raw Spectrum 10.465 (scan :   | 77.05    | 132956   | 1.82     | 114.15   | 18600.03 |          |          |
| 1294)                         | 78.05    | 31795    | 0.44     | 115.10   | 117847   |          |          |
|                               | 79.05    | 142545   | 1.95     | 116.10   | 52514    |          |          |
| Background No                 | 80.10    | 17935    | 0.25     | 117.10   | 85134    |          |          |
| Background Spectrum           | 81.05    | 96496    | 1.32     | 118.15   | 17017    |          |          |
| Base Peak m/z 205.10 (Inten : | 82.15    | 24033    | 0.33     | 119.10   | 222118   |          |          |
| 7,291,650)                    | 83.10    | 833596   | 11.43    | 120.15   | 41041    |          |          |
| Event# 1                      | 84.10    | 59062    | 0.81     | 121.10   | 326831   |          |          |
| m/z Absolute Intensity        | 85.10    | 39830.05 |          | 122.10   | 43183    |          |          |
| Relative Intensity            | 86.05    | 15740.02 |          | 123.10   | 31294    |          |          |
| 50.05                         | 32400.04 | 87.00    | 16360.02 | 124.10   | 34420.05 |          |          |
| 51.00                         | 19468    | 0.27     | 88.05    | 11550.02 | 125.15   | 13450.02 |          |
| 52.05                         | 89460.12 | 89.05    | 79370.11 | 126.15   | 19240.03 |          |          |
| 53.05                         | 110756   | 1.52     | 90.15    | 54670.07 | 127.10   | 31889    |          |
| 54.15                         | 58013    | 0.80     | 91.05    | 276365   | 3.79     | 128.10   | 110518   |
| 55.05                         | 1936465  | 26.56    | 92.10    | 31239    | 0.43     | 129.10   | 118798   |
| 56.15                         | 109802   | 1.51     | 93.10    | 81863    | 1.12     | 130.10   | 67788    |
| 57.10                         | 1589714  | 21.80    | 94.15    | 12997    | 0.18     | 131.10   | 129770   |
| 58.10                         | 73359    | 1.01     | 95.10    | 56473    | 0.77     | 132.10   | 23921    |
| 59.10                         | 94570.13 | 96.15    | 64940.09 | 133.10   | 154428   | 2.12     |          |
| 60.00                         | 644      | 0.01     | 97.10    | 34649    | 0.48     | 134.15   | 36991    |
| 61.00                         | 631      | 0.01     | 98.10    | 29770.04 | 135.10   | 140759   | 1.93     |
| 62.05                         | 996      | 0.01     | 99.15    | 10070.01 | 136.10   | 37236    | 0.51     |
| 63.05                         | 70750.10 | 100.10   | 759      | 0.01     | 137.10   | 41940    | 0.58     |
| 64.15                         | 73180.10 | 101.10   | 22010.03 | 138.10   | 64140.09 |          |          |
| 65.05                         | 69449    | 0.95     | 102.10   | 74040.10 | 139.10   | 35340.05 |          |
| 66.10                         | 14814    | 0.20     | 103.10   | 42710    | 0.59     | 140.15   | 16890.02 |
| 67.05                         | 143637   | 1.97     | 104.15   | 17449    | 0.24     | 141.05   | 70317    |
| 68.10                         | 12385    | 0.17     | 105.10   | 325524   | 4.46     | 142.10   | 44369    |
| 69.05                         | 134366   | 1.84     | 106.10   | 40743    | 0.56     | 143.10   | 49687    |
| 70.10                         | 10071    | 0.14     | 107.10   | 93553    | 1.28     | 144.15   | 27016    |
| 71.05                         | 14538    | 0.20     | 108.10   | 21660    | 0.30     | 145.10   | 253620   |
| 72.05                         | 23820.03 | 109.10   | 50428    | 0.69     | 146.10   | 49418    | 0.68     |
| 73.00                         | 42310.06 | 110.10   | 57800.08 | 147.10   | 91487    | 1.25     |          |
| 74.05                         | 14950.02 | 111.10   | 63990.09 | 148.15   | 28619    | 0.39     |          |
| 75.00                         | 22040.03 | 112.15   | 798      | 0.01     | 149.10   | 267006   | 3.66     |

|        |          |      |        |          |        |        |          |       |
|--------|----------|------|--------|----------|--------|--------|----------|-------|
| 150.10 | 34716    | 0.48 | 194.00 | 542      | 0.01   | 238.20 | 110      | 0.00  |
| 151.10 | 16159    | 0.22 | 195.05 | 946      | 0.01   | 239.20 | 150      | 0.00  |
| 152.10 | 12961    | 0.18 | 196.15 | 439      | 0.01   | 240.20 | 116      | 0.00  |
| 153.05 | 15788    | 0.22 | 197.10 | 850      | 0.01   | 241.20 | 233      | 0.00  |
| 154.10 | 81290.11 |      | 198.10 | 463      | 0.01   | 242.20 | 145      | 0.00  |
| 155.10 | 27390    | 0.38 | 199.15 | 16130.02 |        | 243.15 | 13430.02 |       |
| 156.10 | 23276    | 0.32 | 200.10 | 942      | 0.01   | 244.20 | 25300.03 |       |
| 157.10 | 38124    | 0.52 | 201.05 | 63990.09 |        | 245.25 | 24357    | 0.33  |
| 158.10 | 13898    | 0.19 | 202.15 | 27810.04 |        | 246.15 | 762468   | 10.46 |
| 159.10 | 54602    | 0.75 | 203.10 | 70263    | 0.96   | 247.15 | 150737   | 2.07  |
| 160.15 | 16245    | 0.22 | 204.15 | 71812    | 0.98   | 248.15 | 13932    | 0.19  |
| 161.10 | 232846   | 3.19 | 205.10 | 7291650  | 100.00 | 249.15 | 12980.02 |       |
| 162.10 | 38735    | 0.53 | 206.10 | 1256882  | 17.24  | 250.05 | 296      | 0.00  |
| 163.10 | 142470   | 1.95 | 207.10 | 113626   | 1.56   | 251.05 | 10640.01 |       |
| 164.10 | 57500    | 0.79 | 208.10 | 84740.12 |        | 252.00 | 238      | 0.00  |
| 165.10 | 13343    | 0.18 | 209.05 | 886      | 0.01   | 253.00 | 241      | 0.00  |
| 166.05 | 38830.05 |      | 210.10 | 319      | 0.00   | 254.00 | 58       | 0.00  |
| 167.05 | 31750.04 |      | 211.05 | 512      | 0.01   | 255.00 | 182      | 0.00  |
| 168.10 | 15320.02 |      | 212.15 | 337      | 0.00   | 256.00 | 135      | 0.00  |
| 169.10 | 41740.06 |      | 213.10 | 17830.02 |        | 257.20 | 16140.02 |       |
| 170.10 | 36020.05 |      | 214.15 | 479      | 0.01   | 258.15 | 473      | 0.01  |
| 171.10 | 11871    | 0.16 | 215.10 | 26380.04 |        | 259.20 | 24140.03 |       |
| 172.10 | 10105    | 0.14 | 216.15 | 996      | 0.01   | 260.20 | 11930.02 |       |
| 173.10 | 21644    | 0.30 | 217.10 | 77640.11 |        | 261.20 | 231      | 0.00  |
| 174.05 | 10321    | 0.14 | 218.15 | 68640.09 |        | 262.15 | 25770.04 |       |
| 175.10 | 30769    | 0.42 | 219.15 | 90526    | 1.24   | 263.05 | 569      | 0.01  |
| 176.15 | 11037    | 0.15 | 220.15 | 3069696  | 42.10  | 264.00 | 97       | 0.00  |
| 177.10 | 482687   | 6.62 | 221.15 | 521328   | 7.15   | 265.00 | 263      | 0.00  |
| 178.10 | 71873    | 0.99 | 222.15 | 50010    | 0.69   | 266.00 | 102      | 0.00  |
| 179.10 | 78090.11 |      | 223.10 | 33620.05 |        | 267.05 | 399      | 0.01  |
| 180.15 | 15680.02 |      | 224.10 | 369      | 0.01   | 268.10 | 190      | 0.00  |
| 181.05 | 11470.02 |      | 225.10 | 343      | 0.00   | 269.10 | 338      | 0.00  |
| 182.05 | 796      | 0.01 | 226.20 | 239      | 0.00   | 270.10 | 231      | 0.00  |
| 183.10 | 18070.02 |      | 227.15 | 11990.02 |        | 271.15 | 979      | 0.01  |
| 184.05 | 10300.01 |      | 228.10 | 378      | 0.01   | 272.25 | 352      | 0.00  |
| 185.05 | 41790.06 |      | 229.10 | 81210.11 |        | 273.20 | 522      | 0.01  |
| 186.15 | 31700.04 |      | 230.15 | 40590.06 |        | 274.20 | 194      | 0.00  |
| 187.10 | 24057    | 0.33 | 231.15 | 401195   | 5.50   | 275.20 | 92       | 0.00  |
| 188.15 | 94900.13 |      | 232.10 | 73982    | 1.01   | 276.20 | 50       | 0.00  |
| 189.10 | 196756   | 2.70 | 233.15 | 93240.13 |        | 277.20 | 65       | 0.00  |
| 190.10 | 34036    | 0.47 | 234.15 | 10200.01 |        | 278.20 | 22       | 0.00  |
| 191.10 | 44825    | 0.61 | 235.20 | 185      | 0.00   | 279.20 | 24       | 0.00  |
| 192.10 | 94900.13 |      | 236.20 | 218      | 0.00   | 280.00 | 62       | 0.00  |
| 193.05 | 17310.02 |      | 237.20 | 54       | 0.00   | 281.00 | 839      | 0.01  |



|        |          |      |               |                 |             |        |     |      |
|--------|----------|------|---------------|-----------------|-------------|--------|-----|------|
| 282.00 | 204      | 0.00 | 296.30        | 52              | 0.00        | 311.20 | 102 | 0.00 |
| 283.00 | 342      | 0.00 | 297.30        | 24              | 0.00        | 312.20 | 55  | 0.00 |
| 284.00 | 63       | 0.00 | 298.30        | 66              | 0.00        | 313.20 | 65  | 0.00 |
| 285.20 | 11910.02 |      | 299.30        | 36              | 0.00        | 314.20 | 42  | 0.00 |
| 286.25 | 446      | 0.01 | 300.25        | 602             | 0.01        | 315.20 | 24  | 0.00 |
| 287.25 | 13640    | 0.19 | <b>301.35</b> | <b>13210.02</b> |             | 316.20 | 27  | 0.00 |
| 288.20 | 30730.04 |      | <b>302.25</b> | <b>37577</b>    | <b>0.52</b> | 317.20 | 16  | 0.00 |
| 289.30 | 415      | 0.01 | <b>303.25</b> | <b>89280.12</b> |             | 318.20 | 76  | 0.00 |
| 290.30 | 68       | 0.00 | <b>304.20</b> | <b>12120.02</b> |             | 319.20 | 73  | 0.00 |
| 291.30 | 66       | 0.00 | 305.20        | 142             | 0.00        | 320.20 | 50  | 0.00 |
| 292.30 | 55       | 0.00 | 307.20        | 62              | 0.00        | 321.20 | 42  | 0.00 |
| 293.30 | 76       | 0.00 | 308.20        | 29              | 0.00        | 322.20 | 22  | 0.00 |
| 294.30 | 47       | 0.00 | 309.20        | 19              | 0.00        | 323.20 | 92  | 0.00 |
| 295.30 | 42       | 0.00 | 310.20        | 52              | 0.00        | 324.20 | 38  | 0.00 |

### 2.3.3 GC-MS Analysis of Raw Reaction Mixture by Using 1,1-diphenylethen as Radical Inhibitor

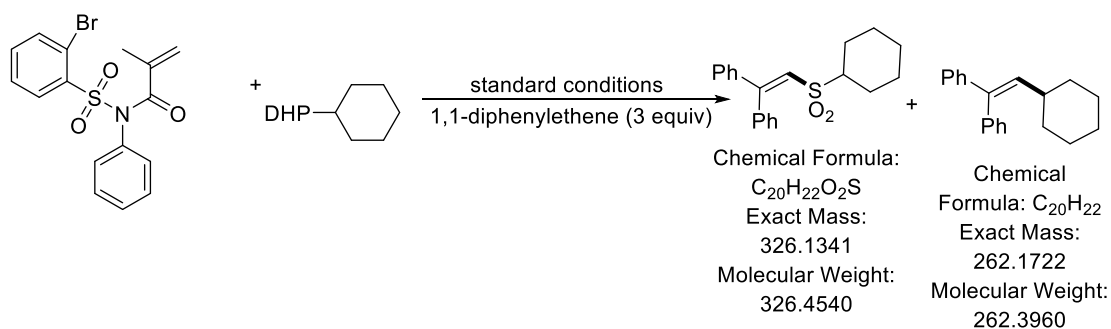

### Spectra of GC-MS

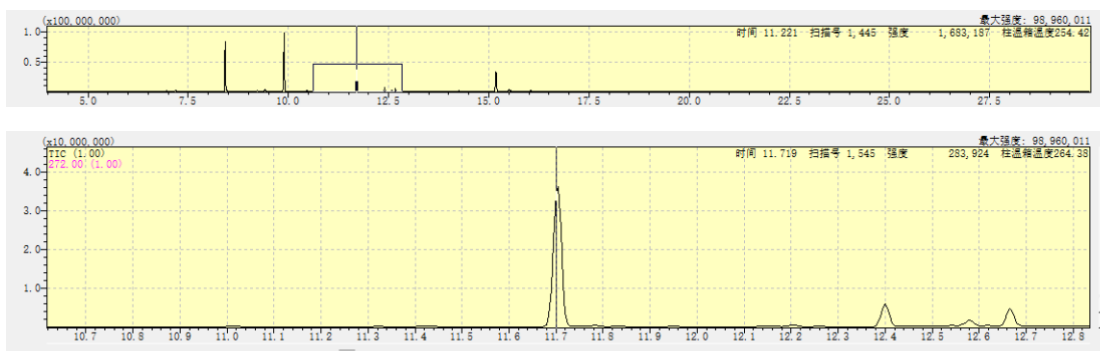

### MS spectra of the peak at 11.705 min

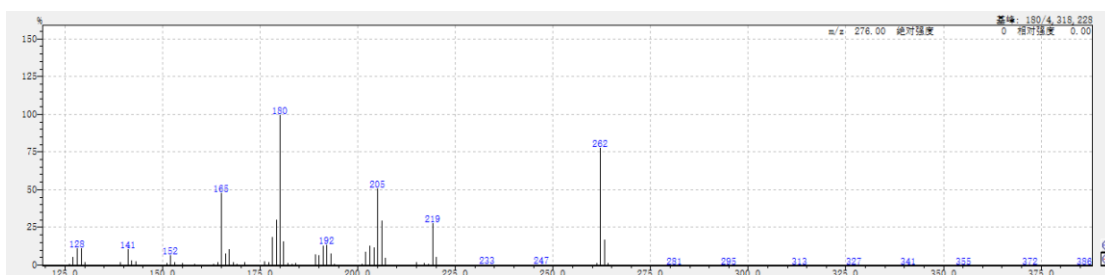

|                               |          |          |        |          |          |        |          |       |
|-------------------------------|----------|----------|--------|----------|----------|--------|----------|-------|
| [MS Spectrum]                 | 76.05    | 104288   | 2.32   | 113.10   | 36951    | 0.82   |          |       |
| # of Peaks                    | 549      | 77.05    | 306675 | 6.81     | 114.15   | 36455  | 0.81     |       |
| Raw Spectrum 11.705 (scan :   | 78.05    | 86529    | 1.92   | 115.10   | 1223575  | 27.17  |          |       |
| 1542)                         | 79.05    | 77603    | 1.72   | 116.10   | 161983   | 3.60   |          |       |
| Background No                 | 80.05    | 20188    | 0.45   | 117.10   | 257210   | 5.71   |          |       |
| Background Spectrum           | 81.10    | 59748    | 1.33   | 118.10   | 27468    | 0.61   |          |       |
| Base Peak m/z 180.10 (Inten : | 82.15    | 53803    | 1.19   | 119.15   | 56680.13 |        |          |       |
| 4,502,721)                    | 83.05    | 30089    | 0.67   | 120.05   | 26440.06 |        |          |       |
| Event# 1                      | 84.05    | 19000.04 |        | 121.05   | 936      | 0.02   |          |       |
| m/z Absolute Intensity        | 85.15    | 943      | 0.02   | 122.10   | 11590.03 |        |          |       |
| Relative Intensity            | 86.05    | 68930.15 |        | 123.05   | 13060.03 |        |          |       |
| 50.05                         | 21293    | 0.47     | 87.05  | 23846    | 0.53     | 124.05 | 13800.03 |       |
| 51.00                         | 129930   | 2.89     | 88.05  | 58191    | 1.29     | 125.10 | 70580.16 |       |
| 52.05                         | 29365    | 0.65     | 89.05  | 197792   | 4.39     | 126.10 | 60465    | 1.34  |
| 53.05                         | 63852    | 1.42     | 90.15  | 49702    | 1.10     | 127.10 | 269548   | 5.99  |
| 54.05                         | 29113    | 0.65     | 91.10  | 2590202  | 57.53    | 128.10 | 553294   | 12.29 |
| 55.05                         | 118907   | 2.64     | 92.10  | 216586   | 4.81     | 129.10 | 534927   | 11.88 |
| 56.10                         | 10878    | 0.24     | 92.80  | 21086    | 0.47     | 130.10 | 101454   | 2.25  |
| 57.10                         | 14153    | 0.31     | 93.85  | 26643    | 0.59     | 131.10 | 34326    | 0.76  |
| 58.05                         | 11960.03 |          | 94.80  | 110071   | 2.44     | 132.10 | 42020.09 |       |
| 59.10                         | 297      | 0.01     | 96.05  | 59659    | 1.32     | 133.10 | 31720.07 |       |
| 60.00                         | 148      | 0.00     | 96.95  | 53160.12 |          | 134.15 | 614      | 0.01  |
| 61.05                         | 11650.03 |          | 98.05  | 59060.13 |          | 135.10 | 898      | 0.02  |
| 62.05                         | 14420    | 0.32     | 99.10  | 74070.16 |          | 136.05 | 436      | 0.01  |
| 63.05                         | 89700    | 1.99     | 100.15 | 27896    | 0.62     | 137.05 | 83870.19 |       |
| 64.05                         | 15636    | 0.35     | 101.10 | 188145   | 4.18     | 138.15 | 85600.19 |       |
| 65.05                         | 158878   | 3.53     | 102.05 | 192861   | 4.28     | 139.05 | 96173    | 2.14  |
| 66.05                         | 18494    | 0.41     | 103.10 | 248590   | 5.52     | 140.15 | 20039    | 0.45  |
| 67.05                         | 112803   | 2.51     | 104.05 | 55637    | 1.24     | 141.10 | 499135   | 11.09 |
| 68.10                         | 82890.18 |          | 105.10 | 73406    | 1.63     | 142.10 | 152078   | 3.38  |
| 69.15                         | 23124    | 0.51     | 105.95 | 11811    | 0.26     | 143.10 | 129698   | 2.88  |
| 70.05                         | 54740.12 |          | 106.95 | 28491    | 0.63     | 144.10 | 23025    | 0.51  |
| 71.00                         | 23860.05 |          | 107.85 | 44446    | 0.99     | 145.10 | 29548    | 0.66  |
| 72.05                         | 276      | 0.01     | 109.00 | 17121    | 0.38     | 146.10 | 36340.08 |       |
| 73.05                         | 25630.06 |          | 110.05 | 16256    | 0.36     | 147.05 | 917      | 0.02  |
| 74.00                         | 17583    | 0.39     | 110.95 | 42470.09 |          | 148.15 | 490      | 0.01  |
| 75.05                         | 41759    | 0.93     | 112.15 | 31100.07 |          | 149.10 | 44470.10 |       |

|        |          |        |        |          |       |               |                |              |
|--------|----------|--------|--------|----------|-------|---------------|----------------|--------------|
| 150.05 | 32566    | 0.72   | 194.05 | 56707    | 1.26  | 238.05        | 410            | 0.01         |
| 151.05 | 86796    | 1.93   | 195.10 | 69160.15 |       | 239.05        | 24850.06       |              |
| 152.05 | 322292   | 7.16   | 196.10 | 16170.04 |       | 240.05        | 986            | 0.02         |
| 153.05 | 103486   | 2.30   | 197.00 | 471      | 0.01  | 241.10        | 10810.02       |              |
| 154.05 | 37861    | 0.84   | 198.05 | 682      | 0.02  | 242.05        | 644            | 0.01         |
| 155.10 | 71306    | 1.58   | 199.05 | 20740.05 |       | 243.15        | 555            | 0.01         |
| 156.10 | 24337    | 0.54   | 200.05 | 26077    | 0.58  | 244.10        | 329            | 0.01         |
| 157.10 | 18953    | 0.42   | 201.05 | 41149    | 0.91  | 245.10        | 26360.06       |              |
| 158.10 | 63206    | 1.40   | 202.05 | 398498   | 8.85  | 246.15        | 929            | 0.02         |
| 159.10 | 11714    | 0.26   | 203.05 | 575878   | 12.79 | 247.10        | 14044          | 0.31         |
| 160.05 | 11260.03 |        | 204.05 | 520462   | 11.56 | 248.20        | 31290.07       |              |
| 161.05 | 21550.05 |        | 205.05 | 2265629  | 50.32 | 249.15        | 540            | 0.01         |
| 162.05 | 77550.17 |        | 206.05 | 1320747  | 29.33 | 250.10        | 703            | 0.02         |
| 163.05 | 63116    | 1.40   | 207.05 | 219146   | 4.87  | 251.10        | 876            | 0.02         |
| 164.15 | 110704   | 2.46   | 208.05 | 30946    | 0.69  | 252.10        | 10860.02       |              |
| 165.05 | 2200130  | 48.86  | 209.05 | 39580.09 |       | 253.05        | 914            | 0.02         |
| 166.05 | 369233   | 8.20   | 210.00 | 593      | 0.01  | 254.05        | 395            | 0.01         |
| 167.05 | 479366   | 10.65  | 210.95 | 10750.02 |       | 255.15        | 470            | 0.01         |
| 168.05 | 94356    | 2.10   | 212.05 | 934      | 0.02  | 256.10        | 14120.03       |              |
| 169.10 | 50358    | 1.12   | 213.05 | 13162    | 0.29  | 257.05        | 521            | 0.01         |
| 170.10 | 16076    | 0.36   | 214.05 | 63660.14 |       | 258.10        | 761            | 0.02         |
| 171.10 | 105642   | 2.35   | 215.05 | 90483    | 2.01  | 259.15        | 11110.02       |              |
| 172.10 | 13929    | 0.31   | 216.05 | 35441    | 0.79  | 260.10        | 80780.18       |              |
| 173.05 | 12870.03 |        | 217.05 | 79502    | 1.77  | <b>261.15</b> | <b>69775</b>   | <b>1.55</b>  |
| 174.05 | 46030.10 |        | 218.15 | 47528    | 1.06  | <b>262.15</b> | <b>3325740</b> | <b>73.86</b> |
| 175.05 | 10532    | 0.23   | 219.10 | 1217953  | 27.05 | <b>263.15</b> | <b>715055</b>  | <b>15.88</b> |
| 176.05 | 119184   | 2.65   | 220.05 | 255557   | 5.68  | <b>264.10</b> | <b>76913</b>   | <b>1.71</b>  |
| 177.10 | 95470    | 2.12   | 221.05 | 30319    | 0.67  | 265.10        | 48870.11       |              |
| 178.05 | 867383   | 19.26  | 222.05 | 28230.06 |       | 266.05        | 540            | 0.01         |
| 179.10 | 1389950  | 30.87  | 223.05 | 489      | 0.01  | 267.00        | 458            | 0.01         |
| 180.10 | 4502721  | 100.00 | 224.05 | 11880.03 |       | 268.00        | 231            | 0.01         |
| 181.05 | 709242   | 15.75  | 225.05 | 14230.03 |       | 269.00        | 222            | 0.00         |
| 182.05 | 61960    | 1.38   | 226.05 | 69810.16 |       | 270.00        | 89             | 0.00         |
| 183.10 | 44039    | 0.98   | 227.00 | 52410.12 |       | 271.00        | 65             | 0.00         |
| 184.10 | 73924    | 1.64   | 228.05 | 88180.20 |       | 272.00        | 46             | 0.00         |
| 185.10 | 31961    | 0.71   | 229.05 | 73550.16 |       | 273.00        | 62             | 0.00         |
| 186.05 | 51390.11 |        | 230.10 | 29450.07 |       | 274.00        | 36             | 0.00         |
| 187.00 | 16967    | 0.38   | 231.10 | 74790.17 |       | 275.00        | 44             | 0.00         |
| 188.05 | 22640    | 0.50   | 232.15 | 57630.13 |       | 276.00        | 38             | 0.00         |
| 189.05 | 340868   | 7.57   | 233.10 | 29631    | 0.66  | 277.20        | 423            | 0.01         |
| 190.05 | 316178   | 7.02   | 234.10 | 10276    | 0.23  | 278.20        | 127            | 0.00         |
| 191.05 | 578711   | 12.85  | 235.00 | 21750.05 |       | 279.20        | 60             | 0.00         |
| 192.05 | 608770   | 13.52  | 236.00 | 436      | 0.01  | 280.00        | 50             | 0.00         |
| 193.05 | 347131   | 7.71   | 236.95 | 499      | 0.01  | 281.05        | 17270.04       |              |

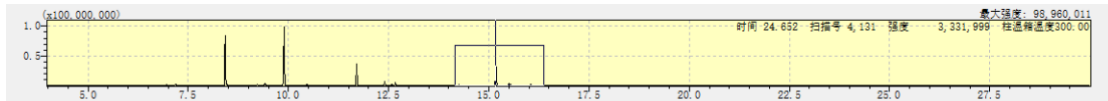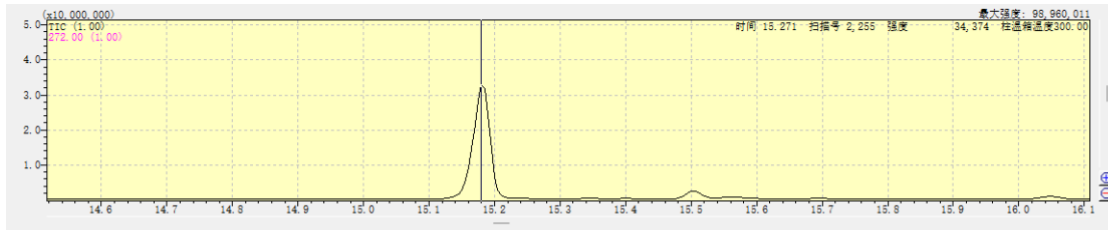

MS spectra of the peak at 15.180 min

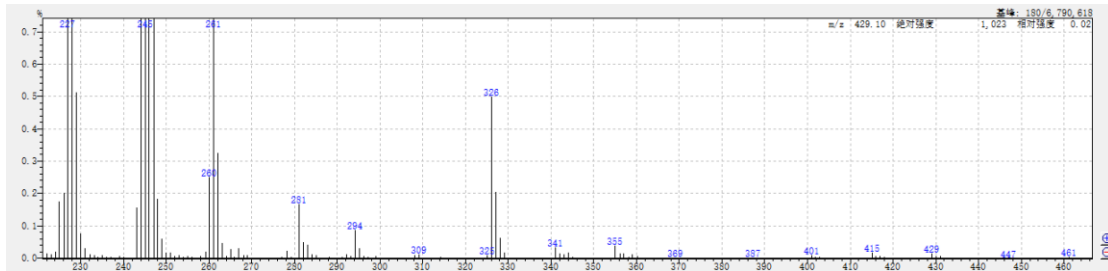

|                                          |          |          |       |          |          |          |          |      |
|------------------------------------------|----------|----------|-------|----------|----------|----------|----------|------|
| [MS Spectrum]                            | 65.05    | 67530    | 0.99  | 91.05    | 80859    | 1.19     |          |      |
| # of Peaks                               | 548      | 66.10    | 19167 | 0.28     | 92.10    | 96470.14 |          |      |
| Raw Spectrum 15.180 (scan : 2237)        | 67.05    | 193819   | 2.85  | 93.05    | 33180.05 |          |          |      |
| Background No                            | 68.05    | 12907    | 0.19  | 94.05    | 18110.03 |          |          |      |
| Background Spectrum                      | 69.05    | 93790.14 |       | 95.05    | 38250.06 |          |          |      |
| Base Peak m/z 180.10 (Inten : 6,790,618) | 69.95    | 23900.04 |       | 96.05    | 72530.11 |          |          |      |
| Event# 1                                 | 71.00    | 35980.05 |       | 97.05    | 10372    | 0.15     |          |      |
| m/z Absolute Intensity                   | 72.05    | 676      | 0.01  | 98.05    | 98500.15 |          |          |      |
| Relative Intensity                       | 73.00    | 10756    | 0.16  | 99.05    | 11218    | 0.17     |          |      |
| 50.05                                    | 50070    | 0.74     | 74.00 | 32782    | 0.48     | 100.05   | 79640.12 |      |
| 51.00                                    | 276577   | 4.07     | 75.05 | 63364    | 0.93     | 101.10   | 26578    | 0.39 |
| 52.05                                    | 52528    | 0.77     | 76.05 | 156709   | 2.31     | 102.05   | 242701   | 3.57 |
| 53.05                                    | 150537   | 2.22     | 77.05 | 339927   | 5.01     | 103.10   | 211782   | 3.12 |
| 54.15                                    | 145178   | 2.14     | 78.05 | 51754    | 0.76     | 104.10   | 22530    | 0.33 |
| 55.05                                    | 3437568  | 50.62    | 79.05 | 91924    | 1.35     | 105.05   | 35665    | 0.53 |
| 56.05                                    | 158178   | 2.33     | 80.10 | 19762    | 0.29     | 106.05   | 35620.05 |      |
| 57.05                                    | 67160.10 |          | 81.05 | 149050   | 2.19     | 107.05   | 11320.02 |      |
| 58.05                                    | 14120.02 |          | 82.15 | 55645    | 0.82     | 108.05   | 26860.04 |      |
| 59.00                                    | 21130.03 |          | 83.10 | 872836   | 12.85    | 109.05   | 35170.05 |      |
| 60.05                                    | 822      | 0.01     | 84.10 | 59588    | 0.88     | 110.05   | 22110.03 |      |
| 61.05                                    | 22550.03 |          | 85.10 | 37620.06 |          | 111.05   | 40860.06 |      |
| 62.05                                    | 15008    | 0.22     | 86.05 | 89640.13 |          | 112.05   | 17810.03 |      |
| 63.05                                    | 73278    | 1.08     | 87.05 | 20802    | 0.31     | 113.05   | 21261    | 0.31 |
| 64.05                                    | 24025    | 0.35     | 88.10 | 25318    | 0.37     | 114.15   | 91760.14 |      |
|                                          |          |          | 89.05 | 82530    | 1.22     | 115.10   | 93841    | 1.38 |
|                                          |          |          | 90.05 | 12597    | 0.19     | 116.10   | 12030    | 0.18 |

|        |          |      |        |          |        |          |          |       |
|--------|----------|------|--------|----------|--------|----------|----------|-------|
| 117.10 | 16023    | 0.24 | 161.00 | 17160.03 | 205.05 | 21715    | 0.32     |       |
| 118.10 | 45270.07 |      | 162.05 | 50520.07 | 206.05 | 74070.11 |          |       |
| 119.05 | 32150.05 |      | 163.05 | 33560    | 0.49   | 207.00   | 54399    | 0.80  |
| 120.05 | 11780.02 |      | 164.15 | 43423    | 0.64   | 208.00   | 34873    | 0.51  |
| 121.00 | 31612    | 0.47 | 165.05 | 785404   | 11.57  | 209.00   | 43308    | 0.64  |
| 122.05 | 44880.07 |      | 166.10 | 167207   | 2.46   | 210.00   | 43169    | 0.64  |
| 123.05 | 31860.05 |      | 167.10 | 1020618  | 15.03  | 211.00   | 51402    | 0.76  |
| 124.15 | 15700.02 |      | 168.05 | 163791   | 2.41   | 212.00   | 18508    | 0.27  |
| 125.10 | 13314    | 0.20 | 169.05 | 20859    | 0.31   | 213.00   | 62020.09 |       |
| 126.05 | 55817    | 0.82 | 170.05 | 27180.04 |        | 214.05   | 11600.02 |       |
| 127.10 | 43903    | 0.65 | 171.00 | 60020.09 |        | 215.00   | 91320.13 |       |
| 128.10 | 54993    | 0.81 | 172.00 | 12070.02 |        | 216.05   | 29050.04 |       |
| 129.10 | 22026    | 0.32 | 173.05 | 16680.02 |        | 217.05   | 68110.10 |       |
| 130.10 | 31590.05 |      | 174.05 | 83640.12 |        | 218.05   | 29880.04 |       |
| 131.10 | 11228    | 0.17 | 175.05 | 24962    | 0.37   | 219.10   | 55620.08 |       |
| 132.10 | 20170.03 |      | 176.05 | 410338   | 6.04   | 220.05   | 11130.02 |       |
| 133.05 | 10451    | 0.15 | 177.10 | 386071   | 5.69   | 221.00   | 28310.04 |       |
| 134.05 | 80621    | 1.19 | 178.05 | 2933916  | 43.21  | 222.05   | 11550.02 |       |
| 135.05 | 12150    | 0.18 | 179.10 | 3471164  | 51.12  | 223.05   | 918      | 0.01  |
| 136.05 | 49580.07 |      | 180.10 | 6790618  | 100.00 | 224.05   | 14370.02 |       |
| 137.05 | 89070.13 |      | 181.05 | 1033243  | 15.22  | 225.00   | 12058    | 0.18  |
| 138.10 | 92260.14 |      | 182.05 | 81559    | 1.20   | 226.05   | 13736    | 0.20  |
| 139.10 | 62522    | 0.92 | 183.05 | 20776    | 0.31   | 227.00   | 480186   | 7.07  |
| 140.05 | 79700.12 |      | 184.00 | 33167    | 0.49   | 228.00   | 103542   | 1.52  |
| 141.05 | 24439    | 0.36 | 185.00 | 79240.12 |        | 229.00   | 34870    | 0.51  |
| 142.10 | 45930.07 |      | 186.00 | 19700.03 |        | 230.00   | 52970.08 |       |
| 143.10 | 68420.10 |      | 187.00 | 10660.02 |        | 231.05   | 21380.03 |       |
| 144.10 | 10280.02 |      | 188.05 | 482      | 0.01   | 232.15   | 843      | 0.01  |
| 145.10 | 67220.10 |      | 189.00 | 73640.11 |        | 233.10   | 762      | 0.01  |
| 146.00 | 14760.02 |      | 190.05 | 65300.10 |        | 234.00   | 343      | 0.01  |
| 147.05 | 55870.08 |      | 191.00 | 26478    | 0.39   | 235.00   | 802      | 0.01  |
| 148.15 | 16750.02 |      | 192.05 | 85600.13 |        | 236.00   | 367      | 0.01  |
| 149.05 | 35777    | 0.53 | 193.05 | 31310    | 0.46   | 237.00   | 297      | 0.00  |
| 150.05 | 72023    | 1.06 | 194.05 | 183952   | 2.71   | 238.00   | 226      | 0.00  |
| 151.05 | 212047   | 3.12 | 195.05 | 1756389  | 25.86  | 238.95   | 528      | 0.01  |
| 152.05 | 568055   | 8.37 | 196.05 | 1230343  | 18.12  | 240.00   | 282      | 0.00  |
| 153.05 | 100429   | 1.48 | 197.05 | 197924   | 2.91   | 241.00   | 212      | 0.00  |
| 154.05 | 10164    | 0.15 | 198.00 | 21617    | 0.32   | 242.00   | 158      | 0.00  |
| 155.05 | 44440.07 |      | 199.00 | 94399    | 1.39   | 243.05   | 10665    | 0.16  |
| 156.05 | 975      | 0.01 | 200.00 | 14204    | 0.21   | 244.05   | 86991    | 1.28  |
| 157.10 | 82760.12 |      | 201.05 | 61250.09 |        | 245.05   | 1084992  | 15.98 |
| 158.10 | 28220.04 |      | 202.05 | 86080.13 |        | 246.00   | 187294   | 2.76  |
| 159.05 | 10840.02 |      | 203.05 | 11508    | 0.17   | 247.05   | 89039    | 1.31  |
| 159.95 | 922      | 0.01 | 204.05 | 11354    | 0.17   | 248.00   | 12574    | 0.19  |

|        |            |  |        |          |               |                   |
|--------|------------|--|--------|----------|---------------|-------------------|
| 249.00 | 41260.06   |  | 285.10 | 738 0.01 | 321.20        | 105 0.00          |
| 250.00 | 11850.02   |  | 286.10 | 230 0.00 | 322.20        | 186 0.00          |
| 251.05 | 12110.02   |  | 287.10 | 177 0.00 | 323.20        | 162 0.00          |
| 251.95 | 592 0.01   |  | 288.10 | 319 0.00 | 324.10        | 74 0.00           |
| 253.00 | 705 0.01   |  | 289.10 | 170 0.00 | 325.15        | 733 0.01          |
| 254.00 | 329 0.00   |  | 290.10 | 71 0.00  | <b>326.10</b> | <b>34076 0.50</b> |
| 255.10 | 457 0.01   |  | 291.10 | 345 0.01 | <b>327.10</b> | <b>13938 0.21</b> |
| 256.00 | 433 0.01   |  | 292.15 | 969 0.01 | <b>328.10</b> | <b>42950.06</b>   |
| 257.00 | 138 0.00   |  | 293.15 | 618 0.01 | 329.15        | 12850.02          |
| 258.05 | 480 0.01   |  | 294.10 | 59270.09 | 330.20        | 210 0.00          |
| 259.15 | 13650.02   |  | 295.10 | 21830.03 | 331.20        | 60 0.00           |
| 260.15 | 17071 0.25 |  | 296.20 | 578 0.01 | 332.20        | 71 0.00           |
| 261.15 | 86070 1.27 |  | 297.20 | 303 0.00 | 333.20        | 170 0.00          |
| 262.10 | 22242 0.33 |  | 298.20 | 68 0.00  | 334.20        | 50 0.00           |
| 263.10 | 32420.05   |  | 299.10 | 518 0.01 | 335.20        | 41 0.00           |
| 264.05 | 498 0.01   |  | 300.10 | 102 0.00 | 336.20        | 134 0.00          |
| 265.00 | 19380.03   |  | 301.10 | 132 0.00 | 337.20        | 82 0.00           |
| 266.00 | 442 0.01   |  | 302.10 | 71 0.00  | 338.20        | 63 0.00           |
| 267.00 | 22680.03   |  | 303.10 | 196 0.00 | 339.20        | 270 0.00          |
| 268.05 | 722 0.01   |  | 304.10 | 94 0.00  | 340.00        | 100 0.00          |
| 269.00 | 786 0.01   |  | 305.10 | 87 0.00  | 341.05        | 23260.03          |
| 270.00 | 266 0.00   |  | 306.10 | 124 0.00 | 342.10        | 10980.02          |
| 271.00 | 202 0.00   |  | 307.10 | 138 0.00 | 343.15        | 956 0.01          |
| 272.00 | 170 0.00   |  | 308.15 | 685 0.01 | 344.15        | 12860.02          |
| 273.00 | 198 0.00   |  | 309.15 | 890 0.01 | 345.15        | 443 0.01          |
| 274.00 | 198 0.00   |  | 310.20 | 214 0.00 | 346.20        | 114 0.00          |
| 275.00 | 263 0.00   |  | 311.20 | 172 0.00 | 347.20        | 177 0.00          |
| 276.00 | 169 0.00   |  | 312.20 | 126 0.00 | 348.20        | 38 0.00           |
| 277.00 | 370 0.01   |  | 313.20 | 212 0.00 | 349.20        | 42 0.00           |
| 278.15 | 16210.02   |  | 314.20 | 282 0.00 | 350.20        | 44 0.00           |
| 279.20 | 454 0.01   |  | 315.20 | 102 0.00 | 351.20        | 22 0.00           |
| 280.00 | 153 0.00   |  | 316.20 | 154 0.00 | 352.20        | 49 0.00           |
| 281.00 | 11369 0.17 |  | 317.20 | 127 0.00 | 353.20        | 198 0.00          |
| 282.05 | 34880.05   |  | 318.20 | 86 0.00  | 354.10        | 183 0.00          |
| 283.00 | 28920.04   |  | 319.20 | 82 0.00  |               |                   |
| 284.05 | 867 0.01   |  | 320.20 | 174 0.00 |               |                   |

## 2.4 Quenching studies of Ru(bpy)<sub>3</sub>Cl<sub>2</sub> with 1a and 2a

**Formulation solution:** *N*-<sup>n</sup>butyl-*N*-(phenylsulfonyl)methacrylamide **1a** (562 mg) was dissolved in CH<sub>3</sub>CN in a 5 mL volumetric flask to set the concentration to be 0.4 M. Diethyl 4-isopropyl-2,6-dimethyl-1,4-dihydropyridine-3,5-dicarboxylate **2a** (590 mg)

was dissolved in CH<sub>3</sub>CN in a 5 mL volumetric flask to set the concentration to be 0.4 M.

**Additional experimental details:** The samples were prepared by the photocatalyst Ru(bpy)<sub>3</sub>Cl<sub>2</sub> (0.01 M) with different amount of quencher **1a** in CH<sub>3</sub>CN in a light path quartz fluorescence cuvette. The concentration of quencher **1a** is 0.4 M in CH<sub>3</sub>CN. For each quenching experiment, 5 μL of quencher solution was separately titrated to the photocatalyst Ru(bpy)<sub>3</sub>Cl<sub>2</sub> (2.0 mL).

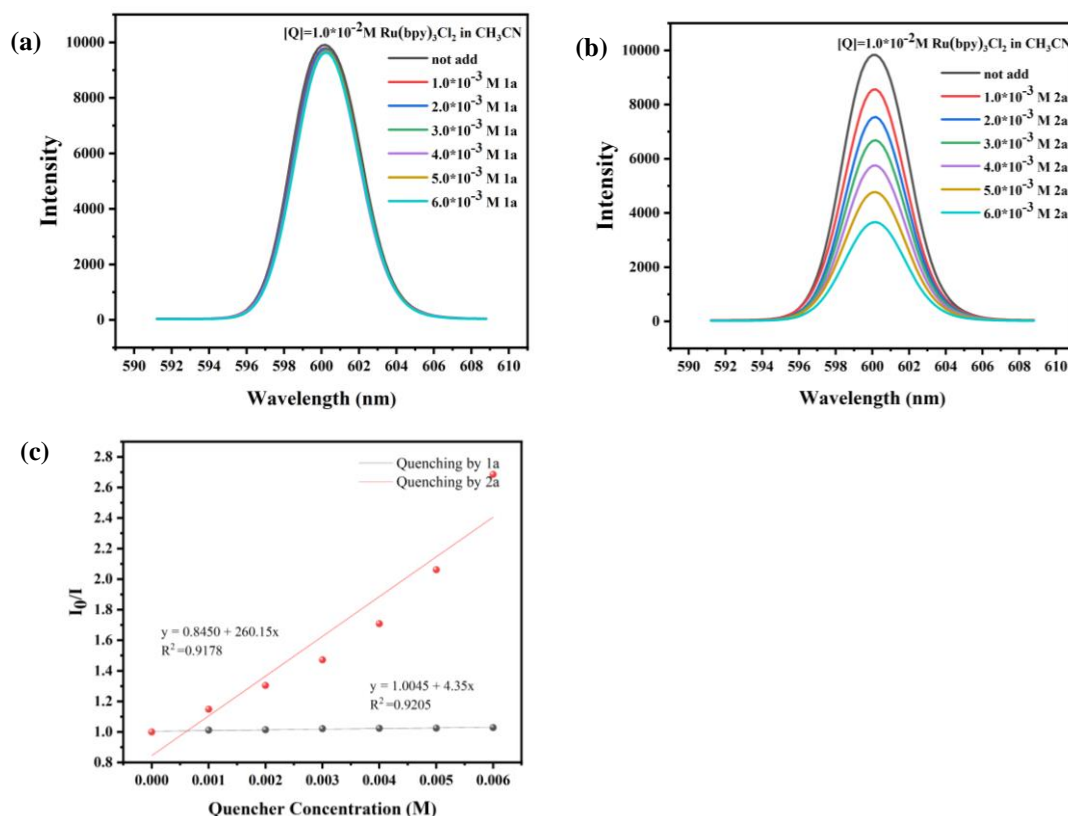

**Figure S1** Stern-Volmer Quenching Experiments: (a) Ru(bpy)<sub>3</sub>Cl<sub>2</sub> (1 × 10<sup>-2</sup> M) quenched by **1a** in CH<sub>3</sub>CN; (b) Ru(bpy)<sub>3</sub>Cl<sub>2</sub> (1 × 10<sup>-2</sup> M) quenched by **2a** in CH<sub>3</sub>CN; (c) Stern-Volmer plot of photocatalyst at different concentration.

The resulting mixture was sparged with nitrogen for 3 minutes and then irradiated at 460 nm. Fluorescence emission spectra were recorded (3 trials per sample). Into this solution, 5.0 μL of **1a** solution was successively added and uniformly stirred, and the resulting mixture was bubbled with nitrogen for 3 minutes and irradiated at 460 nm. Fluorescence emission spectra of 0 μL, 5.0 μL, 10.0 μL, 15.0 μL, 20.0 μL, 25.0 μL,

30.0  $\mu\text{L}$  fluorescence intensity. Follow this method and make changes to the amount to obtain the Stern-Volmer relationship in turn.

Compared the Figure S1 (a) of Stern-Volmer quenching experiments results, the emission intensity of the photocatalyst  $\text{Ru}(\text{bpy})_3\text{Cl}_2$  solution was strongly affected by the gradual increase of the amount of **2a**, and the influence is not observed to **1a**. These indicated that the single electron transfer (SET) process occurred in photocatalyst and 4-isopropyl-2,6-dimethyl-1,4-dihydropyridine-3,5-dicarboxylate.

## 2.5 Applications

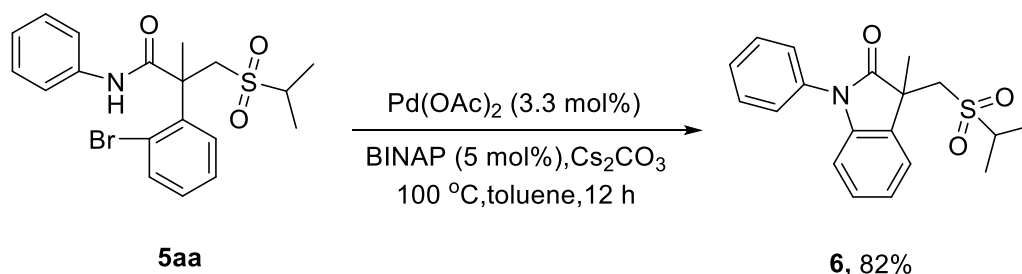

To a Schlenk tube were added  $\text{Pd}(\text{OAc})_2$  (0.67mg, 3.3 mol%) and BINAP (3.11 mg, 5.0 mol%). The reaction vessel was evacuated and flushed with argon. A solution of **5aa** (0.1 mmol, 1.0 equiv) in toluene (0.4 mL) was added *via* cannula. The mixture was heated at 100  $^{\circ}\text{C}$  for 2 min to make a homogeneous solution.  $\text{Cs}_2\text{CO}_3$  (0.14 mmol, 1.4 equiv) and toluene (0.2 mL) were added to the solution. The reaction tube was sealed properly and allowed to heat at 100  $^{\circ}\text{C}$  until all the aryl bromide was consumed (12 h). The reaction mixture was allowed to cool to room temperature and concentrated. By separation and purification, product **6** was obtained at a yield of 82%.

## 3.Characterization Data for All Products

**1-Butyl-3-((isopropylsulfonyl)methyl)-3-methylindolin-2-one (3aa):** Yield: 53.6 mg, 83%; yellow oil;  $^1\text{H}$  NMR (400 MHz,  $\text{CDCl}_3$ )  $\delta$ : 7.42-7.37 (m, 1H), 7.33-7.25 (m, 1H), 7.11-7.02 (m, 1H), 6.91-6.86 (m, 1H), 3.73-3.70 (m, 2H), 3.64-3.59 (m, 1H), 3.49 (d,  $J = 14.0$  Hz, 1H), 2.92-2.81 (m, 1H), 1.70-1.66 (m, 2H), 1.46-1.36 (m, 5H), 1.32-1.24 (m, 6H), 0.95 (t,  $J = 6.2$  Hz, 3H);  $^{13}\text{C}\{^1\text{H}\}$  NMR (100 MHz,  $\text{CDCl}_3$ )  $\delta$ : 177.9, 142.5, 130.6, 128.6, 123.8, 122.1, 108.7, 54.7, 45.1, 40.0, 29.0, 25.4, 20.1, 15.1, 14.9, 13.6; HRMS



(ESI-TOF)  $m/z$ :  $C_{17}H_{26}NO_3S$  ( $M + H$ )<sup>+</sup> calcd for 324.1628, found 324.1631.

**3-((isopropylsulfonyl)methyl)-3-methyl-1-propylindolin-2-one (3ba):** Yield: 49.4 mg, 80%; yellow oil; <sup>1</sup>H NMR (400 MHz, CDCl<sub>3</sub>)  $\delta$ : 7.40 (d,  $J = 7.2$  Hz, 1H), 7.31 (t,  $J = 7.6$  Hz, 1H), 7.11 (t,  $J = 7.6$  Hz, 1H), 6.90 (d,  $J = 7.6$  Hz, 1H), 3.61 (d,  $J = 14.0$  Hz, 1H), 3.48 (d,  $J = 14.0$  Hz, 1H), 3.26 (s, 3H), 2.57-2.49 (m, 1H), 2.09-2.04 (m, 2H), 1.89-1.85 (m, 2H), 1.69-1.67 (m, 1H), 1.46-1.39 (m, 6H), 1.19-1.15 (m, 2H); <sup>13</sup>C{<sup>1</sup>H}NMR (100 MHz, CDCl<sub>3</sub>)  $\delta$ : 178.2, 143.2, 130.3, 128.8, 123.8, 122.4, 108.6, 62.8, 55.1, 45.2, 26.6, 25.1, 24.9, 24.8, 24.7, 24.7; HRMS (ESI-TOF)  $m/z$ :  $C_{16}H_{24}NO_3S$  ( $M + H$ )<sup>+</sup> calcd for 310.1471, found 310.1476.

**1-Cyclohexyl-3-((isopropylsulfonyl)methyl)-3-methylindolin-2-one (3ca):** Yield: 49.6 mg, 71%; yellow oil; <sup>1</sup>H NMR (400 MHz, CDCl<sub>3</sub>)  $\delta$ : 7.41 (d,  $J = 7.2$  Hz, 1H), 7.30 (t,  $J = 7.8$  Hz, 1H), 7.08 (t,  $J = 7.4$  Hz, 1H), 6.90 (d,  $J = 7.6$  Hz, 1H), 3.73 (t,  $J = 7.4$  Hz, 2H), 3.61 (d,  $J = 14.0$  Hz, 1H), 3.48 (d,  $J = 14.0$  Hz, 1H), 2.68-2.60 (m, 1H), 1.73-1.65 (m, 2H), 1.47-1.38 (m, 6H), 1.32-1.26 (m, 4H), 1.00-0.94 (m, 6H); <sup>13</sup>C{<sup>1</sup>H}NMR (100 MHz, CDCl<sub>3</sub>)  $\delta$ : 178.0, 142.6, 130.7, 128.6, 123.9, 122.2, 108.8, 60.9, 55.0, 45.2, 40.1, 29.1, 25.5, 22.1, 21.8, 20.1, 13.7, 12.1, 11.0; HRMS (ESI-TOF)  $m/z$ :  $C_{19}H_{28}NO_3S$  ( $M + H$ )<sup>+</sup> calcd for 350.1784, found 350.1782.

**1-Butyl-3-((isopropylsulfonyl)methyl)-3,6-dimethylindolin-2-one (3da):** Yield: 55.2 mg, 82%; yellow oil; <sup>1</sup>H NMR (400 MHz, CDCl<sub>3</sub>)  $\delta$ : 7.29 (d,  $J = 3.6$  Hz, 1H), 6.90 (d,  $J = 7.6$  Hz, 1H), 6.71 (s, 1H), 3.71 (t,  $J = 7.4$  Hz, 2H), 3.60 (d,  $J = 14.0$  Hz, 1H), 3.46 (d,  $J = 14.0$  Hz, 1H), 2.95-2.87 (m, 1H), 2.39 (s, 3H), 1.73-1.64 (m, 2H), 1.46-1.36 (m, 5H), 1.30 (t,  $J = 7.6$  Hz, 6H), 0.97 (t,  $J = 7.4$  Hz, 3H); <sup>13</sup>C{<sup>1</sup>H}NMR (100 MHz, CDCl<sub>3</sub>)  $\delta$ : 178.3, 142.7, 138.8, 127.6, 123.7, 122.8, 109.7, 54.9, 54.7, 45.0, 40.0, 29.2, 25.6, 21.9, 20.2, 15.3, 14.9, 13.7; HRMS (ESI-TOF)  $m/z$ :  $C_{18}H_{28}NO_3S$  ( $M + H$ )<sup>+</sup> calcd for 338.1784, found 338.1786.

**6-(tert-butyl)-1-butyl-3-((isopropylsulfonyl)methyl)-3-methylindolin-2-one (3ea):** Yield: 63.7 mg, 84%; yellow oil; <sup>1</sup>H NMR (400 MHz, CDCl<sub>3</sub>)  $\delta$ : 7.46 (s, 1H), 7.30 (d,  $J = 8.8$  Hz, 1H), 6.81 (d,  $J = 8.4$  Hz, 1H), 3.71-3.68 (m, 2H), 3.60-3.50 (m, 2H), 2.79 (s, 1H), 1.68-1.62 (m, 2H), 1.47-1.44 (m, 3H), 1.42-1.35 (m, 2H), 1.33-1.30 (m, 9H), 1.28-1.24 (m, 6H), 0.93 (t,  $J = 7.2$  Hz, 3H); <sup>13</sup>C{<sup>1</sup>H}NMR (100 MHz, CDCl<sub>3</sub>)  $\delta$ : 177.9, 145.0, 140.1, 130.1, 124.8, 121.1, 107.9, 54.7, 54.4, 45.3, 39.8, 34.3, 31.3, 29.0, 25.1, 19.9, 15.0, 14.7, 13.5; HRMS (ESI-TOF)  $m/z$ :  $C_{21}H_{34}NO_3S$  ( $M + H$ )<sup>+</sup> calcd for 380.2254, found 380.2251.

**6-Bromo-1-butyl-3-((isopropylsulfonyl)methyl)-3-methylindolin-2-one (3fa):**

Yield: 56.9 mg, 71%; yellow oil;  $^1\text{H}$  NMR (400 MHz,  $\text{CDCl}_3$ )  $\delta$ : 7.24 (d,  $J = 8.0$  Hz, 1H), 7.01 (d,  $J = 8.4$  Hz, 1H), 6.81 (d,  $J = 8.0$  Hz, 1H), 3.98 (d,  $J = 13.6$  Hz, 1H), 3.72 (t,  $J = 7.2$  Hz, 2H), 3.65 (d,  $J = 13.6$  Hz, 1H), 2.97-2.86 (m, 1H), 1.71-1.64 (m, 2H), 1.53 (s, 3H), 1.46-1.36 (m, 2H), 1.31 (d,  $J = 6.8$  Hz, 6H), 0.96 (t,  $J = 7.4$  Hz, 3H).;  $^{13}\text{C}\{^1\text{H}\}$  NMR (100 MHz,  $\text{CDCl}_3$ )  $\delta$ : 177.4, 144.7, 131.2, 129.9, 127.0, 123.1, 107.4, 54.7, 52.8, 45.8, 40.4, 29.0, 22.6, 20.2, 15.2, 15.0, 13.7; HRMS (ESI-TOF)  $m/z$ :  $\text{C}_{17}\text{H}_{25}\text{BrNO}_3\text{S}$  ( $\text{M} + \text{H}$ ) $^+$  calcd for 402.0733, found 402.0736.

**1-Butyl-3-((isopropylsulfonyl)methyl)-3-methyl-6-(trifluoromethyl)indolin-2-one**

**(3ga)**: Yield: 46.9 mg, 60%; yellow oil;  $^1\text{H}$  NMR (400 MHz,  $\text{CDCl}_3$ )  $\delta$ : 7.66 (s, 1H), 7.58 (d,  $J = 8.0$  Hz, 1H), 6.98 (d,  $J = 8.0$  Hz, 1H), 3.76 (t,  $J = 7.8$  Hz, 2H), 3.68 (d,  $J = 14.4$  Hz, 1H), 3.53 (d,  $J = 14.4$  Hz, 1H), 2.95-2.89 (m, 1H), 1.73-1.67 (m, 2H), 1.46 (s, 3H), 1.44-1.36 (m, 2H), 1.34-1.26 (m, 6H), 0.96 (t,  $J = 7.4$  Hz, 3H);  $^{13}\text{C}\{^1\text{H}\}$  NMR (100 MHz,  $\text{CDCl}_3$ )  $\delta$ : 178.0, 145.7, 132.0, 126.2 (q,  $J = 4.0$  Hz, 1C), 124.3 (q,  $J = 270.0$  Hz, 1C), 124.2 (q,  $J = 32.6$  Hz, 1C), 121.0 (q,  $J = 3.7$  Hz, 1C), 108.4, 54.9, 54.3, 45.0, 40.2, 29.1, 25.4, 20.0, 15.1, 14.7, 13.5;  $^{19}\text{F}$  NMR (282 MHz,  $\text{CDCl}_3$ )  $\delta$ : -61.3 (s, 3F); HRMS (ESI-TOF)  $m/z$ :  $\text{C}_{18}\text{H}_{25}\text{F}_3\text{NO}_3\text{S}$  ( $\text{M} + \text{H}$ ) $^+$  calcd for 392.1502, found 392.1504.

**1-Butyl-3-((isopropylsulfonyl)methyl)-3-methyl-2-oxoindoline-6-carbonitrile**

**(3ha)**: Yield: 43.2 mg, 62%; yellow oil;  $^1\text{H}$  NMR (400 MHz,  $\text{CDCl}_3$ )  $\delta$ : 7.50 (d,  $J = 7.6$  Hz, 1H), 7.41 (d,  $J = 8.0$  Hz, 1H), 7.12 (s, 1H), 3.76-3.69 (m, 3H), 3.47 (d,  $J = 14.0$  Hz, 1H), 3.03-2.95 (m, 1H), 1.72-1.66 (m, 2H), 1.46-1.38 (m, 5H), 1.36-1.30 (m, 6H), 0.98 (t,  $J = 7.6$  Hz, 3H);  $^{13}\text{C}\{^1\text{H}\}$  NMR (100 MHz,  $\text{CDCl}_3$ )  $\delta$ : 177.4, 143.5, 136.0, 126.7, 124.7, 118.7, 112.4, 111.3, 55.2, 54.3, 45.3, 40.4, 28.9, 25.4, 20.1, 15.4, 14.7, 13.7; HRMS (ESI-TOF)  $m/z$ :  $\text{C}_{18}\text{H}_{25}\text{N}_2\text{O}_3\text{S}$  ( $\text{M} + \text{H}$ ) $^+$  calcd for 349.1580, found 349.1578.

**1-Butyl-3-((isopropylsulfonyl)methyl)-3,4-dimethylindolin-2-one (3ia)**: Yield: 51.2

mg, 76%; yellow oil;  $^1\text{H}$  NMR (400 MHz,  $\text{CDCl}_3$ )  $\delta$ : 7.22 (d,  $J = 7.2$  Hz, 1H), 7.04 (d,  $J = 7.6$  Hz, 1H), 6.98 (t,  $J = 7.6$  Hz, 1H), 3.96-3.89 (m, 2H), 3.64 (d,  $J = 14.4$  Hz, 1H), 3.45 (d,  $J = 14.0$  Hz, 1H), 2.94-2.86 (m, 1H), 2.53 (s, 3H), 1.74-1.61 (m, 2H), 1.48-1.36 (m, 5H), 1.32-1.25 (m, 6H), 0.97 (t,  $J = 7.4$  Hz, 3H);  $^{13}\text{C}\{^1\text{H}\}$  NMR (100 MHz,  $\text{CDCl}_3$ )  $\delta$ : 178.9, 140.5, 132.7, 131.4, 122.2, 121.6, 119.6, 54.9, 54.8, 44.6, 41.8, 31.3, 26.1, 20.0, 19.0, 15.2, 14.9, 13.8; HRMS (ESI-TOF)  $m/z$ :  $\text{C}_{18}\text{H}_{28}\text{NO}_3\text{S}$  ( $\text{M} + \text{H}$ ) $^+$  calcd for 338.1784, found 338.1781.

**1-Butyl-4-chloro-3-((isopropylsulfonyl)methyl)-3-methylindolin-2-one (3ja)**:

Yield: 55.7 mg, 78%; yellow oil;  $^1\text{H}$  NMR (400 MHz,  $\text{CDCl}_3$ )  $\delta$ : 7.24 (d,  $J = 8.0$  Hz, 1H), 7.01 (d,  $J = 8.0$  Hz, 1H), 6.81 (d,  $J = 8.0$  Hz, 1H), 3.98 (d,  $J = 13.6$  Hz, 1H), 3.72

(t,  $J = 7.8$  Hz, 2H), 3.65 (d,  $J = 13.6$  Hz, 1H), 2.97-2.89 (m, 1H), 1.72-1.64 (m, 2H), 1.53 (s, 3H), 1.46-1.36 (m, 2H), 1.33-1.30 (m, 6H), 0.96 (t,  $J = 7.4$  Hz, 3H);  $^{13}\text{C}\{^1\text{H}\}$ NMR (100 MHz,  $\text{CDCl}_3$ )  $\delta$ : 177.4, 144.7, 131.2, 129.9, 127.0, 123.1, 107.4, 54.7, 52.8, 45.8, 40.4, 29.0, 22.6, 20.2, 15.2, 15.0, 13.7.; HRMS (ESI-TOF)  $m/z$ :  $\text{C}_{17}\text{H}_{25}\text{ClNO}_3\text{S}$  ( $\text{M} + \text{H}$ ) $^+$  calcd for 358.1238, found 358.1233.

**1-Butyl-3-methyl-3-(((pentan-2-yl)sulfonyl)methyl)indolin-2-one (3ab):** Yield: 56.2 mg, 80%; d.r. = 3: 2; yellow oil;  $^1\text{H}$  NMR (400 MHz,  $\text{CDCl}_3$ )  $\delta$ : 7.41 (d,  $J = 7.2$  Hz, 1H), 7.30 (t,  $J = 7.4$  Hz, 1H), 7.08 (t,  $J = 7.6$  Hz, 1H), 6.90 (d,  $J = 7.6$  Hz, 1H), 3.73 (t,  $J = 7.4$  Hz, 2H), 3.63-3.58 (m, 1H), 3.51-3.45 (m, 1H), 2.85-2.68 (m, 1H), 1.91-1.84 (m, 1H), 1.73-1.65 (m, 2H), 1.46-1.37 (m, 6H), 1.32-1.23 (m, 5H), 0.98-0.86 (m, 6H);  $^{13}\text{C}\{^1\text{H}\}$ NMR (100 MHz,  $\text{CDCl}_3$ )  $\delta$ : 178.0, 178.0, 142.7, 142.6, 130.6, 130.6, 128.6, 128.6, 124.0, 123.9, 122.2, 122.2, 108.8, 59.4, 59.1, 54.9, 54.8, 45.2, 40.1, 30.5, 30.4, 29.1, 29.1, 25.5, 25.4, 20.1, 19.7, 13.7, 13.6, 12.7, 12.5; HRMS (ESI-TOF)  $m/z$ :  $\text{C}_{19}\text{H}_{30}\text{NO}_3\text{S}$  ( $\text{M} + \text{H}$ ) $^+$  calcd for 352.1941, found 352.1943.

**3-(((1-(benzo[d][1,3]dioxol-5-yl)propan-2-yl)sulfonyl)methyl)-1-butyl-3-methylindolin-2-one (3ac):** Yield: 61.1 mg, 69%; d.r. = 5: 3; yellow oil;  $^1\text{H}$  NMR (400 MHz,  $\text{CDCl}_3$ )  $\delta$ : 7.44-7.30 (m, 2H), 7.14-7.06 (m, 1H), 6.94-6.90 (m, 1H), 6.73 (d,  $J = 8.0$  Hz, 1H), 6.62-6.53 (m, 2H), 5.94 (s, 2H), 3.74 (t,  $J = 7.4$  Hz, 2H), 3.67-3.59 (m, 1H), 3.52-3.45 (m, 1H), 3.30-3.19 (m, 1H), 3.01-2.84 (m, 1H), 2.50-2.42 (m, 1H), 1.74-1.66 (m, 2H), 1.46-1.39 (m, 5H), 1.21-1.17 (m, 3H), 0.98-0.94 (m, 3H).;  $^{13}\text{C}\{^1\text{H}\}$ NMR (100 MHz,  $\text{CDCl}_3$ )  $\delta$ : 177.9, 177.8, 147.8, 146.5, 142.7, 142.5, 130.6, 130.5, 130.4, 130.3, 128.7, 128.7, 124.0, 123.7, 122.3, 122.2, 109.3, 109.2, 108.9, 108.8, 108.3, 108.3, 101.0, 61.0, 60.8, 55.6, 55.5, 45.3, 40.1, 34.4, 34.0, 29.1, 25.5, 25.4, 20.1, 13.7, 12.4, 12.2; HRMS (ESI-TOF)  $m/z$ :  $\text{C}_{24}\text{H}_{30}\text{NO}_5\text{S}$  ( $\text{M} + \text{H}$ ) $^+$  calcd for 444.1839, found 444.1836.

**1-Butyl-3-((cyclohexylsulfonyl)methyl)-3-methylindolin-2-one (3ad):** Yield: 50.8 mg, 70%; yellow oil;  $^1\text{H}$  NMR (400 MHz,  $\text{CDCl}_3$ )  $\delta$ : 7.40 (d,  $J = 7.6$  Hz, 1H), 7.30 (t,  $J = 7.8$  Hz, 1H), 7.09 (t,  $J = 7.4$  Hz, 1H), 6.90 (d,  $J = 8.0$  Hz, 1H), 3.73 (t,  $J = 7.6$  Hz, 2H), 3.60 (d,  $J = 14.4$  Hz, 1H), 3.47 (d,  $J = 14.4$  Hz, 1H), 2.58-2.53 (m, 1H), 2.09 – 2.05 (m, 2H), 1.90-1.87 (m, 2H), 1.73-1.65 (m, 3H), 1.47-1.38 (m, 7H), 1.21-1.15 (m, 3H), 0.96 (t,  $J = 7.4$  Hz, 3H);  $^{13}\text{C}\{^1\text{H}\}$ NMR (100 MHz,  $\text{CDCl}_3$ )  $\delta$ : 178.0, 142.6, 130.6, 128.6, 123.9, 122.2, 108.8, 62.7, 54.8, 45.2, 40.1, 29.1, 25.4, 24.9, 24.8, 24.7, 20.1, 13.7; HRMS (ESI-TOF)  $m/z$ :  $\text{C}_{20}\text{H}_{30}\text{NO}_3\text{S}$  ( $\text{M} + \text{H}$ ) $^+$  calcd for 364.1941, found 364.1944.

**1-Butyl-3-(((cyclohex-3-en-1-yl)sulfonyl)methyl)-3-methylindolin-2-one (3ae):**

Yield: 52.1 mg, 72%; d.r. = 1: 1; yellow oil;  $^1\text{H}$  NMR (400 MHz,  $\text{CDCl}_3$ )  $\delta$ : 7.41 (d,  $J = 7.6$  Hz, 1H), 7.31 (t,  $J = 8.0$  Hz, 1H), 7.09 (t,  $J = 8.0$  Hz, 1H), 6.90 (d,  $J = 7.6$  Hz, 1H), 5.72- 5.63 (m, 2H), 3.73 (t,  $J = 7.2$  Hz, 2H), 3.65 (d,  $J = 14.0$  Hz, 1H), 3.50 (d,  $J = 14.0$  Hz, 1H), 2.94-2.81 (m, 1H), 2.37-2.32 (m, 2H), 2.20-2.04 (m, 3H), 1.73-1.65 (m, 3H), 1.45-1.38 (m, 5H), 0.96 (t,  $J = 7.4$  Hz, 3H);  $^{13}\text{C}\{^1\text{H}\}$ NMR (100 MHz,  $\text{CDCl}_3$ )  $\delta$ : 177.9, 177.9, 142.6, 142.6, 130.6, 130.5, 128.6, 128.6, 126.7, 126.6, 123.8, 123.8, 123.3, 122.2, 108.8, 108.8, 59.3, 59.3, 55.2, 55.1, 45.2, 45.1, 40.0, 29.1, 25.5, 25.4, 24.2, 24.1, 23.8, 23.8, 21.0, 20.9, 20.1, 13.7; HRMS (ESI-TOF)  $m/z$ :  $\text{C}_{20}\text{H}_{28}\text{NO}_3\text{S}$  ( $\text{M} + \text{H}$ ) $^+$  calcd for 362.1784, found 362.1785.

**1-Butyl-3-((butylsulfonyl)methyl)-3-methylindolin-2-one (3af)**: Yield: 37.1 mg, 55%; yellow oil;  $^1\text{H}$  NMR (400 MHz,  $\text{CDCl}_3$ )  $\delta$ : 7.40 (d,  $J = 7.2$  Hz, 1H), 7.34-7.29 (m, 1H), 7.09 (t,  $J = 7.6$  Hz, 1H), 6.91 (d,  $J = 8.0$  Hz, 1H), 3.91-3.81 (m, 1H), 3.78- 3.70 (m, 1H), 3.61 (d,  $J = 14.0$  Hz, 1H), 3.46 (d,  $J = 14.0$  Hz, 1H), 2.59-2.50 (m, 1H), 2.07 (d,  $J = 14.8$  Hz, 2H), 1.89-1.85 (m, 2H), 1.77-1.66 (m, 2H), 1.44 (s, 5H), 1.31- 1.27 (m, 3H), 1.18-1.05 (m, 4H);  $^{13}\text{C}\{^1\text{H}\}$ NMR (100 MHz,  $\text{CDCl}_3$ )  $\delta$ : 177.7, 142.3, 130.6, 128.7, 123.9, 122.2, 108.7, 62.8, 54.9, 45.1, 34.9, 25.3, 25.0, 25.0, 24.9, 24.7, 24.7, 12.2; HRMS (ESI-TOF)  $m/z$ :  $\text{C}_{18}\text{H}_{28}\text{NO}_3\text{S}$  ( $\text{M} + \text{H}$ ) $^+$  calcd for 338.1784, found 338.1787.

**1-Butyl-3-methyl-3-((pentylsulfonyl)methyl)indolin-2-one (3ag)**: Yield: 33.0 mg, 47%; yellow oil;  $^1\text{H}$  NMR (400 MHz,  $\text{CDCl}_3$ )  $\delta$ : 7.41 (d,  $J = 7.2$  Hz, 1H), 7.31 (t,  $J = 8.4$  Hz, 1H), 7.09 (t,  $J = 7.6$  Hz, 1H), 6.90 (d,  $J = 8.0$  Hz, 1H), 3.76-3.71 (m, 2H), 3.61 (d,  $J = 14.4$  Hz, 1H), 3.50 (d,  $J = 14.0$  Hz, 1H), 3.26-3.13 (m, 1H), 1.99-1.88 (m, 5H), 1.75-1.69 (m, 4H), 1.61-1.57 (m, 3H), 1.45-1.36 (m, 5H), 0.96 (t,  $J = 7.2$  Hz, 3H);  $^{13}\text{C}\{^1\text{H}\}$ NMR (100 MHz,  $\text{CDCl}_3$ )  $\delta$ : 178.0, 142.6, 130.6, 128.6, 123.9, 122.2, 108.8, 63.0, 56.9, 45.3, 40.1, 29.1, 26.6, 26.5, 26.0, 26.0, 25.5, 20.1, 13.7; HRMS (ESI-TOF)  $m/z$ :  $\text{C}_{19}\text{H}_{30}\text{NO}_3\text{S}$  ( $\text{M} + \text{H}$ ) $^+$  calcd for 352.1941, found 352.1943.

**1-Butyl-3-methyl-3-((phenethylsulfonyl)methyl)indolin-2-one (3ah)**: Yield: 53.9 mg, 70%; yellow oil;  $^1\text{H}$  NMR (400 MHz,  $\text{CDCl}_3$ )  $\delta$ : 7.40-7.21 (m, 5H), 7.13 (d,  $J = 6.8$  Hz, 2H), 7.11-7.06 (m, 1H), 6.91 (d,  $J = 8.0$  Hz, 1H), 3.72 (t,  $J = 7.4$  Hz, 2H), 3.60 (d,  $J = 14.8$  Hz, 1H), 3.46 (d,  $J = 14.4$  Hz, 1H), 3.01 (s, 4H), 1.72 -1.63 (m, 2H), 1.44 - 1.39 (m, 5H), 0.96 (t,  $J = 7.4$  Hz, 3H);  $^{13}\text{C}\{^1\text{H}\}$ NMR (100 MHz,  $\text{CDCl}_3$ )  $\delta$ : 177.6, 142.7, 137.4, 130.4, 128.8, 128.8, 128.4, 126.9, 123.6, 122.3, 109.0, 58.6, 56.4, 45.4, 40.1, 29.1, 27.8, 25.3, 20.1, 13.7; HRMS (ESI-TOF)  $m/z$ :  $\text{C}_{22}\text{H}_{28}\text{NO}_3\text{S}$  ( $\text{M} + \text{H}$ ) $^+$  calcd for 386.1784, found 386.1782.

**2-(2-bromophenyl)-3-(isopropylsulfonyl)-2-methyl-N-phenylpropanamide (5aa):**

Yield: 71.9 mg, 85%; white solid; mp 143.5-143.7 °C (uncorrected); <sup>1</sup>H NMR (400 MHz, CDCl<sub>3</sub>) δ: 7.76 (d, *J* = 8.0 Hz, 1H), 7.66 (d, *J* = 8.0 Hz, 1H), 7.50-7.46 (m, 1H), 7.33-7.26 (m, 5H), 7.13-7.09(m, 1H), 6.88(s, 1H), 4.42 (d, *J* = 14.8 Hz, 1H), 3.75 (d, *J* = 14.4 Hz, 1H), 2.76-2.65 (m, 1H), 2.18 (s, 3H), 1.30-1.25 (m, 6H); <sup>13</sup>C{<sup>1</sup>H}NMR (100 MHz, CDCl<sub>3</sub>) δ: 172.5, 137.2, 137.2, 134.8, 131.2, 130.4, 128.9, 128.1, 124.8, 124.5, 120.6, 55.2, 51.9, 50.8, 25.3, 15.4, 14.8; HRMS (ESI-TOF) *m/z*: C<sub>19</sub>H<sub>23</sub>BrNO<sub>3</sub>S(M + H)<sup>+</sup> calcd for 424.0577, found 424.0579.

**2-(2-bromophenyl)-3-(isopropylsulfonyl)-2-methyl-N-(p-tolyl)propanamide**

**(5ba):** Yield: 61.2 mg, 70%; white solid; mp 157.9-158.1 °C (uncorrected); <sup>1</sup>H NMR (400 MHz, CDCl<sub>3</sub>) δ: 7.76 (d, *J* = 8.0 Hz, 1H), 7.66 (d, *J* = 8.0 Hz, 1H), 7.48 (t, *J* = 8.0 Hz, 1H), 7.29 (t, *J* = 7.6 Hz, 1H), 7.20 (d, *J* = 8.4 Hz, 2H), 7.10 (d, *J* = 8.4 Hz, 2H), 6.78 (s, 1H), 4.43 (d, *J* = 14.8 Hz, 1H), 3.75 (d, *J* = 14.4Hz, 1H), 2.78-2.67 (m, 1H), 2.29 (s, 3H), 2.18 (s, 3H), 1.31-1.25 (m, 6H); <sup>13</sup>C{<sup>1</sup>H}NMR (100 MHz, CDCl<sub>3</sub>) δ: 172.7, 137.3, 134.8, 134.6, 131.2, 130.4, 129.(2C), 128.1, 124.6, 120.7, 55.3, 52.0, 50.8, 25.5, 20.8, 15.4, 14.9; HRMS (ESI-TOF) *m/z*: C<sub>20</sub>H<sub>25</sub>BrNO<sub>3</sub>S(M + H)<sup>+</sup> calcd for 438.0733, found 438.0737.

**2-(2-bromophenyl)-N-(4-fluorophenyl)-3-(isopropylsulfonyl)-2-**

**methylpropanamide (5ca):** Yield: 50.3 mg, 57%; white solid; mp 159.4-159.6 °C (uncorrected); <sup>1</sup>H NMR (400 MHz, CDCl<sub>3</sub>) δ: 7.75 (d, *J* = 8.0 Hz, 1H), 7.67 (d, *J* = 8.0 Hz, 1H), 7.48 (t, *J* = 8.0 Hz, 1H), 7.32-7.24 (m, 3H), 6.98 (t, *J* = 8.8 Hz, 2H), 6.88 (s, 1H), 4.39 (d, *J* = 14.8 Hz, 1H), 3.73 (d, *J* = 14.4 Hz, 1H), 2.76 -2.65 (m, 1H), 2.17 (s, 3H), 1.30 -1.24 (m, 6H); <sup>13</sup>C{<sup>1</sup>H}NMR (100 MHz, CDCl<sub>3</sub>) δ: 172.9, 159.7 (d, *J* = 243 Hz, 1C), 137.2, 134.8, 133.1 (d, *J* = 2.9 Hz, 1C), 131.2, 130.5, 128.2, 124.4, 122.8 (d, *J* = 8.0 Hz, 1C), 115.5 (d, *J* = 22.4 Hz, 1C), 55.3, 51.9, 50.7, 25.3, 15.4, 14.8; <sup>19</sup>F NMR (282 MHz, CDCl<sub>3</sub>) δ: -117.1 (s, 1F); HRMS (ESI-TOF) *m/z*: C<sub>19</sub>H<sub>22</sub>BrFNO<sub>3</sub>S(M + H)<sup>+</sup> calcd for 442.0482, found 442.0480.

**2-(2-bromophenyl)-3-(isopropylsulfonyl)-2-methyl-N-(m-tolyl)propanamide**

**(5da):** Yield: 73.4 mg, 84%; white solid; mp 172.2-172.4 °C (uncorrected); <sup>1</sup>H NMR (400 MHz, CDCl<sub>3</sub>) δ: 7.75 (d, *J* = 7.6 Hz, 1H), 7.66 (d, *J* = 8.0 Hz, 1H), 7.48 (t, *J* = 7.6 Hz, 1H), 7.29 (t, *J* = 7.6 Hz, 1H), 7.18- 7.14 (m, 2H), 7.10(d, *J* = 7.6 Hz, 1H), 6.93 (d, *J* = 7.2 Hz, 1H), 6.84 (s, 1H), 4.42(d, *J* = 14.4 Hz, 1H), 3.74 (d, *J* = 14.8 Hz, 1H), 2.76-2.65 (m, 1H), 2.30 (s, 3H), 2.17 (s, 3H), 1.30-1.24 (m, 6H); <sup>13</sup>C{<sup>1</sup>H}NMR (100 MHz, CDCl<sub>3</sub>) δ: 172.7, 138.8, 137.2, 137.1, 134.7, 131.2, 130.4, 128.7, 128.1, 125.6, 124.5,

121.1, 117.6, 55.2, 51.9, 50.8, 25.3, 21.3, 15.4, 14.8; RMS (ESI-TOF)  $m/z$ :  $C_{20}H_{25}BrNO_3S$  (M + H)<sup>+</sup> calcd for 438.0733, found 438.0738.

**2-(2-bromophenyl)-N-(3-bromophenyl)-3-(isopropylsulfonyl)-2-**

**methylpropanamide (5ea):** Yield: 83.6 mg, 83%; white solid; mp 172.2-172.4 °C (uncorrected); <sup>1</sup>H NMR (400 MHz, CDCl<sub>3</sub>) δ: 7.76 (d,  $J$  = 8.0 Hz, 1H), 7.67 (d,  $J$  = 7.6 Hz, 1H), 7.58 (t,  $J$  = 2.0 Hz, 1H), 7.50 (t,  $J$  = 7.6 Hz, 1H), 7.34 -7.29 (m, 1H), 7.24 (d,  $J$  = 9.2 Hz, 2H), 7.17-7.13 (m, 1H), 6.89 (s, 1H), 4.39 (d,  $J$  = 14.4 Hz, 1H), 3.74 (d,  $J$  = 14.4 Hz, 1H), 2.80-2.70 (m, 1H), 2.17 (s, 3H), 1.31 -1.26 (m, 6H); <sup>13</sup>C{<sup>1</sup>H}NMR (100 MHz, CDCl<sub>3</sub>) δ: 172.9, 138.5, 137.0, 134.9, 131.2, 130.6, 130.2, 128.3, 127.8, 124.5, 123.4, 122.5, 119.0, 55.4, 51.9, 51.0, 25.3, 15.4, 14.9; HRMS (ESI-TOF)  $m/z$ :  $C_{19}H_{22}Br_2NO_3S$  (M + H)<sup>+</sup> calcd for 503.9682, found 503.9684.

**2-(2-bromophenyl)-3-(isopropylsulfonyl)-2-methyl-N-(o-tolyl)propanamide(5fa):**

Yield: 39.4 mg, 45%; white solid; mp 141.9-142.1 °C (uncorrected); <sup>1</sup>H NMR (400 MHz, CDCl<sub>3</sub>) δ: 7.81-7.74 (m, 2H), 7.70 (d,  $J$  = 8.0 Hz, 1H), 7.51 (t,  $J$  = 7.6 Hz, 1H), 7.32 (t,  $J$  = 7.6 Hz, 1H), 7.21 (t,  $J$  = 7.6 Hz, 1H), 7.13-7.00 (m, 2H), 6.70 (s, 1H), 4.52 (d,  $J$  = 14.4 Hz, 1H), 3.77 (d,  $J$  = 14.4 Hz, 1H), 2.85-2.74 (m, 1H), 2.23 (s, 3H), 1.92 (s, 3H), 1.33-1.28 (m, 6H); <sup>13</sup>C{<sup>1</sup>H}NMR (100 MHz, CDCl<sub>3</sub>) δ: 172.7, 137.5, 135.1, 134.8, 131.1, 130.5, 130.4, 129.1, 128.3, 126.8, 125.4, 124.7, 122.7, 55.4, 51.8, 51.0, 25.9, 17.0, 15.4, 15.0; HRMS (ESI-TOF)  $m/z$ :  $C_{20}H_{25}BrNO_3S$  (M + H)<sup>+</sup> calcd for 438.0733, found 438.0731.

**2-(2-bromophenyl)-N-(2-chlorophenyl)-3-(isopropylsulfonyl)-2-**

**methylpropanamide (5ga):** Yield: 53.1 mg, 58%; yellow solid; mp 134.5-134.7 °C (uncorrected); <sup>1</sup>H NMR (400 MHz, CDCl<sub>3</sub>) δ: 8.23 (d,  $J$  = 9.2 Hz, 1H), 7.80 (d,  $J$  = 8.0 Hz, 1H), 7.67 (d,  $J$  = 8.0 Hz, 1H), 7.51 (t,  $J$  = 8.0 Hz, 1H), 7.41 (s, 1H), 7.33 -7.26 (m, 3H), 7.03 (t,  $J$  = 7.6 Hz, 1H), 4.51 (d,  $J$  = 14.4 Hz, 1H), 3.75 (d,  $J$  = 14.8 Hz, 1H), 2.78-2.70 (m, 1H), 2.22 (s, 3H), 1.33-1.27 (m, 6H); <sup>13</sup>C{<sup>1</sup>H}NMR (100 MHz, CDCl<sub>3</sub>) δ: 172.8, 136.8, 134.8, 134.1, 131.1, 130.6, 128.9, 128.2, 127.7, 125.0, 124.8, 123.4, 121.5, 55.3, 51.8, 51.3, 25.6, 15.5, 14.9; HRMS (ESI-TOF)  $m/z$ :  $C_{19}H_{22}BrClNO_3S$  (M + H)<sup>+</sup> calcd for 458.0187, found 458.0192.

**3-(isopropylsulfonyl)-2-methyl-N-phenyl-2-(p-tolyl)propanamide (5ha):**

Yield: 44.6 mg, 62%; yellow oil; <sup>1</sup>H NMR (400 MHz, CDCl<sub>3</sub>) δ: 7.39-7.35 (m, 4H), 7.29 (t,  $J$  = 8.0 Hz, 2H), 7.22 (d,  $J$  = 8.0 Hz, 2H), 7.10 (t,  $J$  = 7.2 Hz, 2H), 3.95(d,  $J$  = 14.4 Hz, 1H), 3.53 (d,  $J$  = 14.4 Hz, 1H), 2.87-2.76 (m, 1H), 2.36 (s, 3H), 2.10 (s, 3H), 1.29 (d,  $J$  = 6.8 Hz, 6H); <sup>13</sup>C{<sup>1</sup>H}NMR (100 MHz, CDCl<sub>3</sub>) δ: 172.8, 138.1, 137.3, 137.2, 129.8,

128.9, 126.7, 124.7, 120.3, 57.2, 55.2, 49.8, 22.8, 21.0, 15.3, 15.0; HRMS (ESI-TOF)  $m/z$ :  $C_{20}H_{26}NO_3S$  ( $M + H$ )<sup>+</sup> calcd for 360.1628, found 360.1631.

**3-(isopropylsulfonyl)-2-(4-methoxyphenyl)-2-methyl-N-phenylpropanamide(5ia):**

Yield: 44.3 mg, 59%; yellow oil; <sup>1</sup>H NMR (400 MHz, CDCl<sub>3</sub>) δ: 7.39 (t,  $J = 9.0$  Hz, 4H), 7.29 (t,  $J = 7.8$  Hz, 2H), 7.10 (t,  $J = 7.4$  Hz, 2H), 6.94 (d,  $J = 8.8$  Hz, 2H), 3.92 (d,  $J = 14.4$  Hz, 1H), 3.82 (s, 3H), 3.53 (d,  $J = 14.4$  Hz, 1H), 2.85-2.75 (m, 1H), 2.09 (s, 3H), 1.29 (d,  $J = 6.8$  Hz, 6H); <sup>13</sup>C{<sup>1</sup>H}NMR (100 MHz, CDCl<sub>3</sub>) δ: 173.0, 159.3, 137.3, 131.9, 128.9, 128.1, 124.7, 120.2, 114.3, 57.1, 55.2, 55.1, 49.5, 22.9, 15.3, 15.0; HRMS (ESI-TOF)  $m/z$ :  $C_{20}H_{26}NO_4S$  ( $M + H$ )<sup>+</sup> calcd for 376.1577, found 376.1576.

**2-(4-(tert-butyl)phenyl)-3-(isopropylsulfonyl)-2-methyl-N-phenylpropanamide**

**(5ja):** Yield: 44.1 mg, 55%; white solid; mp 159.4-159.6 °C (uncorrected); <sup>1</sup>H NMR (400 MHz, CDCl<sub>3</sub>) δ: 7.44 -7.38 (m, 6H), 7.29 (t,  $J = 7.8$  Hz, 2H), 7.20 (s, 1H), 7.10 (t,  $J = 7.4$  Hz, 1H), 4.00 (d,  $J = 14.4$  Hz, 1H), 3.48 (d,  $J = 14.4$  Hz, 1H), 2.83- 2.72 (m, 1H), 2.11 (s, 3H), 1.32 (s, 9H), 1.30-1.27 (m, 6H); <sup>13</sup>C{<sup>1</sup>H}NMR (100 MHz, CDCl<sub>3</sub>) δ: 172.5, 151.2, 137.5, 137.3, 128.9, 126.3, 126.0, 124.7, 120.4, 57.5, 55.0, 49.7, 34.5, 31.2, 22.7, 15.2, 15.1; HRMS (ESI-TOF)  $m/z$ :  $C_{23}H_{32}NO_3S$  ( $M + H$ )<sup>+</sup> calcd for 402.2097, found 402.2095.

**2-(4-fluorophenyl)-3-(isopropylsulfonyl)-2-methyl-N-phenylpropanamide (5ka):**

Yield: 37.9 mg, 52%; yellow oil; <sup>1</sup>H NMR (400 MHz, CDCl<sub>3</sub>) δ: 7.50 -7.45 (m, 2H), 7.39 (d,  $J = 7.6$  Hz, 2H), 7.31 (t,  $J = 8.0$  Hz, 2H), 7.15 -7.09 (m, 3H), 7.06 (s, 1H), 3.96 (d,  $J = 14.0$  Hz, 1H), 3.50 (d,  $J = 14.4$  Hz, 1H), 2.97-2.86 (m, 1H), 2.12 (s, 3H), 1.33 (d,  $J = 6.8$  Hz, 6H); <sup>13</sup>C{<sup>1</sup>H}NMR (100 MHz, CDCl<sub>3</sub>) δ: 172.3, 162.4 (d,  $J = 247.2$  Hz, 1C) 137.2, 136.1 (d,  $J = 3.1$  Hz, 1C), 129.0, 128.7(d,  $J = 8.2$  Hz, 1C), 124.9, 120.3, 116.1 (d,  $J = 21.2$  Hz, 1C), 57.1, 55.5, 49.6, 23.0, 15.2 (2C); <sup>19</sup>F NMR (282 MHz, CDCl<sub>3</sub>) δ: -113.3 (s, 1F); HRMS (ESI-TOF)  $m/z$ :  $C_{19}H_{23}FNO_3S$  ( $M + H$ )<sup>+</sup> calcd for 364.1377, found 364.1379.

**2-(4-chlorophenyl)-3-(isopropylsulfonyl)-2-methyl-N-phenylpropanamide (5la):**

Yield: 38.7 mg, 51%; yellow oil; <sup>1</sup>H NMR (400 MHz, CDCl<sub>3</sub>) δ: 7.44- 7.36 (m, 6H), 7.30 (t,  $J = 7.8$  Hz, 2H), 7.14 -7.10 (m, 2H), 3.97 (d,  $J = 14.4$  Hz, 1H), 3.46 (d,  $J = 14.4$  Hz, 1H), 3.00-2.89 (m, 1H), 2.10 (s, 3H), 1.33 (d,  $J = 7.2$  Hz, 6H); <sup>13</sup>C{<sup>1</sup>H}NMR (100 MHz, CDCl<sub>3</sub>) δ: 172.0, 139.0, 137.1, 134.3, 129.2, 129.0, 128.2, 125.0, 120.4, 57.0, 55.5, 49.6, 22.7, 15.2, 15.1; HRMS (ESI-TOF)  $m/z$ :  $C_{19}H_{23}ClNO_3S$  ( $M + H$ )<sup>+</sup> calcd for 380.1082, found 380.1085.

**2-(4-bromophenyl)-3-(isopropylsulfonyl)-2-methyl-N-phenylpropanamide(5ma):**

Yield: 54.1 mg, 64%; yellow oil; <sup>1</sup>H NMR (400 MHz, CDCl<sub>3</sub>) δ: 7.56-7.51 (m, 2H), 7.40-7.34 (m, 4H), 7.32-7.28 (m, 2H), 7.14-7.09 (m, 2H), 3.96 (d, *J* = 14.4 Hz, 1H), 3.45 (d, *J* = 14.4 Hz, 1H), 3.00-2.90 (m, 1H), 2.09 (s, 3H), 1.32 (d, *J* = 6.8 Hz, 6H); <sup>13</sup>C{<sup>1</sup>H}NMR (100 MHz, CDCl<sub>3</sub>) δ: 171.9, 139.5, 137.1, 132.2, 129.0, 128.5, 125.0, 122.4, 120.4, 57.0, 55.5, 49.7, 22.6, 15.2, 15.1; HRMS (ESI-TOF) *m/z*: C<sub>19</sub>H<sub>23</sub>BrNO<sub>3</sub>S (M + H)<sup>+</sup> calcd for 424.0577, found 424.0579.

**3-(isopropylsulfonyl)-2-methyl-N-phenyl-2-(4-**

**(trifluoromethyl)phenyl)propanamide (5na):** Yield: 41.3 mg, 50%; yellow oil; <sup>1</sup>H NMR (400 MHz, CDCl<sub>3</sub>) δ: 7.68-7.60 (m, 4H), 7.42-7.39 (m, 2H), 7.33-7.29 (m, 2H), 7.20 (s, 1H), 7.14-7.11 (m, 1H), 4.00 (d, *J* = 14.0 Hz, 1H), 3.46 (d, *J* = 14.4 Hz, 1H), 3.06-2.97 (m, 1H), 2.14 (s, 3H), 1.36 -1.33 (m, 6H); <sup>13</sup>C{<sup>1</sup>H}NMR (100 MHz, CDCl<sub>3</sub>) δ: 171.5, 144.7, 137.0, 130.3 (q, *J* = 32.6 Hz, 1C), 129.0, 127.1, 126.0 (q, *J* = 3.7 Hz, 1C), 125.1, 123.7 (q, *J* = 270.5 Hz, 1C), 120.6, 57.1, 55.7, 50.0, 22.6, 15.3, 15.0; <sup>19</sup>F NMR (282 MHz, CDCl<sub>3</sub>) δ: -62.7 (s, 3F); HRMS (ESI-TOF) *m/z*: C<sub>20</sub>H<sub>23</sub>F<sub>3</sub>NO<sub>3</sub>S(M + H)<sup>+</sup> calcd for 414.1345, found 414.1350.

**2-(4-cyanophenyl)-3-(isopropylsulfonyl)-2-methyl-N-phenylpropanamide (5oa):**

Yield: 56.2 mg, 76%; white solid; mp 138.2-138.4 °C (uncorrected); <sup>1</sup>H NMR (400 MHz, CDCl<sub>3</sub>) δ: 7.69 (d, *J* = 8.4Hz, 2H), 7.62 (d, *J* = 8.4 Hz, 2H), 7.40 (d, *J* = 8.4 Hz, 2H), 7.32 (t, *J* = 8.0 Hz, 2H), 7.22 (s, 1H), 7.14 (t, *J* = 7.4 Hz, 1H), 4.00 (d, *J* = 14.0 Hz, 1H), 3.46 (d, *J* = 14.0 Hz, 1H), 3.08-3.00 (m, 1H), 2.14 (s, 3H), 1.36-1.33 (m, 6H); <sup>13</sup>C{<sup>1</sup>H}NMR (100 MHz, CDCl<sub>3</sub>) δ: 171.1, 145.9, 136.9, 132.7, 129.0, 127.6, 125.2, 120.5, 118.1, 112.1, 56.8, 55.8, 50.2, 22.4, 15.3, 15.0; HRMS (ESI-TOF) *m/z*: : C<sub>20</sub>H<sub>23</sub>N<sub>2</sub>O<sub>3</sub>S (M + H)<sup>+</sup> calcd for 371.1424 found 371.1421.

**3-(isopropylsulfonyl)-2-methyl-N-phenyl-2-(m-tolyl)propanamide (5pa):**

Yield: 45.2 mg, 63%; white solid; mp 108.9-109.1 °C (uncorrected); <sup>1</sup>H NMR (400 MHz, CDCl<sub>3</sub>) δ: 7.39 (d, *J* = 8.0 Hz, 2H), 7.32-7.26 (m, 5H), 7.17 (d, *J* = 7.2 Hz, 1H), 7.13-7.09 (m, 2H), 4.00-3.95 (m, 1H), 3.53-3.49 (m, 1H), 2.81-2.74 (m, 1H), 2.38 (s, 3H), 2.11 (s, 3H), 1.29 (d, *J* = 6.8 Hz, 6H); <sup>13</sup>C{<sup>1</sup>H}NMR (100 MHz, CDCl<sub>3</sub>) δ: 172.6, 140.3, 138.8, 137.3, 129.0, 129.0, 128.9, 127.4, 124.7, 123.7, 120.3, 57.3, 55.1, 50.0, 22.6, 21.6, 15.3, 15.0; HRMS (ESI-TOF) *m/z*: C<sub>20</sub>H<sub>26</sub>NO<sub>3</sub>S (M + H)<sup>+</sup> calcd for 360.1628, found 360.1633.

**2-(3-chlorophenyl)-3-(isopropylsulfonyl)-2-methyl-N-phenylpropanamide (5qa):**

Yield: 37.1 mg, 49%; white solid; mp 144.3-144.5 °C (uncorrected); <sup>1</sup>H NMR (400



MHz, CDCl<sub>3</sub>)  $\delta$ : 7.49 (s, 1H), 7.43-7.35 (m, 5H), 7.35-7.31 (m, 2H), 7.14 (s, 2H), 4.02 (d,  $J$  = 14.4 Hz, 1H), 3.45 (d,  $J$  = 14.4 Hz, 1H), 3.02-2.93 (m, 1H), 2.13 (s, 3H), 1.37-1.33 (m, 6H); <sup>13</sup>C{<sup>1</sup>H}NMR (100 MHz, CDCl<sub>3</sub>)  $\delta$ : 171.6, 142.7, 137.1, 135.1, 130.3, 129.0, 128.5, 126.9, 125.0, 124.9, 120.5, 57.1, 55.6, 49.9, 22.5, 15.3, 15.1; HRMS (ESI-TOF)  $m/z$ : C<sub>19</sub>H<sub>23</sub>ClNO<sub>3</sub>S (M + H)<sup>+</sup> calcd for 380.1082, found 380.1084.

**3-(isopropylsulfonyl)-2-methyl-N-phenyl-2-(o-tolyl)propanamide (5ra):** Yield: 35.1 mg, 51%; yellow oil; <sup>1</sup>H NMR (400 MHz, CDCl<sub>3</sub>)  $\delta$ : 7.68-7.65 (m, 1H), 7.35-7.28 (m, 6H), 7.24-7.21 (m, 1H), 7.13-7.09 (m, 1H), 6.94 (s, 1H), 3.90 (d,  $J$  = 14.8 Hz, 1H), 3.70 (d,  $J$  = 14.8 Hz, 1H), 2.62-2.54 (m, 1H), 2.33 (s, 3H), 2.15 (s, 3H), 1.26-1.23 (m, 6H); <sup>13</sup>C{<sup>1</sup>H}NMR (100 MHz, CDCl<sub>3</sub>)  $\delta$ : 174.5, 137.4, 137.2, 136.1, 132.3, 129.0 (2C), 128.8, 126.7, 124.8, 120.0, 54.9, 53.2, 49.6, 25.8, 20.6, 15.6, 14.7; HRMS (ESI-TOF)  $m/z$ : C<sub>20</sub>H<sub>26</sub>NO<sub>3</sub>S(M + H)<sup>+</sup> calcd for 360.1628, found 360.1626.

**3-(isopropylsulfonyl)-2-methyl-N,2-diphenylpropanamide (5sa):** Yield: 42.7 mg, 62%; yellow oil; <sup>1</sup>H NMR (400 MHz, CDCl<sub>3</sub>)  $\delta$ : 7.49 (d,  $J$  = 7.2 Hz, 2H), 7.44-7.33 (m, 5H), 7.29 (t,  $J$  = 7.6 Hz, 2H), 7.11 (t,  $J$  = 7.6 Hz, 2H), 3.98 (d,  $J$  = 14.4 Hz, 1H), 3.54 (d,  $J$  = 14.4 Hz, 1H), 2.86-2.75 (m, 1H), 2.12 (s, 3H), 1.35 (d,  $J$  = 6.8 Hz, 6H); <sup>13</sup>C{<sup>1</sup>H}NMR (100 MHz, CDCl<sub>3</sub>)  $\delta$ : 172.5, 140.4, 137.3, 129.1, 128.9, 128.3, 126.8, 124.8, 120.3, 57.3, 55.2, 50.1, 22.7, 15.3, 15.1; HRMS (ESI-TOF)  $m/z$ : C<sub>19</sub>H<sub>24</sub>NO<sub>3</sub>S (M + H)<sup>+</sup> calcd for 346.1471, found 346.1475.

**2-(2-bromophenyl)-3-(isopropylsulfonyl)-N-phenylpropanamide (5ta):** Yield: 42.5 mg, 52%; white solid; mp 145.5-145.7 °C (uncorrected); <sup>1</sup>H NMR (400 MHz, CDCl<sub>3</sub>)  $\delta$ : 7.76 (s, 1H), 7.62 (d,  $J$  = 8.0 Hz, 1H), 7.50-7.44 (m, 3H), 7.35-7.27 (m, 3H), 7.19 (t,  $J$  = 7.6 Hz, 1H), 7.09 (t,  $J$  = 7.4 Hz, 1H), 4.85-4.80 (m, 1H), 4.28-4.21 (m, 1H), 3.24-3.10 (m, 2H), 1.43 (d,  $J$  = 6.8 Hz, 3H), 1.36 (d,  $J$  = 6.8 Hz, 3H); <sup>13</sup>C{<sup>1</sup>H}NMR (100 MHz, CDCl<sub>3</sub>)  $\delta$ : 167.9, 137.4, 136.3, 133.5, 129.8, 129.3, 128.9, 128.5, 124.7, 123.9, 120.1, 54.1, 51.2, 46.3, 15.7, 14.6; HRMS (ESI-TOF)  $m/z$ : C<sub>18</sub>H<sub>21</sub>BrNO<sub>3</sub>S (M + H)<sup>+</sup> calcd for 410.0420, found 410.0423.

**2-(2-bromophenyl)-3-(isopropylsulfonyl)-N,2-diphenylpropanamide (5ua):** Yield: 43.6mg, 45%; yellow oil; <sup>1</sup>H NMR (400 MHz, CDCl<sub>3</sub>)  $\delta$ : 7.69-7.63 (m, 3H), 7.53 (d,  $J$  = 8.0 Hz, 2H), 7.42-7.34 (m, 6H), 7.31 (d,  $J$  = 7.6 Hz, 2H), 7.28-7.23 (m, 1H), 7.12 (t,  $J$  = 7.4 Hz, 1H), 4.66 (d,  $J$  = 15.2 Hz, 1H), 4.51 (d,  $J$  = 15.2 Hz, 1H), 3.21-3.10 (m, 1H), 1.35 (t,  $J$  = 6.8 Hz, 6H); <sup>13</sup>C{<sup>1</sup>H}NMR (100 MHz, CDCl<sub>3</sub>)  $\delta$ : 169.2, 139.2, 138.9, 137.2, 135.8, 133.1, 130.0, 129.0, 128.8, 128.8, 128.0, 127.6, 125.1, 124.8, 120.8, 62.4, 55.7, 55.0, 15.4, 15.2; HRMS (ESI-TOF)  $m/z$ : C<sub>24</sub>H<sub>25</sub>BrNO<sub>3</sub>S (M + H)<sup>+</sup> calcd for

486.0733, found 486.0733.

**3-(isopropylsulfonyl)-2-methyl-N-phenyl-2-(thiophen-2-yl)propanamide(5wa):**

Yield: 36.5 mg, 52%; yellow oil; <sup>1</sup>H NMR (400 MHz, CDCl<sub>3</sub>) δ: 7.59 (s, 1H), 7.42 (d, *J* = 8.4 Hz, 2H), 7.34-7.27 (m, 3H), 7.21-7.18 (m, 1H), 7.11 (t, *J* = 7.2 Hz, 1H), 7.05-7.01 (m, 1H), 4.08 (d, *J* = 14.0 Hz, 1H), 3.47 (d, *J* = 14.0 Hz, 1H), 3.03-2.96 (m, 1H), 2.16 (s, 3H), 1.36-1.33 (m, 6H); <sup>13</sup>C{<sup>1</sup>H}NMR (100 MHz, CDCl<sub>3</sub>) δ: 170.9, 145.0, 137.6, 128.7, 127.2, 125.8, 125.8, 124.8, 120.6, 58.1, 55.3, 47.9, 23.8, 15.2, 14.9; HRMS (ESI-TOF) *m/z*: C<sub>17</sub>H<sub>22</sub>NO<sub>3</sub>S<sub>2</sub> (M + H)<sup>+</sup> calcd for 352.1036, found 352.1041.

**2-(2-bromophenyl)-3-(isopropylsulfonyl)-2-methyl-N-(quinolin-8-**

**yl)propanamide (5xa):** Yield: 46.4 mg, 49%; yellow oil; <sup>1</sup>H NMR (400 MHz, CDCl<sub>3</sub>) δ: 9.68 (s, 1H), 8.65 (d, *J* = 7.6 Hz, 1H), 8.45 (d, *J* = 4.4 Hz, 1H), 8.08 (d, *J* = 8.0 Hz, 1H), 7.89 (d, *J* = 8.0 Hz, 1H), 7.62-7.46 (m, 4H), 7.34-7.29 (m, 2H), 4.58 (d, *J* = 14.4 Hz, 1H), 3.83 (d, *J* = 14.8 Hz, 1H), 2.78-2.67 (m, 1H), 2.29 (s, 3H), 1.34-1.27 (m, 6H); <sup>13</sup>C{<sup>1</sup>H}NMR (100 MHz, CDCl<sub>3</sub>) δ: 173.1, 148.2, 138.6, 137.4, 136.1, 134.6, 134.3, 131.3, 130.2, 128.1, 127.8, 127.2, 124.9, 121.7, 121.5, 116.1, 55.3, 52.2, 51.4, 25.6, 15.6, 14.9; HRMS (ESI-TOF) *m/z*: C<sub>22</sub>H<sub>24</sub>BrN<sub>2</sub>O<sub>3</sub>S (M + H)<sup>+</sup> calcd for 475.0686, found 475.0689.

**2-(2-bromophenyl)-3-(sec-butylsulfonyl)-2-methyl-N-phenylpropanamide (5ab):**

Yield: 69.1 mg, 79%; d.r. = 1: 1; yellow oil; <sup>1</sup>H NMR (400 MHz, CDCl<sub>3</sub>) δ: 7.76 (d, *J* = 6.0 Hz, 1H), 7.67 (d, *J* = 7.6 Hz, 1H), 7.48 (t, *J* = 7.6 Hz, 1H), 7.33-7.27 (m, 5H), 7.11 (t, *J* = 6.6 Hz, 1H), 6.87 (s, 1H), 4.46-4.39 (m, 1H), 3.72 (d, *J* = 14.8 Hz, 1H), 2.41-2.35 (m, 1H), 2.18 (s, 3H), 1.97-1.93 (m, 1H), 1.49-1.37 (m, 1H), 1.29-1.23 (m, 3H), 0.96-0.90 (m, 3H); <sup>13</sup>C{<sup>1</sup>H}NMR (100 MHz, CDCl<sub>3</sub>) δ: 172.8, 137.2, 137.2, 134.8, 134.8, 131.3, 131.2, 130.4, 130.4, 128.9, 128.1, 128.1, 124.8, 124.5, 124.5, 120.6, 61.3, 61.3, 52.2, 52.1, 50.9, 50.8, 25.4, 22.3, 21.6, 12.5, 11.6, 11.1, 11.1; HRMS (ESI-TOF) *m/z*: C<sub>20</sub>H<sub>25</sub>BrNO<sub>3</sub>S (M + H)<sup>+</sup> calcd for 438.0733, found 438.0738.

**3-((1-(benzo[d][1,3]dioxol-5-yl)propan-2-yl)sulfonyl)-2-(2-bromophenyl)-2-**

**methyl-N-phenylpropanamide (5ac):** Yield: 85.8 mg, 74%; d.r. = 1: 1; yellow oil; <sup>1</sup>H NMR (400 MHz, CDCl<sub>3</sub>) δ: 7.79 (t, *J* = 7.8 Hz, 1H), 7.67 (t, *J* = 8.6 Hz, 1H), 7.55-7.47 (m, 1H), 7.34-7.25 (m, 5H), 7.11 (t, *J* = 7.0 Hz, 1H), 6.89 (s, 1H), 6.71 (t, *J* = 9.2 Hz, 1H), 6.56 (d, *J* = 12.0 Hz, 1H), 6.47 (d, *J* = 12.0 Hz, 1H), 5.92 (s, 2H), 4.50-4.44 (m, 1H), 3.80-3.74 (m, 1H), 3.28-3.18 (m, 1H), 2.50-2.34 (m, 2H), 2.20 (s, 3H), 1.16 (t, *J* = 6.6 Hz, 3H); <sup>13</sup>C{<sup>1</sup>H}NMR (100 MHz, CDCl<sub>3</sub>) δ: 172.7, 172.6, 147.8, 147.7, 146.4, 146.4, 137.2, 137.2, 137.1, 134.9, 134.8, 131.4, 131.2, 130.5, 130.5, 130.3, 130.2, 128.9,

128.2, 128.2, 124.8, 124.5, 122.2, 122.2, 120.6, 109.2, 109.1, 108.3, 108.2, 100.9, 100.9, 61.6, 61.1, 52.9, 52.6, 50.9, 50.9, 34.6, 33.6, 25.4, 12.7, 12.0; HRMS (ESI-TOF)  $m/z$ :  $C_{26}H_{27}BrNO_5S$  ( $M + H$ )<sup>+</sup> calcd for 544.0788, found 544.0786.

**2-(2-bromophenyl)-3-(heptan-3-ylsulfonyl)-2-methyl-N-phenylpropanamide**

**(5ad):** Yield: 66.1 mg, 69%; d.r. = 4: 5; yellow oil; <sup>1</sup>H NMR (400 MHz, CDCl<sub>3</sub>) δ: 7.77 (d,  $J = 8.0$  Hz, 1H), 7.67 (d,  $J = 8.0$  Hz, 1H), 7.50 (t,  $J = 7.6$  Hz, 1H), 7.32-7.27 (m, 5H), 7.12 (t,  $J = 6.4$  Hz, 1H), 6.82 (s, 1H), 4.45 (d,  $J = 14.8$  Hz, 1H), 3.71 (d,  $J = 14.8$  Hz, 1H), 2.28-2.25 (m, 1H), 2.19 (s, 3H), 1.85-1.76 (m, 2H), 1.70-1.60 (m, 2H), 1.33-1.25 (m, 4H), 0.99-0.93 (m, 3H), 0.91-0.85 (m, 3H); <sup>13</sup>C{<sup>1</sup>H}NMR (100 MHz, CDCl<sub>3</sub>) δ: 172.9, 172.9, 137.3, 137.2, 134.8, 131.4, 131.4, 130.5, 128.9, 128.2, 124.9, 124.6, 124.6, 120.6, 65.8, 65.7, 53.0, 51.0, 29.7, 29.1, 28.9, 27.1, 26.3, 25.5, 22.7, 22.6, 21.1, 20.4, 13.8, 13.8, 11.3, 11.1; HRMS (ESI-TOF)  $m/z$ :  $C_{23}H_{31}BrNO_3S$  ( $M + H$ )<sup>+</sup> calcd for 480.1203, found 480.1206.

**2-(2-bromophenyl)-3-(cyclopentylsulfonyl)-2-methyl-N-phenylpropanamide (5ae):**

Yield: 55.7 mg, 62%; white solid; mp 135.9-136.1 °C (uncorrected); <sup>1</sup>H NMR (400 MHz, CDCl<sub>3</sub>) δ: 7.78-7.74 (m, 1H), 7.67 (d,  $J = 8.0$  Hz, 1H), 7.49 (t,  $J = 8.0$  Hz, 1H), 7.33-7.27 (m, 5H), 7.11 (t,  $J = 6.6$  Hz, 1H), 6.86 (s, 1H), 4.42 (d,  $J = 14.8$  Hz, 1H), 3.75 (d,  $J = 14.8$  Hz, 1H), 3.00-2.91 (m, 1H), 2.18 (s, 3H), 1.98-1.85 (m, 4H), 1.73-1.68 (m, 2H), 1.59-1.52 (m, 2H); <sup>13</sup>C{<sup>1</sup>H}NMR (100 MHz, CDCl<sub>3</sub>) δ: 172.8, 137.2, 137.2, 134.8, 131.2, 130.5, 128.9, 128.2, 124.8, 124.6, 120.6, 63.3, 54.3, 50.9, 26.9, 26.3, 26.0, 26.0, 25.4; HRMS (ESI-TOF)  $m/z$ :  $C_{21}H_{25}BrNO_3S$  ( $M + H$ )<sup>+</sup> calcd for 450.0733, found 450.0737.

**2-(2-bromophenyl)-3-(cyclohexylsulfonyl)-2-methyl-N-phenylpropanamide (5af):**

Yield: 65.7 mg, 71%; white solid; mp 137.1-137.3 °C (uncorrected); <sup>1</sup>H NMR (400 MHz, CDCl<sub>3</sub>) δ: 7.76 (d,  $J = 8.0$  Hz, 1H), 7.67 (d,  $J = 8.0$  Hz, 1H), 7.49 (t,  $J = 7.6$  Hz, 1H), 7.32-7.26 (m, 5H), 7.12 (t,  $J = 7.0$  Hz, 1H), 6.88 (s, 1H), 4.41 (d,  $J = 14.8$  Hz, 1H), 3.70 (d,  $J = 14.8$  Hz, 1H), 2.29-2.22 (t,  $J = 12.2$  Hz, 1H), 2.17 (s, 3H), 2.09-2.00 (m, 2H), 1.85 (d,  $J = 3.6$  Hz, 2H), 1.47-1.32 (m, 2H), 1.26 (s, 1H), 1.16-1.05 (m, 3H); <sup>13</sup>C{<sup>1</sup>H}NMR (100 MHz, CDCl<sub>3</sub>) δ: 172.8, 137.3, 137.2, 134.8, 131.3, 130.4, 128.9, 128.2, 124.8, 124.6, 120.6, 63.0, 52.2, 50.8, 25.4, 25.4, 25.1, 24.9, 24.9, 24.2; HRMS (ESI-TOF)  $m/z$ :  $C_{22}H_{27}BrNO_3S$  ( $M + H$ )<sup>+</sup> calcd for 464.0890, found 464.0887.

**2-(2-bromophenyl)-3-(cyclohex-3-en-1-ylsulfonyl)-2-methyl-N-**

**phenylpropanamide (5ag):** Yield: 60.9 mg, 66%; d.r. = 1: 1; white solid; mp 169.5-169.7 °C (uncorrected); <sup>1</sup>H NMR (400 MHz, CDCl<sub>3</sub>) δ: 7.77 (d,  $J = 8.0$  Hz, 1H), 7.69-

7.65 (m, 1H), 7.50 (t,  $J = 7.6$  Hz, 1H), 7.33-7.27 (m, 5H), 7.14-7.10 (m, 1H), 6.84 (d,  $J = 6.8$  Hz, 1H), 5.67-5.59 (m, 2H), 4.45 (t,  $J = 15.0$  Hz, 1H), 3.79-3.73 (m, 1H), 2.69-2.50 (m, 1H), 2.42-2.25 (m, 2H), 2.28-2.19 (m, 4H), 2.04-1.98 (m, 1H), 1.67-1.59 (m, 2H);  $^{13}\text{C}\{^1\text{H}\}$ NMR (100 MHz,  $\text{CDCl}_3$ )  $\delta$ : 172.7, 137.3, 137.2, 137.2, 134.9, 131.3, 131.2, 130.6, 130.5, 128.9, 128.3, 128.2, 126.7, 126.6, 124.9, 124.6, 124.6, 123.5, 123.3, 120.6, 59.8, 59.5, 52.7, 52.5, 50.9, 50.9, 25.5, 24.4, 24.3, 23.4, 21.5, 20.5; HRMS (ESI-TOF)  $m/z$ :  $\text{C}_{22}\text{H}_{25}\text{BrNO}_3\text{S}$  ( $\text{M} + \text{H}$ ) $^+$  calcd for 462.0733, found 462.0735.

**2-(2-bromophenyl)-3-((1-(2-(tert-butoxy)acetyl)piperidin-4-yl)sulfonyl)-2-methyl-N-phenylpropanamide (5ah)**: Yield: 89.1 mg, 79%; yellow oil;  $^1\text{H}$  NMR (400 MHz,  $\text{CDCl}_3$ )  $\delta$ : 7.78 (d,  $J = 6.4$  Hz, 1H), 7.69 (d,  $J = 7.6$  Hz, 1H), 7.51 (t,  $J = 7.6$  Hz, 1H), 7.35-7.28 (m, 5H), 7.15-7.11 (m, 1H), 6.80 (s, 1H), 4.44 (d,  $J = 15.2$  Hz, 1H), 4.21 (s, 2H), 3.74 (d,  $J = 14.8$  Hz, 1H), 2.54 (s, 2H), 2.39 (t,  $J = 12.4$  Hz, 1H), 2.19 (s, 3H), 2.02-1.90 (m, 2H), 1.65-1.59 (m, 2H), 1.44 (s, 9H);  $^{13}\text{C}\{^1\text{H}\}$ NMR (100 MHz,  $\text{CDCl}_3$ )  $\delta$ : 172.6, 154.2, 137.2, 137.1, 135.0, 131.3, 130.7, 129.0, 128.4, 125.0, 124.6, 120.6, 80.1, 61.1, 52.7, 50.9, 42.2, 28.3, 25.5, 24.9, 23.8; HRMS (ESI-TOF)  $m/z$ :  $\text{C}_{27}\text{H}_{36}\text{BrN}_2\text{O}_5\text{S}$ ( $\text{M} + \text{H}$ ) $^+$  calcd for 579.1523, found 579.1526.

**2-(2-bromophenyl)-3-(ethylsulfonyl)-2-methyl-N-phenylpropanamide (5ai)**: Yield: 54.0 mg, 66%; yellow oil;  $^1\text{H}$  NMR (400 MHz,  $\text{CDCl}_3$ )  $\delta$ : 7.77 (d,  $J = 8.0$  Hz, 1H), 7.68 (d,  $J = 8.4$  Hz, 1H), 7.51 (t,  $J = 7.8$  Hz, 1H), 7.35-7.27 (m, 5H), 7.14-7.09 (m, 1H), 6.81 (s, 1H), 4.45 (d,  $J = 15.2$  Hz, 1H), 3.79 (d,  $J = 15.2$  Hz, 1H), 2.60-2.41 (m, 2H), 2.18 (s, 3H), 1.24 (t,  $J = 7.4$  Hz, 3H);  $^{13}\text{C}\{^1\text{H}\}$ NMR (100 MHz,  $\text{CDCl}_3$ )  $\delta$ : 172.6, 137.1, 137.1, 135.0, 131.3, 130.7, 128.9, 128.4, 124.9, 124.6, 120.7, 55.3, 50.9, 49.4, 25.4, 6.3; HRMS (ESI-TOF)  $m/z$ :  $\text{C}_{18}\text{H}_{21}\text{BrNO}_3\text{S}$ ( $\text{M} + \text{H}$ ) $^+$  calcd for 410.0420, found 410.0425.

**2-(2-bromophenyl)-2-methyl-N-phenyl-3-(propylsulfonyl)propanamide (5aj)**: Yield: 46.5 mg, 55%; yellow oil;  $^1\text{H}$  NMR (400 MHz,  $\text{CDCl}_3$ )  $\delta$ : 7.78 (d,  $J = 7.6$  Hz, 1H), 7.69 (d,  $J = 8.0$  Hz, 1H), 7.52 (t,  $J = 7.8$  Hz, 1H), 7.35-7.28 (m, 5H), 7.12 (t,  $J = 6.6$  Hz, 1H), 6.80 (s, 1H), 4.45 (d,  $J = 15.2$  Hz, 1H), 3.77 (d,  $J = 14.8$  Hz, 1H), 2.51-2.34 (m, 2H), 2.18 (s, 3H), 1.78-1.68 (m, 2H), 0.91 (t,  $J = 7.4$  Hz, 3H);  $^{13}\text{C}\{^1\text{H}\}$ NMR (100 MHz,  $\text{CDCl}_3$ )  $\delta$ : 172.6, 137.2, 137.2, 135.0, 131.4, 130.7, 129.0, 128.4, 124.9, 124.7, 120.6, 56.7, 55.9, 50.9, 25.4, 15.5, 13.0; HRMS (ESI-TOF)  $m/z$ :  $\text{C}_{19}\text{H}_{23}\text{BrNO}_3\text{S}$ ( $\text{M} + \text{H}$ ) $^+$  calcd for 424.0577, found 424.0580.

**2-(2-bromophenyl)-3-(butylsulfonyl)-2-methyl-N-phenylpropanamide (5ak)**: Yield: 51.6 mg, 59%; yellow oil;  $^1\text{H}$  NMR (400 MHz,  $\text{CDCl}_3$ )  $\delta$ : 7.78 (d,  $J = 8.0$  Hz,

1H), 7.69 (d,  $J = 8.0$  Hz, 1H), 7.52 (t,  $J = 7.6$  Hz, 1H), 7.35-7.28 (m, 5H), 7.14-7.10 (m, 1H), 6.79 (s, 1H), 4.46 (d,  $J = 15.2$  Hz, 1H), 3.77 (d,  $J = 15.2$  Hz, 1H), 2.52-2.34 (m, 2H), 2.18 (s, 3H), 1.71-1.63 (m, 2H), 1.33-1.25 (m, 2H), 0.84 (t,  $J = 7.4$  Hz, 3H);  $^{13}\text{C}\{^1\text{H}\}$ NMR (100 MHz,  $\text{CDCl}_3$ )  $\delta$ : 172.6, 137.2, 137.2, 135.0, 131.4, 130.7, 129.0, 128.4, 124.9, 124.7, 120.6, 56.0, 54.8, 50.9, 25.4, 23.5, 21.6, 13.4; HRMS (ESI-TOF)  $m/z$ :  $\text{C}_{20}\text{H}_{25}\text{BrNO}_3\text{S}$  ( $\text{M} + \text{H}$ ) $^+$  calcd for 438.0733, found 438.0731.

**2-(2-bromophenyl)-2-methyl-3-(pentylsulfonyl)-N-phenylpropanamide (5al):**

Yield: 48.7 mg, 54%; yellow oil;  $^1\text{H}$  NMR (400 MHz,  $\text{CDCl}_3$ )  $\delta$ : 7.78 (d,  $J = 8.0$  Hz, 1H), 7.69 (d,  $J = 8.0$  Hz, 1H), 7.52 (t,  $J = 7.6$  Hz, 1H), 7.35-7.27 (m, 5H), 7.15-7.10 (m, 1H), 6.79 (s, 1H), 4.45 (d,  $J = 15.2$  Hz, 1H), 3.78 (d,  $J = 15.2$  Hz, 1H), 2.51-2.36 (m, 2H), 2.18 (s, 3H), 1.71-1.59 (m, 2H), 1.28-1.20 (m, 4H), 0.86 (t,  $J = 7.0$  Hz, 3H);  $^{13}\text{C}\{^1\text{H}\}$ NMR (100 MHz,  $\text{CDCl}_3$ )  $\delta$ : 172.6, 137.2 (2C), 135.0, 131.4, 130.7, 129.0, 128.4, 124.9, 124.7, 120.6, 56.0, 55.0, 51.0, 30.4, 25.4, 22.0, 21.3, 13.7; HRMS (ESI-TOF)  $m/z$ :  $\text{C}_{21}\text{H}_{27}\text{BrNO}_3\text{S}$  ( $\text{M} + \text{H}$ ) $^+$  calcd for 452.0890, found 452.0894.

**2-(2-bromophenyl)-3-(hexylsulfonyl)-2-methyl-N-phenylpropanamide (5am):**

Yield: 53.0 mg, 57%; yellow oil;  $^1\text{H}$  NMR (400 MHz,  $\text{CDCl}_3$ )  $\delta$ : 7.77 (d,  $J = 8.0$  Hz, 1H), 7.69 (d,  $J = 8.0$  Hz, 1H), 7.52 (t,  $J = 7.8$  Hz, 1H), 7.35-7.29 (m, 5H), 7.15-7.10 (m, 1H), 6.80 (s, 1H), 4.45 (d,  $J = 15.2$  Hz, 1H), 3.77 (d,  $J = 15.2$  Hz, 1H), 2.50-2.30 (m, 2H), 2.18 (s, 3H), 1.70-1.65 (m, 2H), 1.27-1.20 (m, 6H), 0.86 (t,  $J = 7.0$  Hz, 3H);  $^{13}\text{C}\{^1\text{H}\}$ NMR (100 MHz,  $\text{CDCl}_3$ )  $\delta$ : 172.6, 137.2, 137.2, 135.0, 131.4, 130.6, 129.0, 128.4, 124.9, 124.7, 120.6, 55.9, 55.0, 50.9, 31.0, 27.9, 25.4, 22.2, 21.5, 13.9; HRMS (ESI-TOF)  $m/z$ :  $\text{C}_{22}\text{H}_{29}\text{BrNO}_3\text{S}$  ( $\text{M} + \text{H}$ ) $^+$  calcd for 466.1047, found 466.1049.

**2-(2-bromophenyl)-2-methyl-3-(phenethylsulfonyl)-N-phenylpropanamide (5an):**

Yield: 46.6 mg, 48%; yellow oil;  $^1\text{H}$  NMR (400 MHz,  $\text{CDCl}_3$ )  $\delta$ : 7.80 (d,  $J = 8.0$  Hz, 1H), 7.67 (d,  $J = 8.0$  Hz, 1H), 7.53 (t,  $J = 7.2$  Hz, 1H), 7.33-7.26 (m, 6H), 7.24-7.20 (m, 2H), 7.15-7.11 (m, 1H), 7.06 (d,  $J = 7.2$  Hz, 2H), 6.79 (s, 1H), 4.50 (d,  $J = 15.2$  Hz, 1H), 3.83 (d,  $J = 15.2$  Hz, 1H), 3.02-2.97 (m, 2H), 2.81-2.72 (m, 1H), 2.69-2.61 (m, 1H), 2.20 (s, 3H);  $^{13}\text{C}\{^1\text{H}\}$ NMR (100 MHz,  $\text{CDCl}_3$ )  $\delta$ : 172.5, 137.4, 137.1, 137.1, 135.0, 131.4, 130.7, 129.0, 128.8, 128.5, 128.3, 126.9, 125.0, 124.7, 120.6, 56.4, 51.0, 29.7, 27.6, 25.4; HRMS (ESI-TOF)  $m/z$ :  $\text{C}_{24}\text{H}_{25}\text{BrNO}_3\text{S}$  ( $\text{M} + \text{H}$ ) $^+$  calcd for 486.0734, found 486.0731.

**3-((isopropylsulfonyl)methyl)-3-methyl-1-phenylindolin-2-one (6):**

Yield: 28.1 mg, 82%; yellow oil;  $^1\text{H}$  NMR (400 MHz,  $\text{CDCl}_3$ )  $\delta$ : 7.55-7.50 (m, 2H), 7.49-7.45 (m, 2H), 7.45-7.38 (m, 2H), 7.26-7.22 (m, 1H), 7.16-7.11 (m, 1H), 6.81 (d,  $J = 7.6$  Hz, 1H), 3.77

(d,  $J = 14.0$  Hz, 1H), 3.57 (d,  $J = 14.4$  Hz, 1H), 2.96-2.85 (m, 1H), 1.57 (s, 3H), 1.33-1.30 (m, 6H);  $^{13}\text{C}\{^1\text{H}\}$ NMR (100 MHz,  $\text{CDCl}_3$ )  $\delta$ : 177.7, 143.5, 134.5, 130.0, 129.6, 128.7, 128.2, 126.8, 123.8, 122.8, 109.8, 55.3, 54.9, 45.3, 25.7, 15.2, 15.0; HRMS (ESI-TOF)  $m/z$ :  $\text{C}_{19}\text{H}_{22}\text{NO}_3\text{S}$  ( $\text{M} + \text{H}$ ) $^+$  calcd for 344.1315, found 344.1318.

#### 4. References

- [1] W.-Q. Kong, E. Merino, C. Nevado, Arylphosphonylation and Arylazidation of Activated Alkenes. *Angew. Chem., Int. Ed.* **2014**, *53*, 5078-5082.
- [2] (a) Á. Gutiérrez-Bonet, J.-C. Tellis, J.-K. Matsui, B.-A. Vara, G.-A. Molander, 1,4-Dihydropyridines as Alkyl Radical Precursors: Introducing the Aldehyde Feedstock to Nickel/Photoredox Dual Catalysis. *ACS Catal.*, **2016**, *6*, 8004-8008. (b) W. Chen, Z. Liu, J. Tian, J. Lia, J. Ma, X. Cheng, G. Li, Building Congested Ketones: Substituted Hantzsch Ester and Nitrile as Alkylation Reagents in Photoredox Catalysis. *J. Am. Chem. Soc.*, **2016**, *138*, 12312-12315.

## 5. Spectra

### 1-Butyl-3-((isopropylsulfonyl)methyl)-3-methylindolin-2-one (3aa)

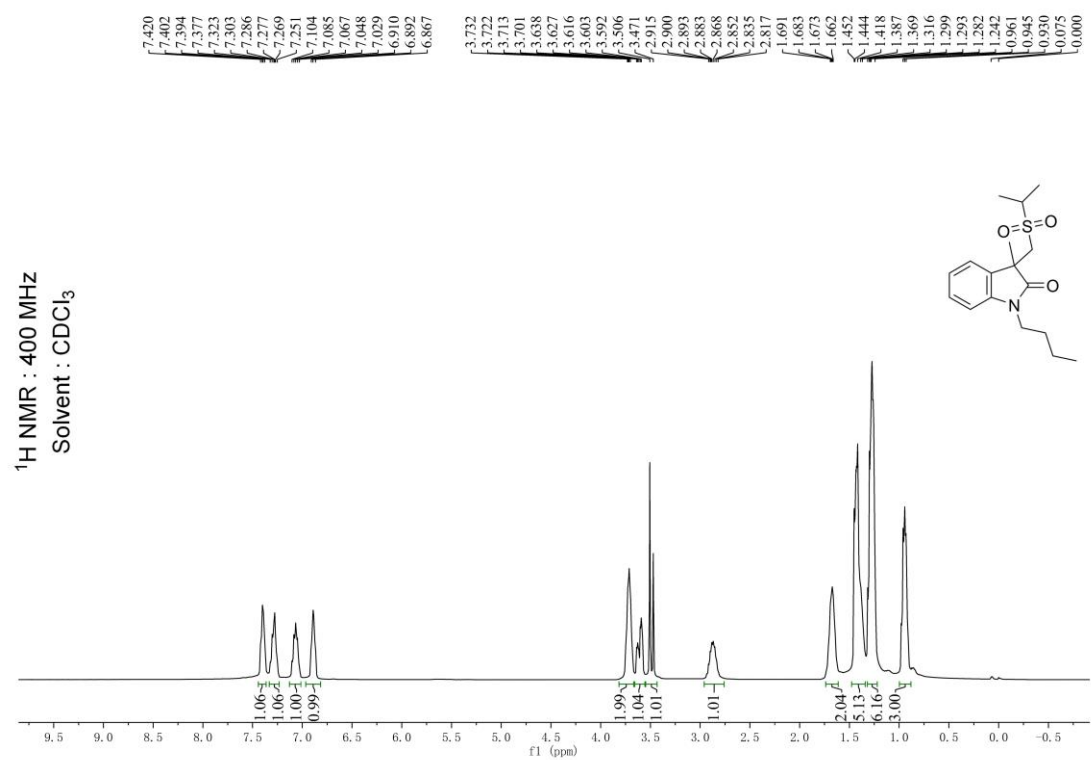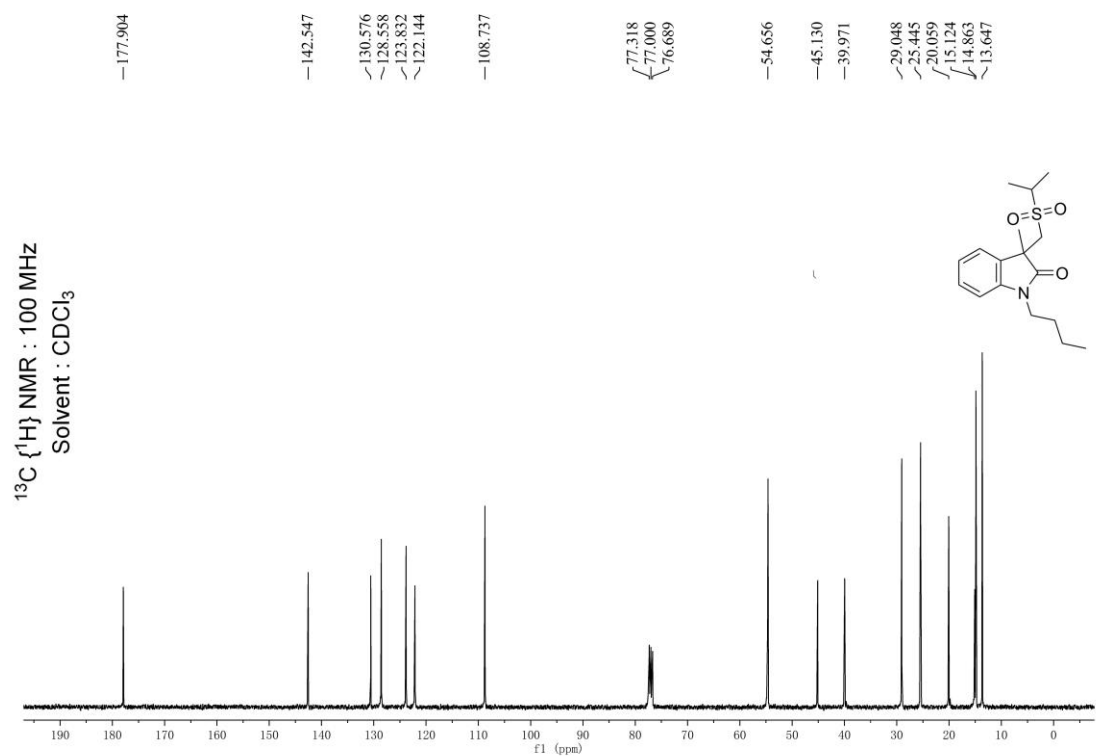

### 3-((isopropylsulfonyl)methyl)-3-methyl-1-propylindolin-2-one (3ba)

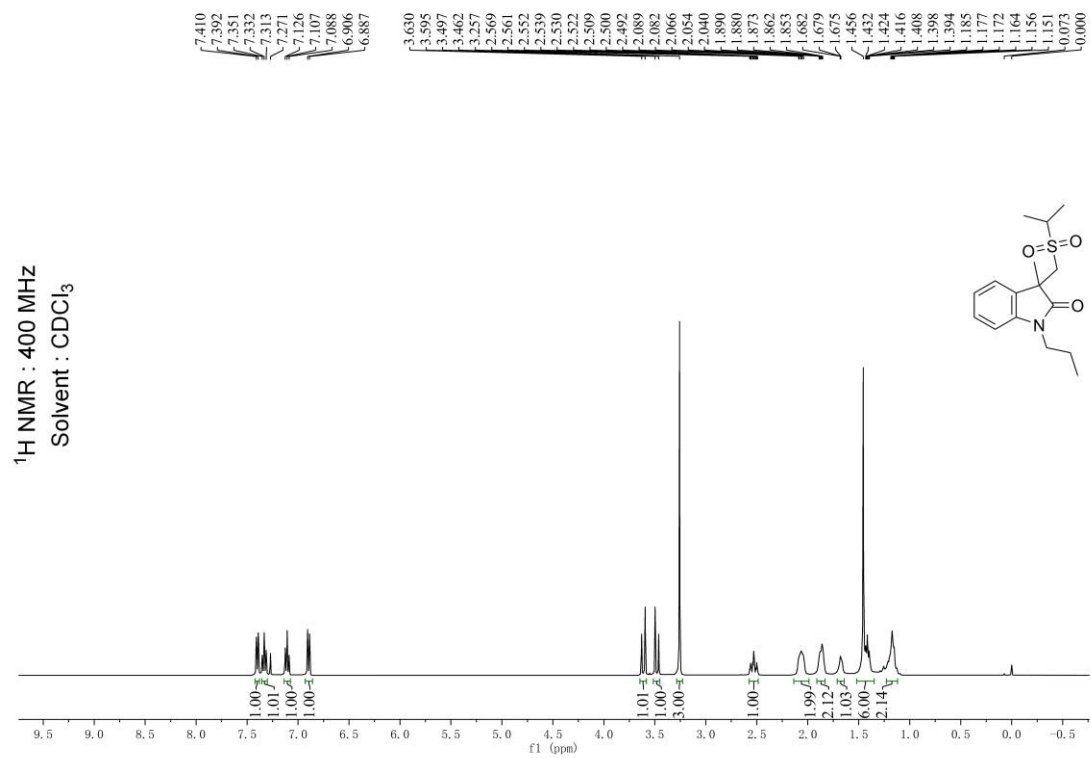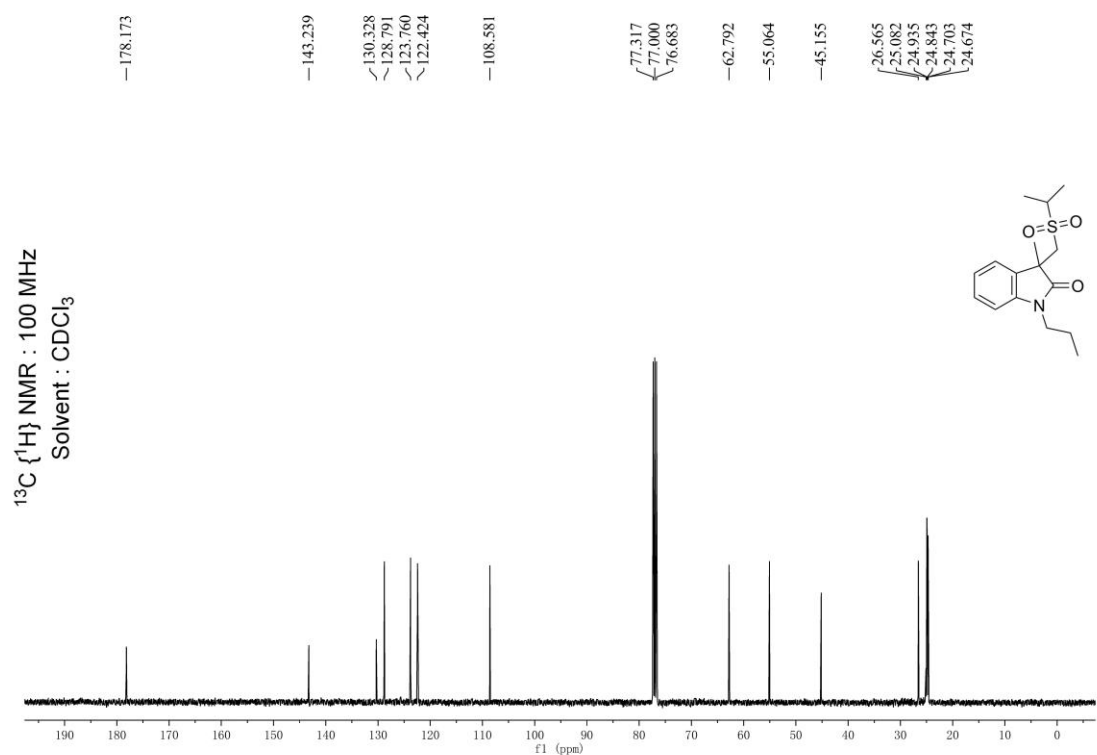



# 1-Cyclohexyl-3-((isopropylsulfonyl)methyl)-3-methylindolin-2-one

(3ca)

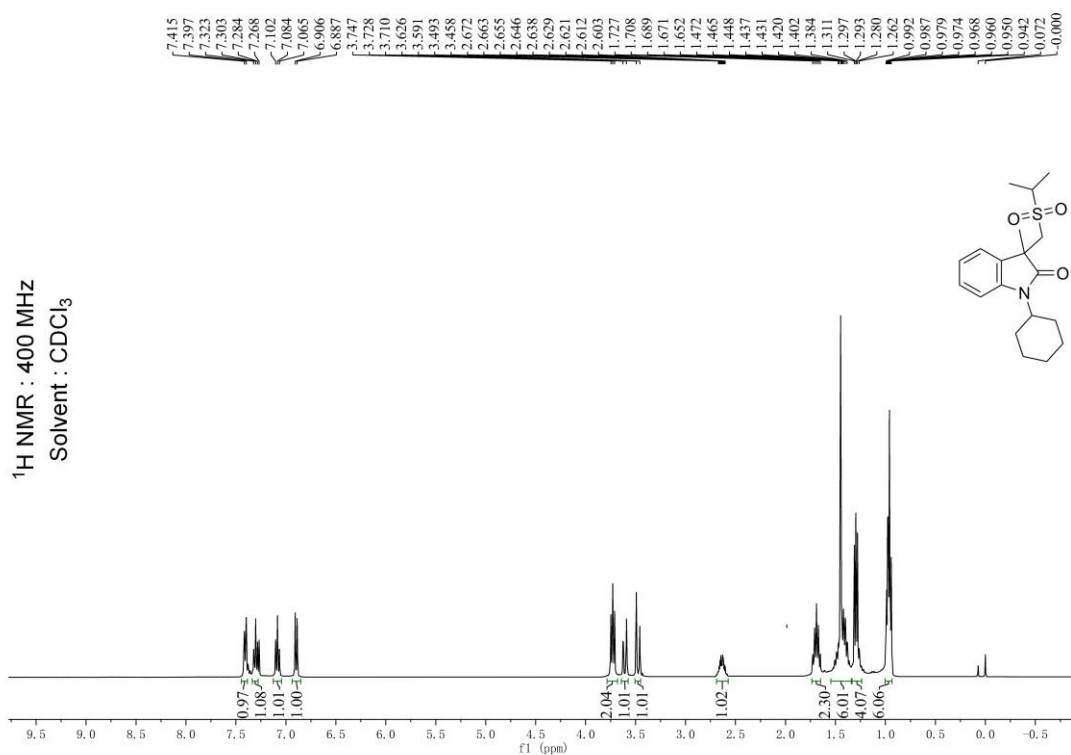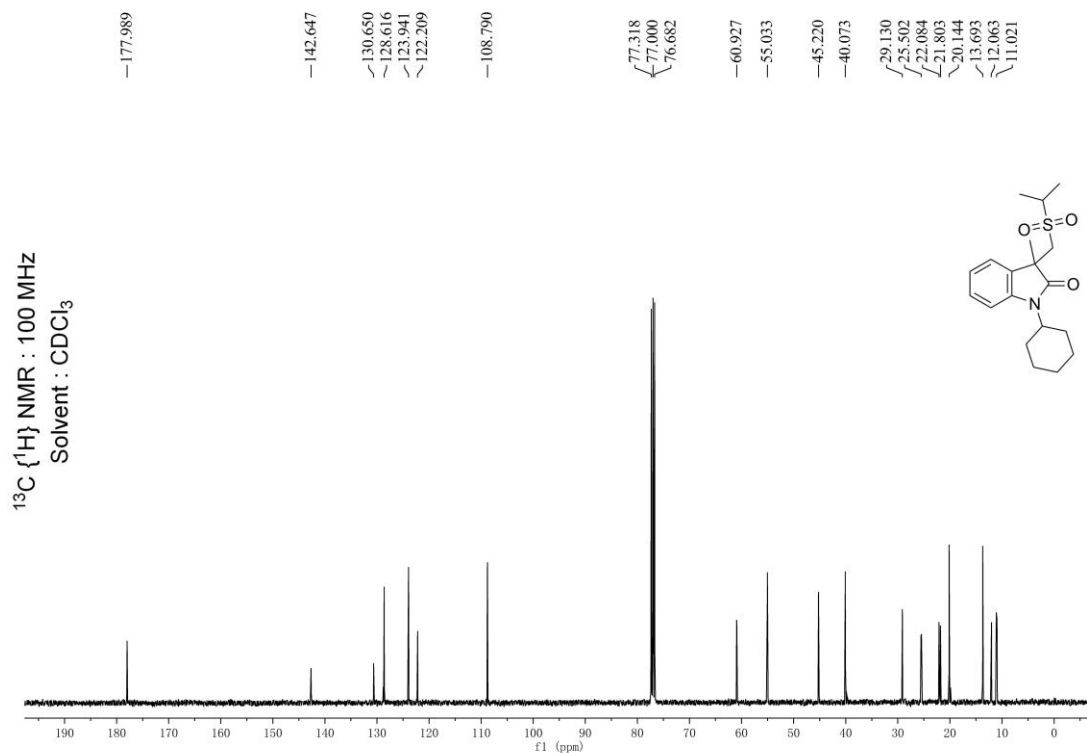

# 1-Butyl-3-((isopropylsulfonyl)methyl)-3,6-dimethylindolin-2-one

## (3da)

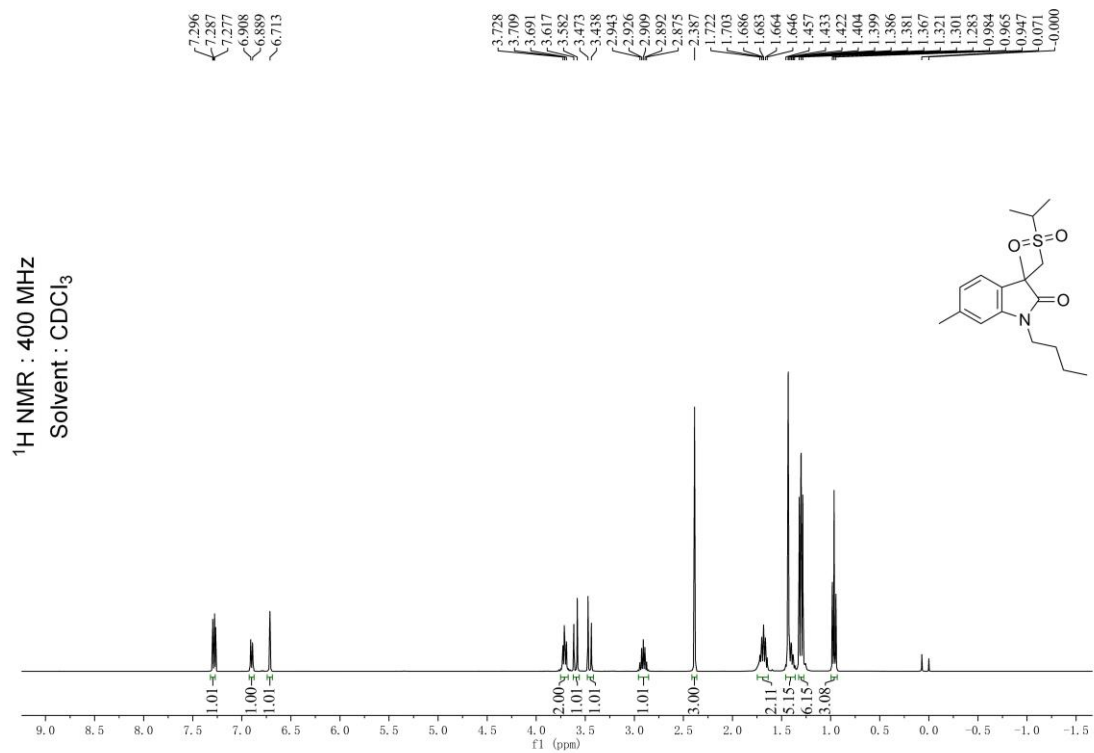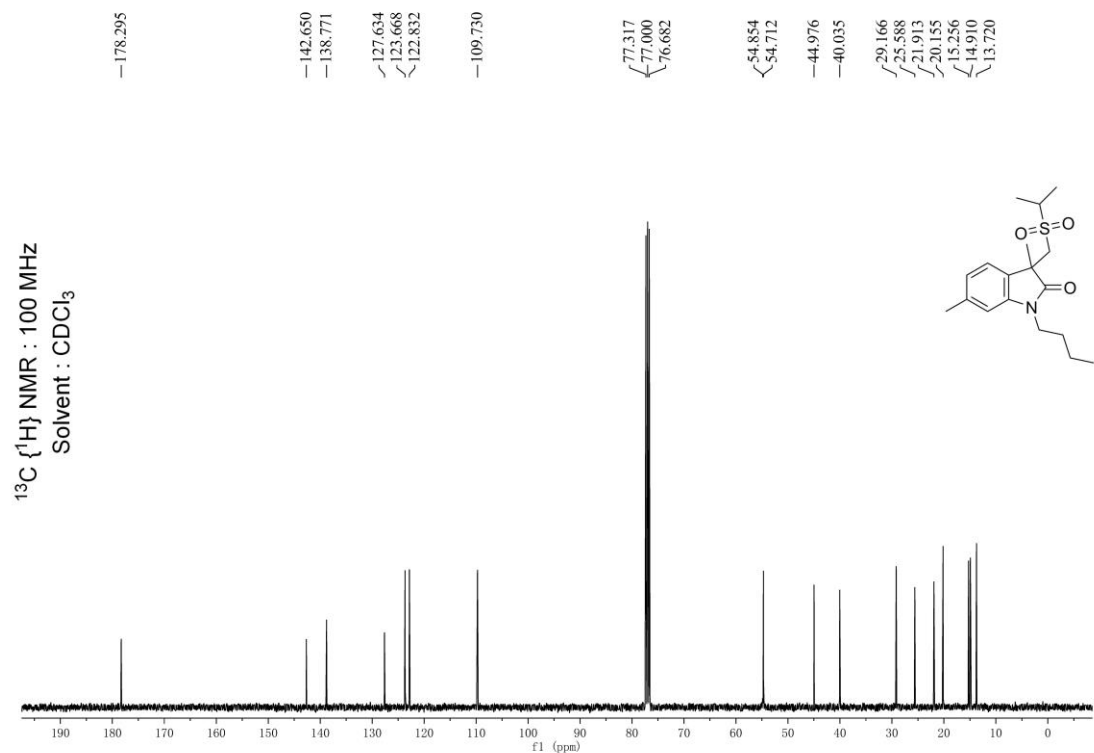

# 6-(tert-butyl)-1-butyl-3-((isopropylsulfonyl)methyl)-3-methylindolin-2-one (3ea)

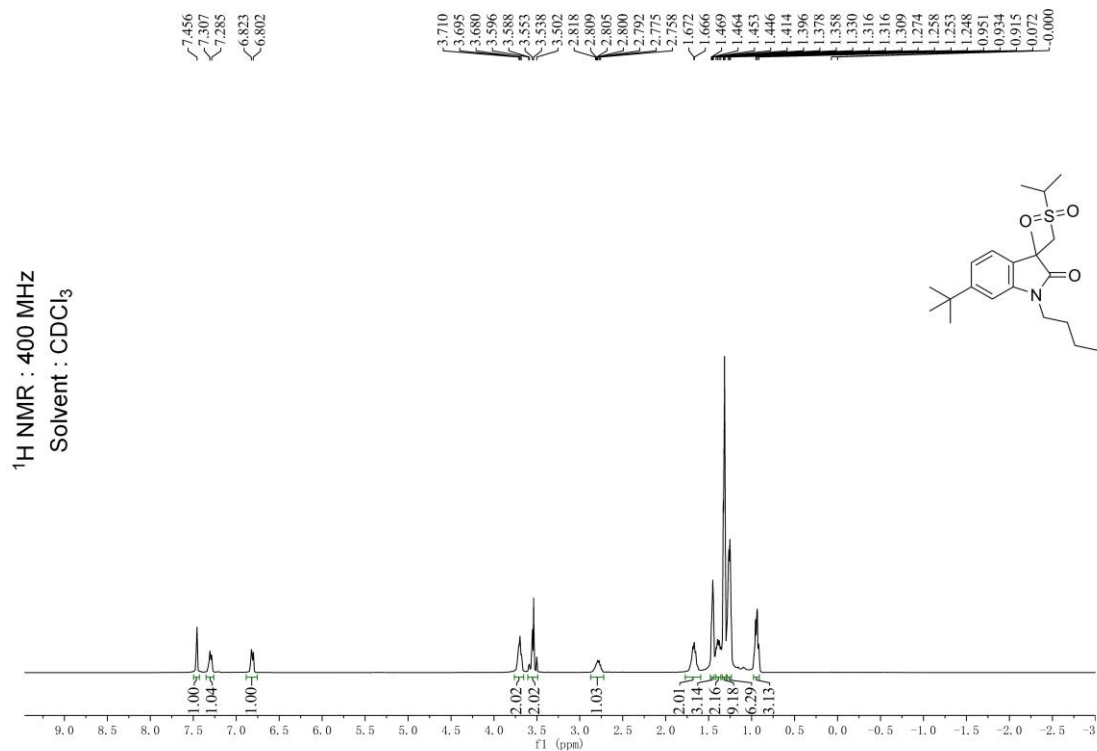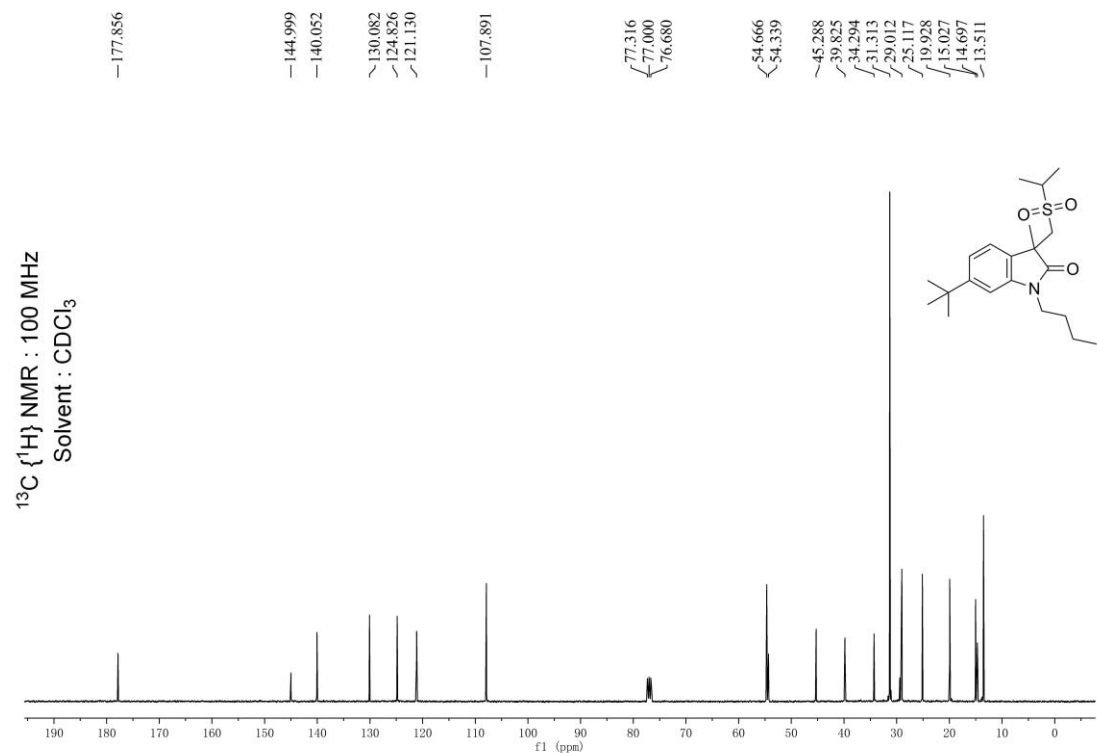

# 6-Bromo-1-butyl-3-((isopropylsulfonyl)methyl)-3-methylindolin-2-one (3fa)

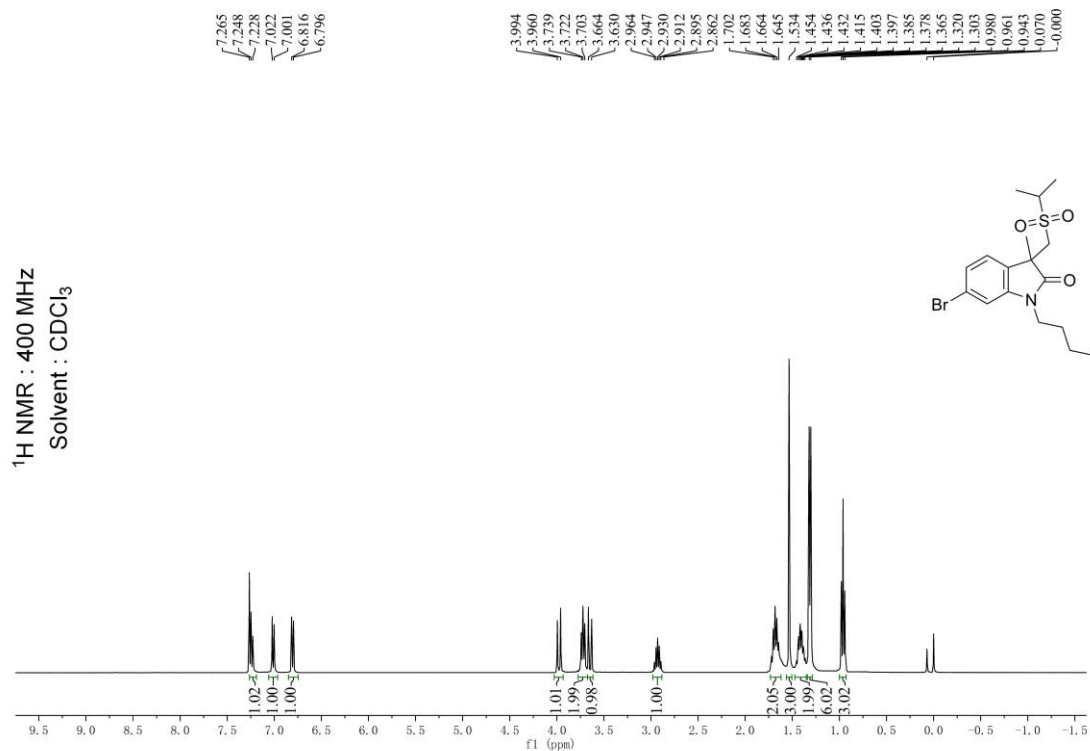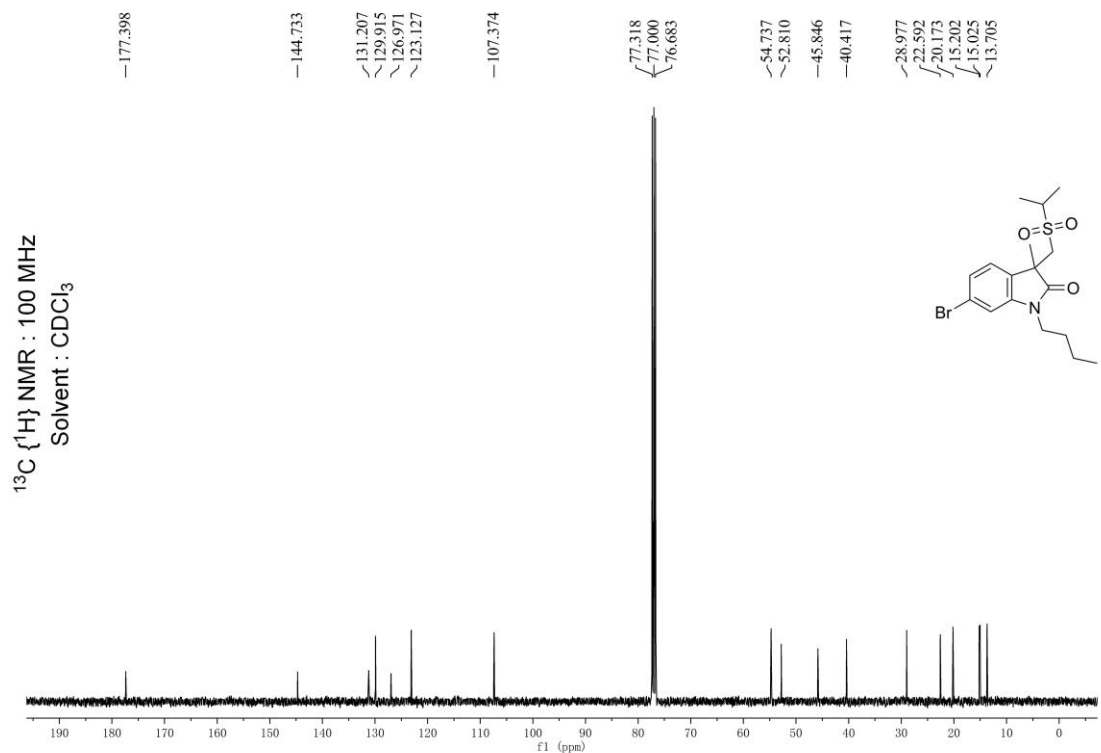

**1-Butyl-3-((isopropylsulfonyl)methyl)-3-methyl-6-(trifluoromethyl)indolin-2-one (3ga)**

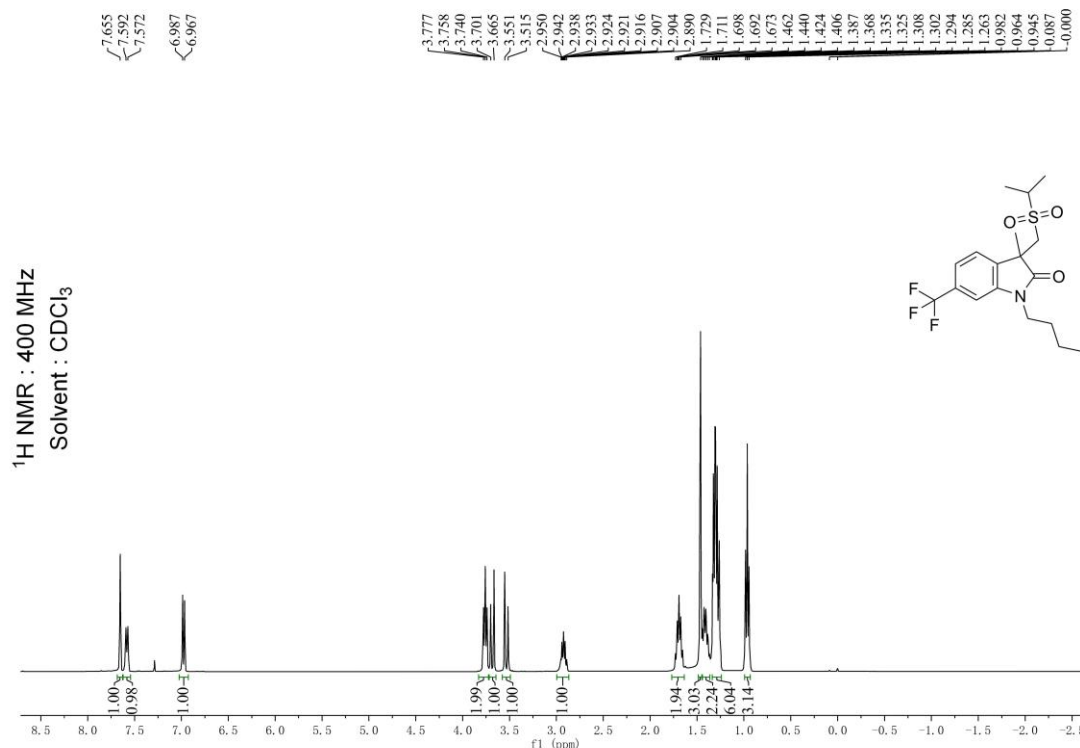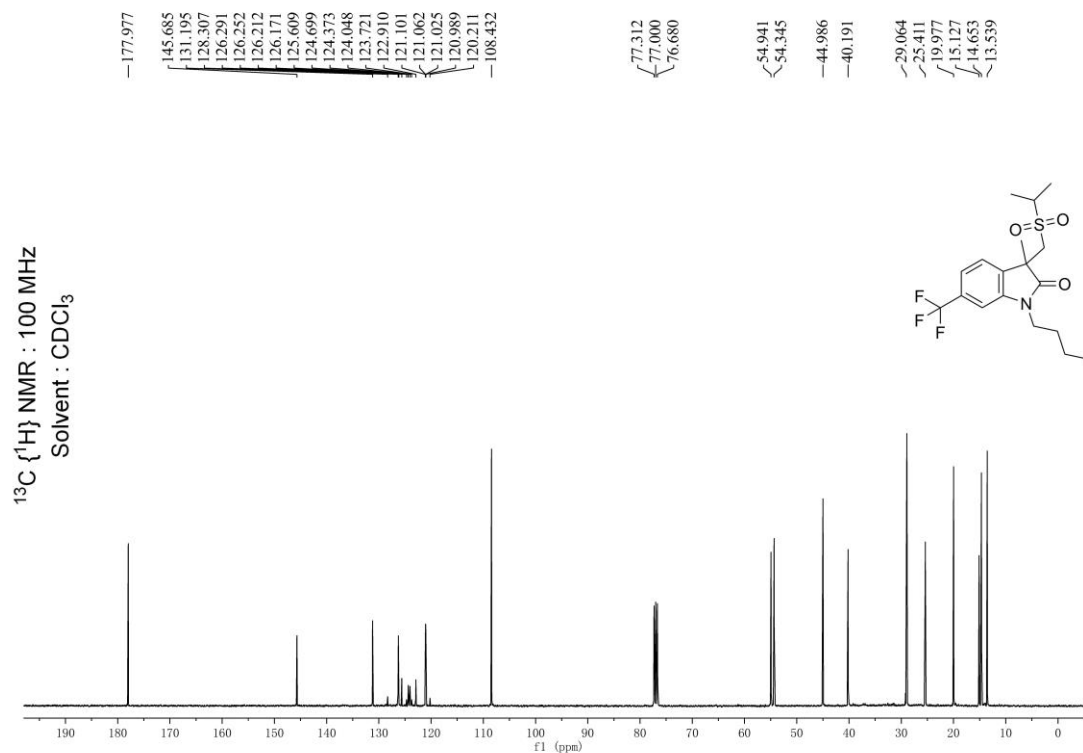

<sup>19</sup>F NMR : 282 MHz  
Solvent : CDCl<sub>3</sub>

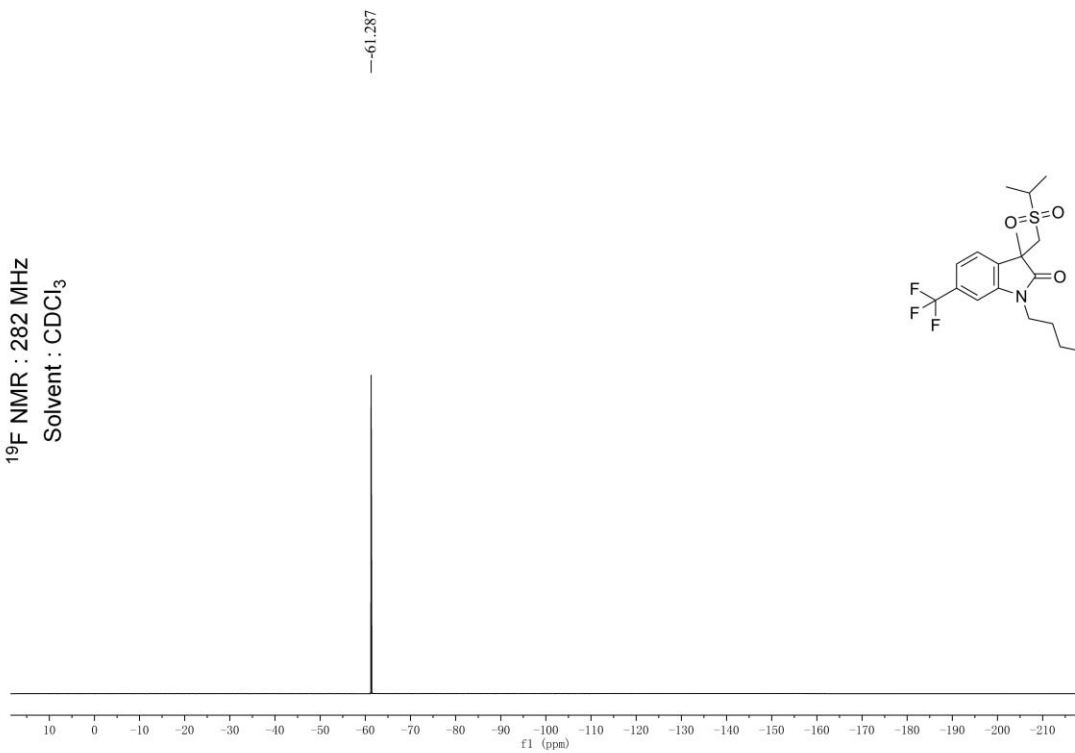

# 1-Butyl-3-((isopropylsulfonyl)methyl)-3-methyl-2-oxoindoline-6-carbonitrile (3ha)

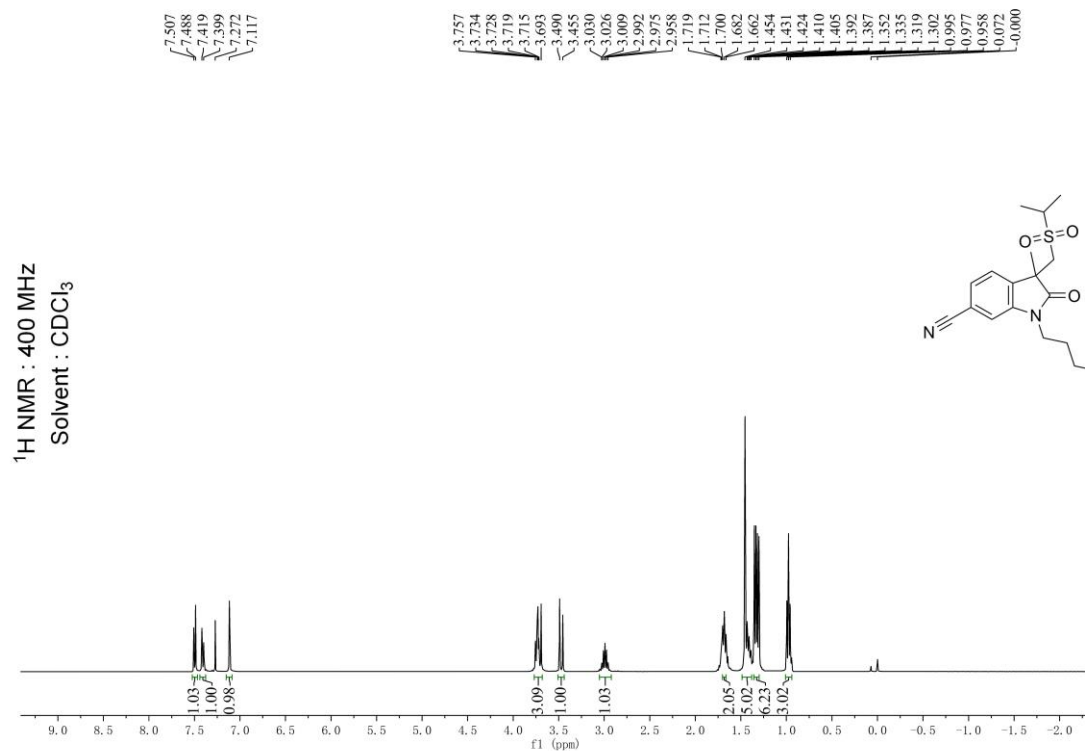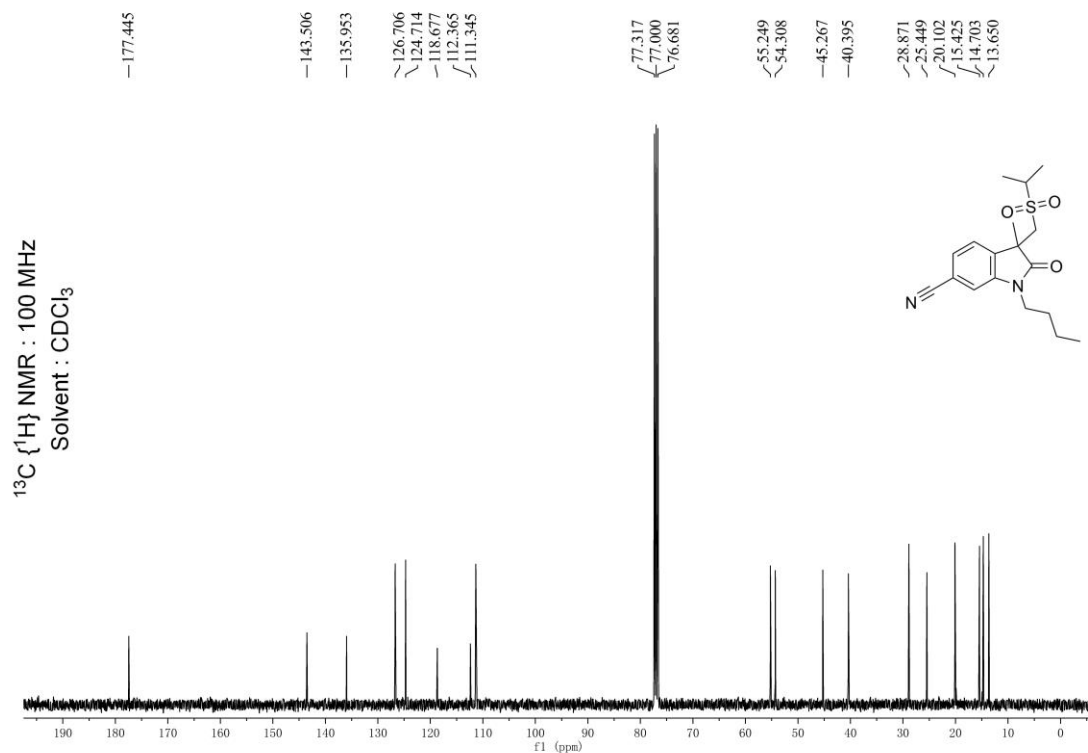

# 1-Butyl-3-((isopropylsulfonyl)methyl)-3,4-dimethylindolin-2-one (3ia)

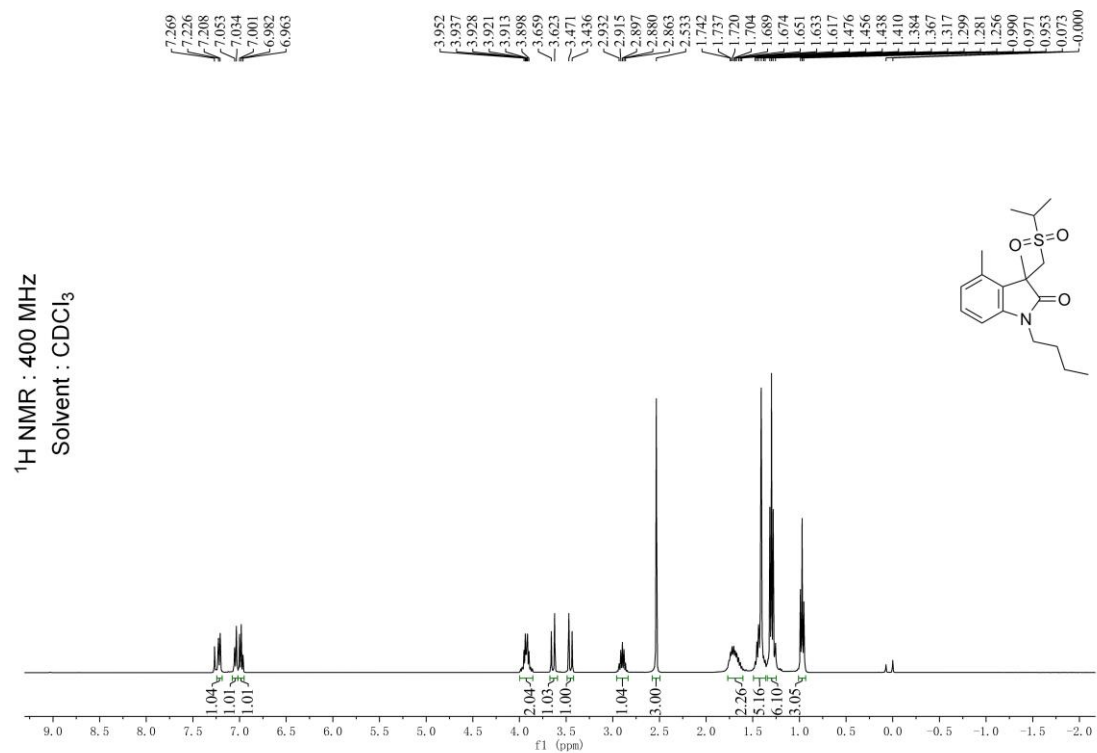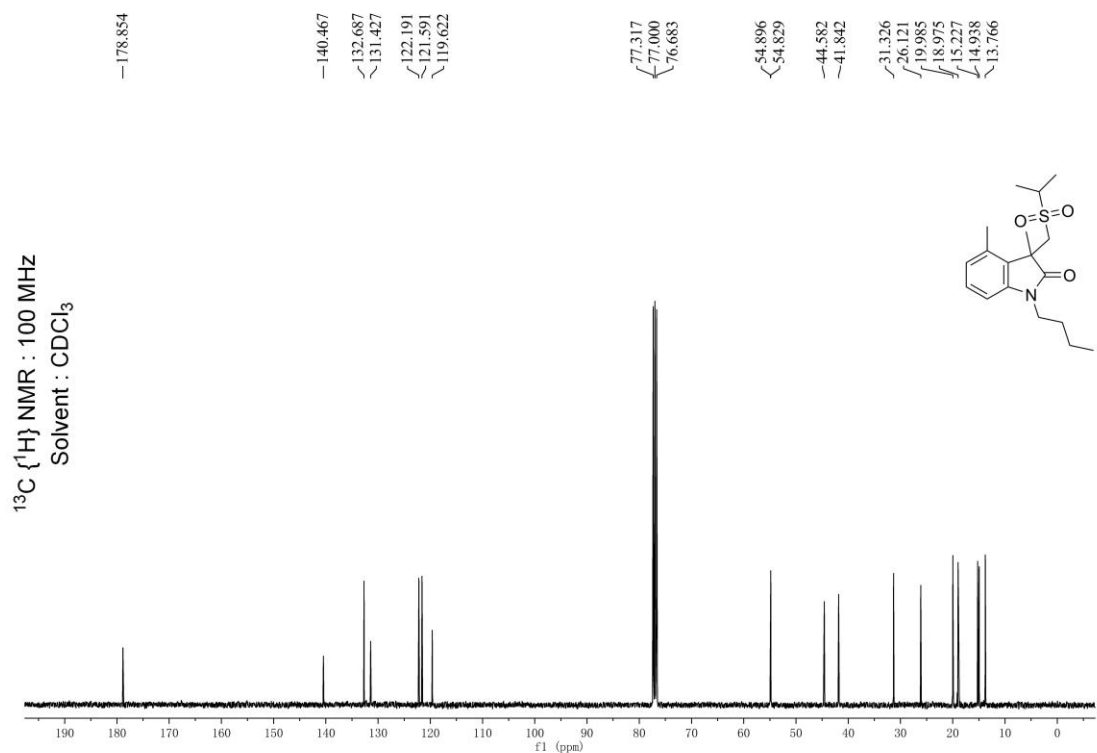



# 1-Butyl-4-chloro-3-((isopropylsulfonyl)methyl)-3-methylindolin-2-one

(3ja)

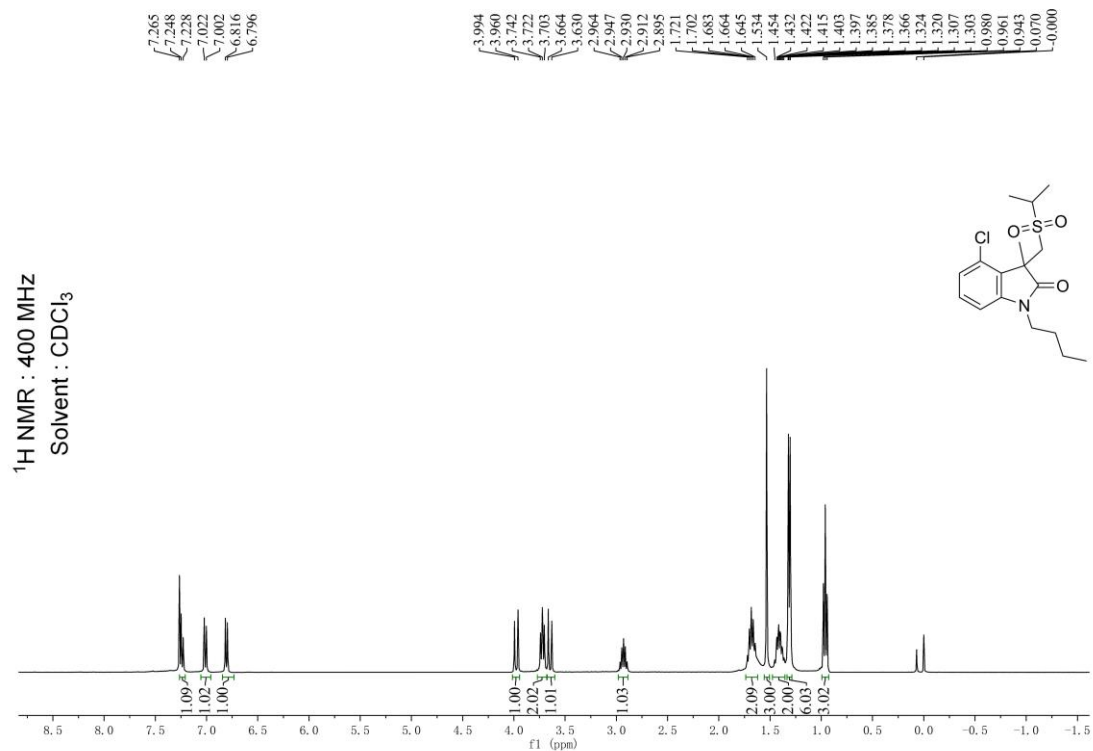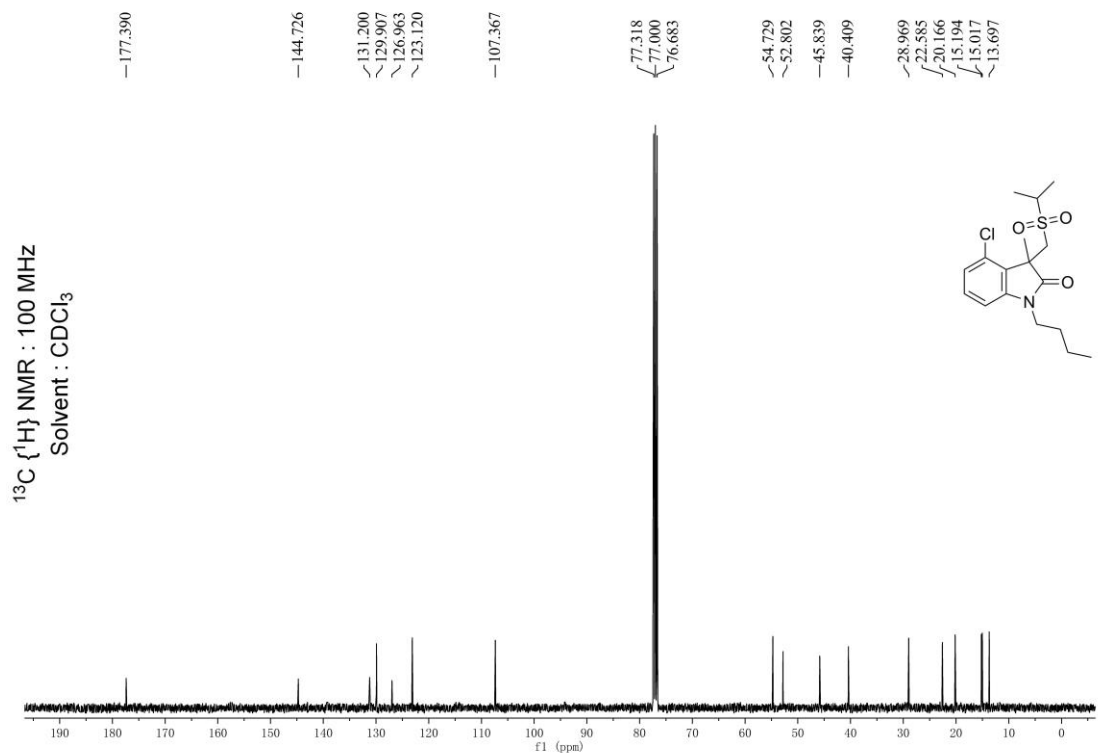

# 1-Butyl-3-methyl-3-(((pentan-2-yl)sulfonyl)methyl)indolin-2-one

(3ab)

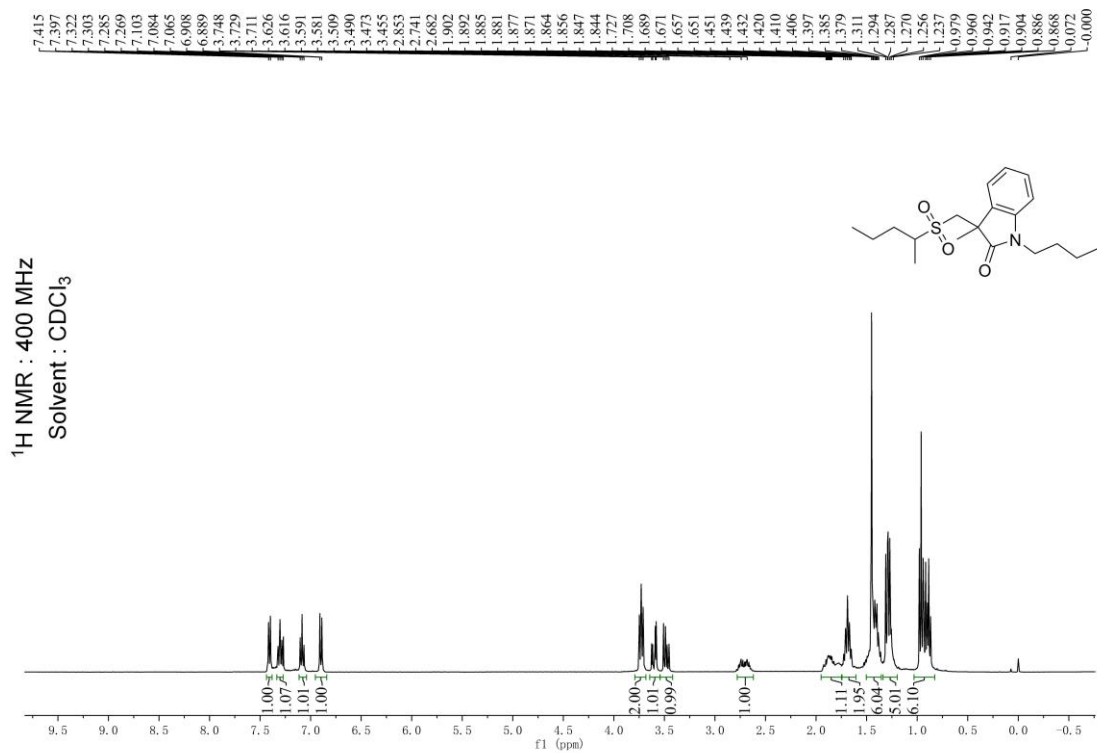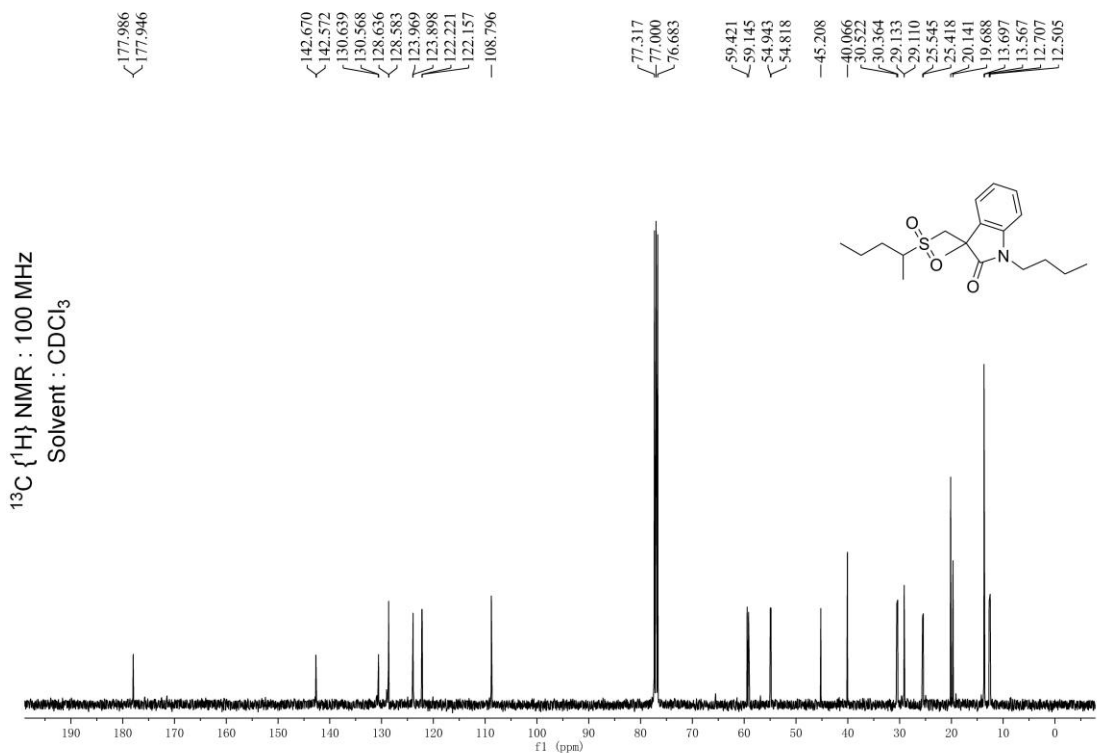

# 3-(((1-(benzo[d][1,3]dioxol-5-yl)propan-2-yl)sulfonyl)methyl)-1-butyl-3-methylindolin-2-one (3ac)

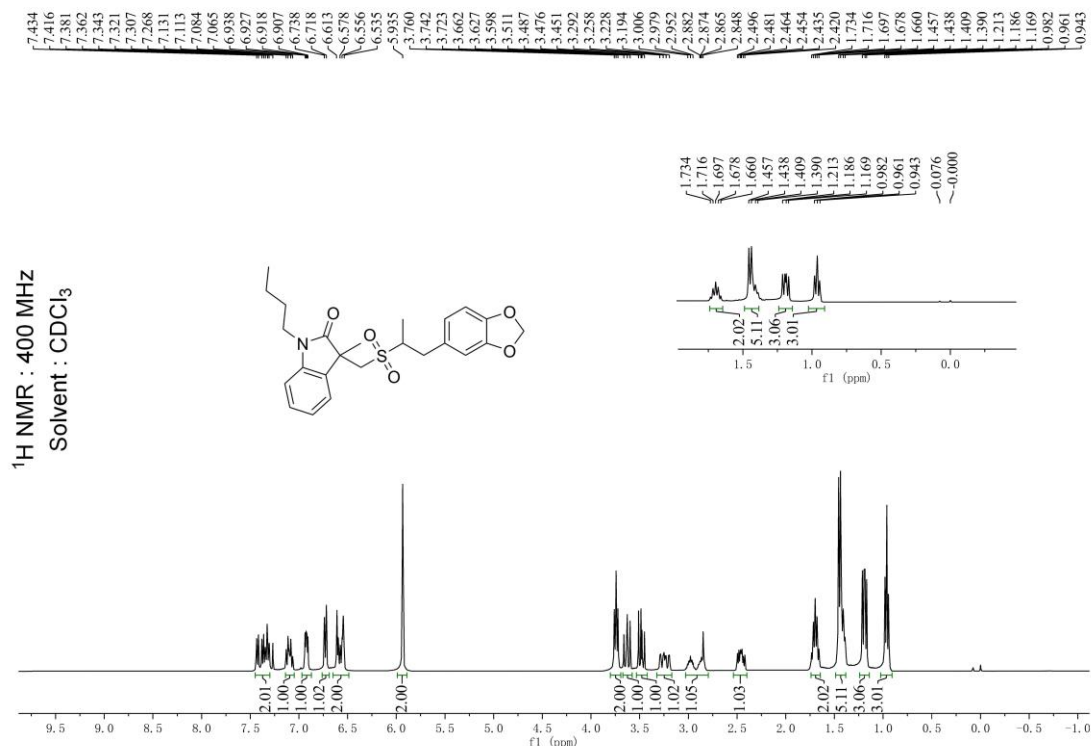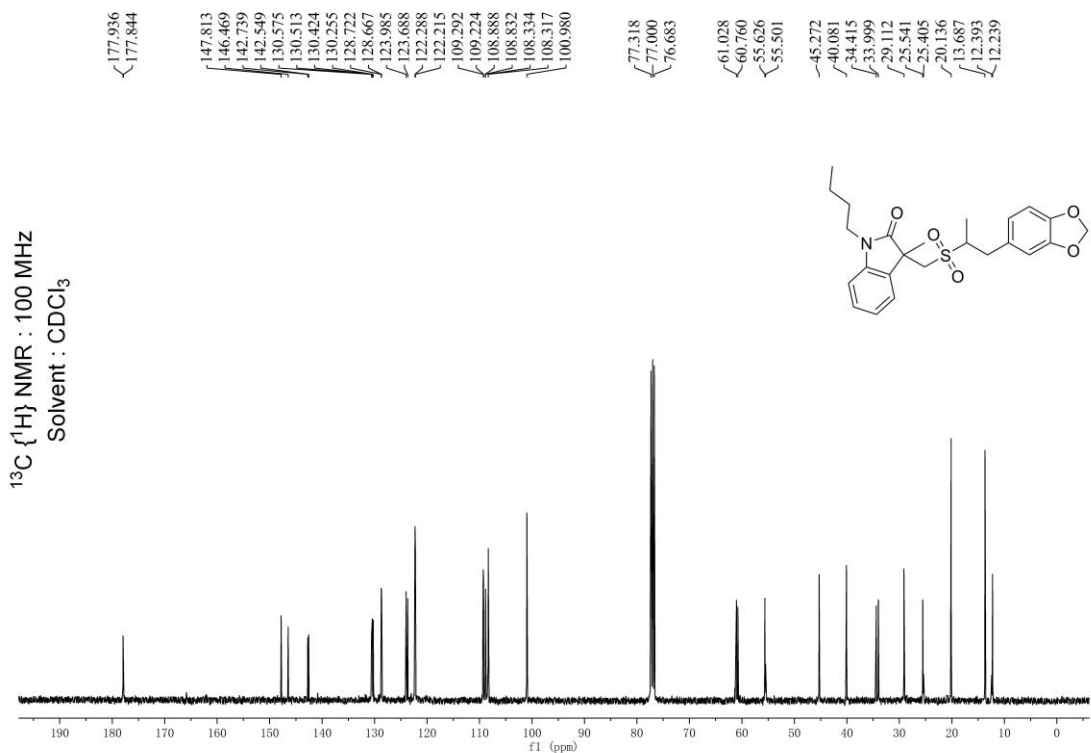

# 1-Butyl-3-((cyclohexylsulfonyl)methyl)-3-methylindolin-2-one (3ad)

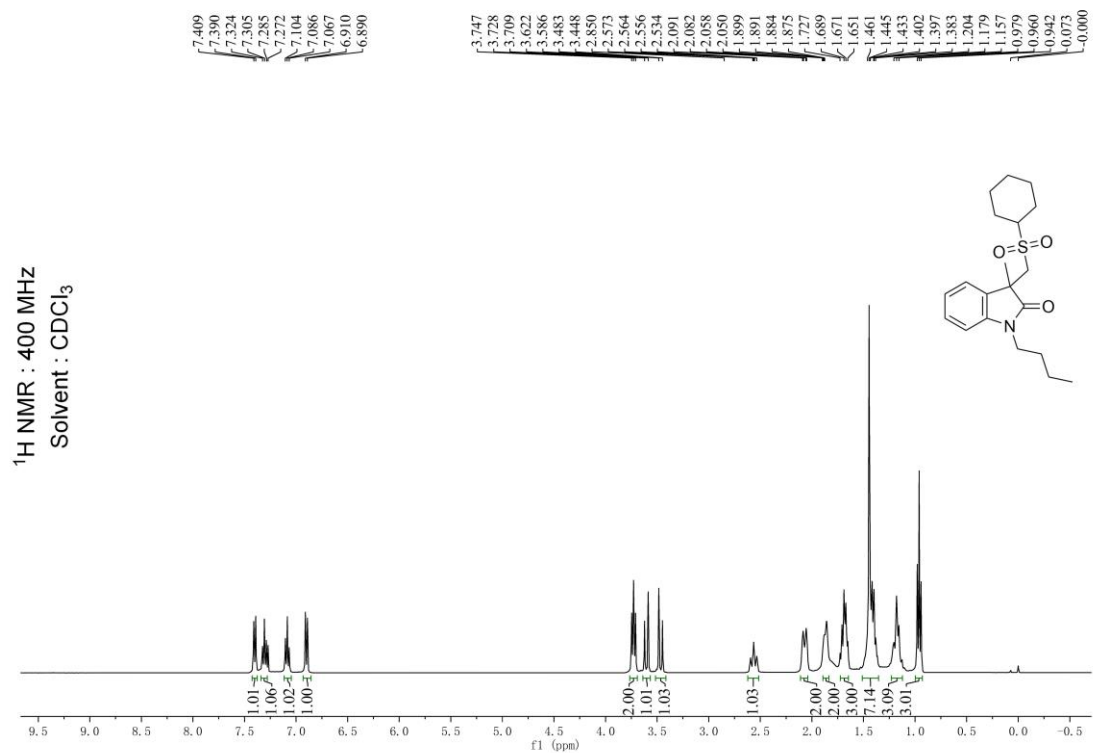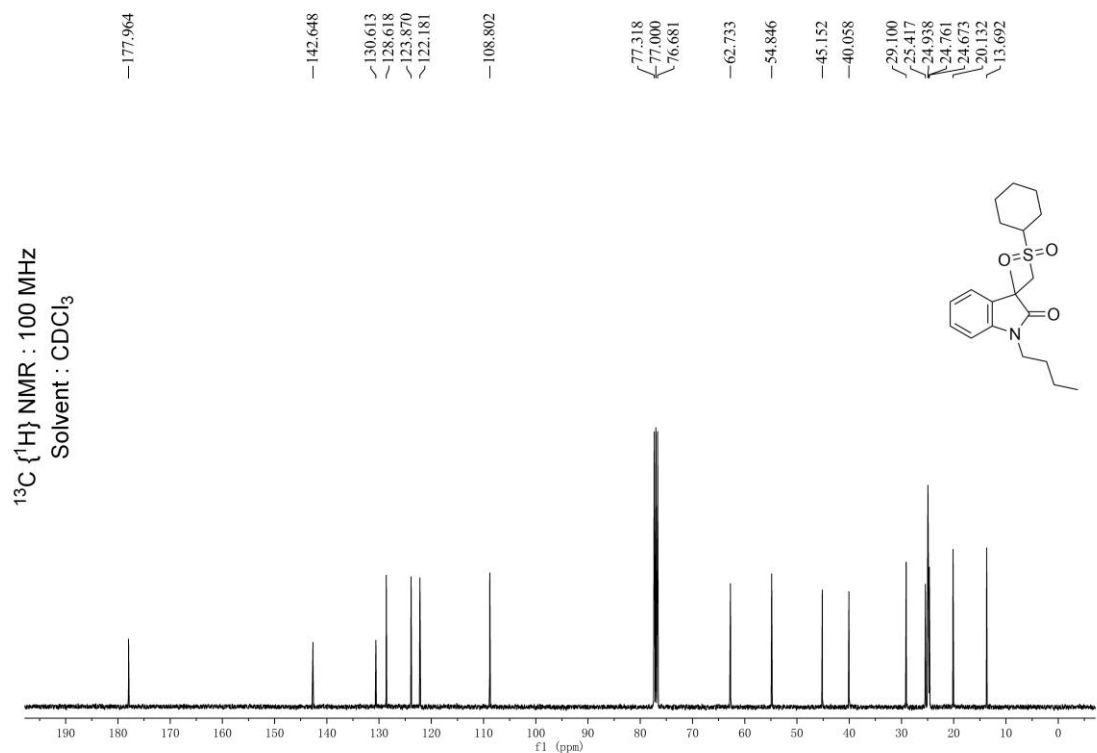

# 1-Butyl-3-(((cyclohex-3-en-1-yl)sulfonyl)methyl)-3-methylindolin-2-one (3ae)

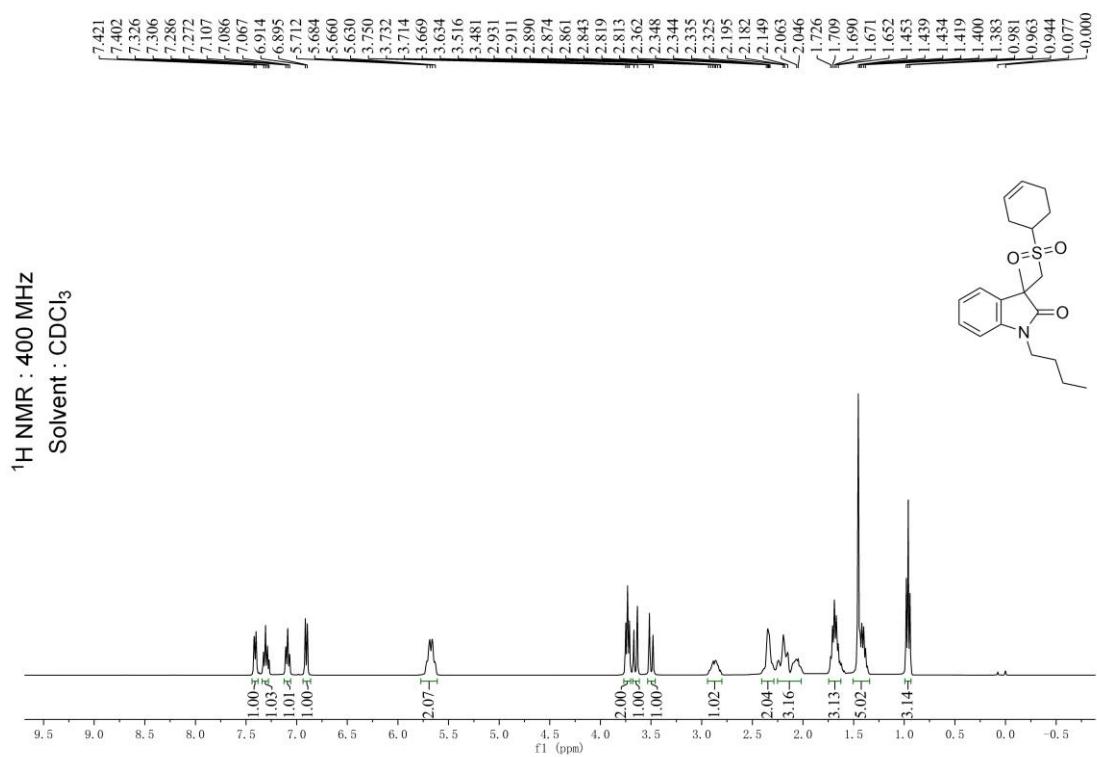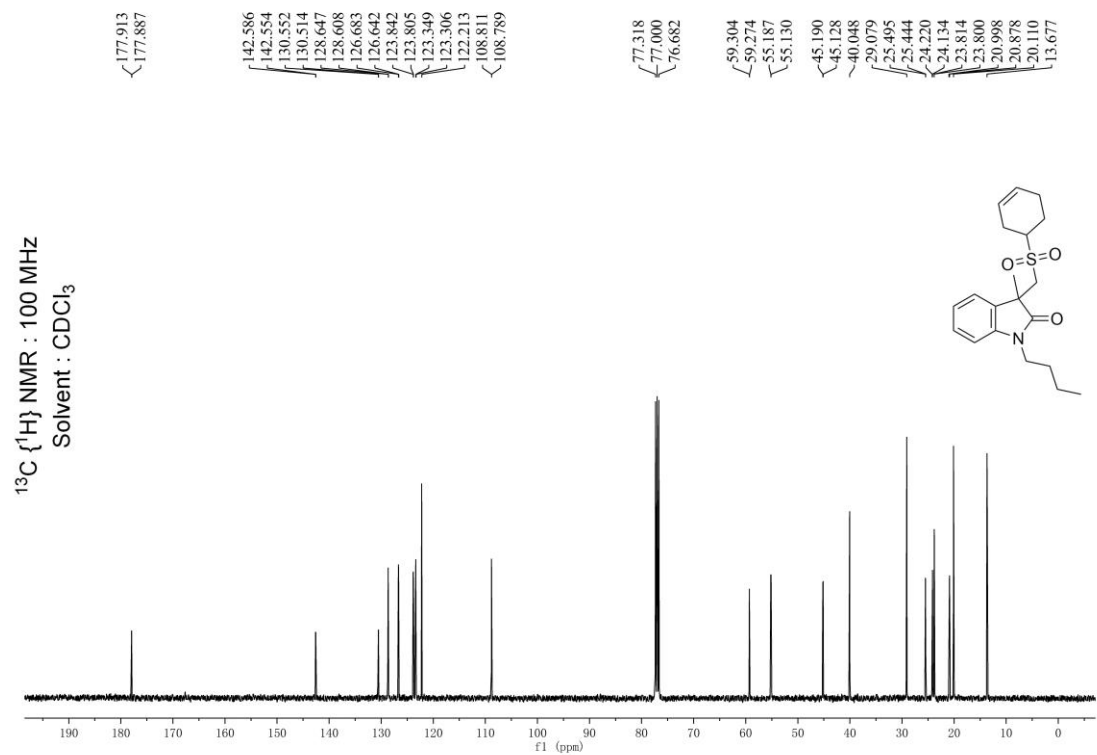

# 1-Butyl-3-((butylsulfonyl)methyl)-3-methylindolin-2-one (3af)

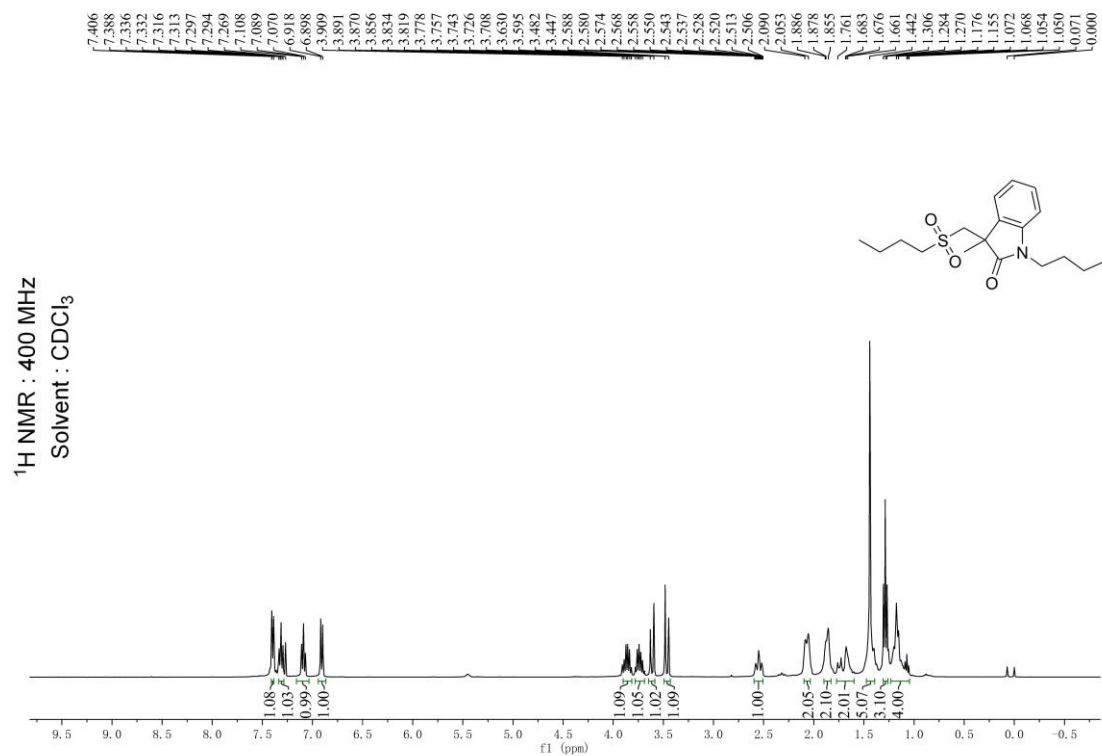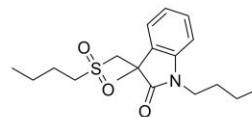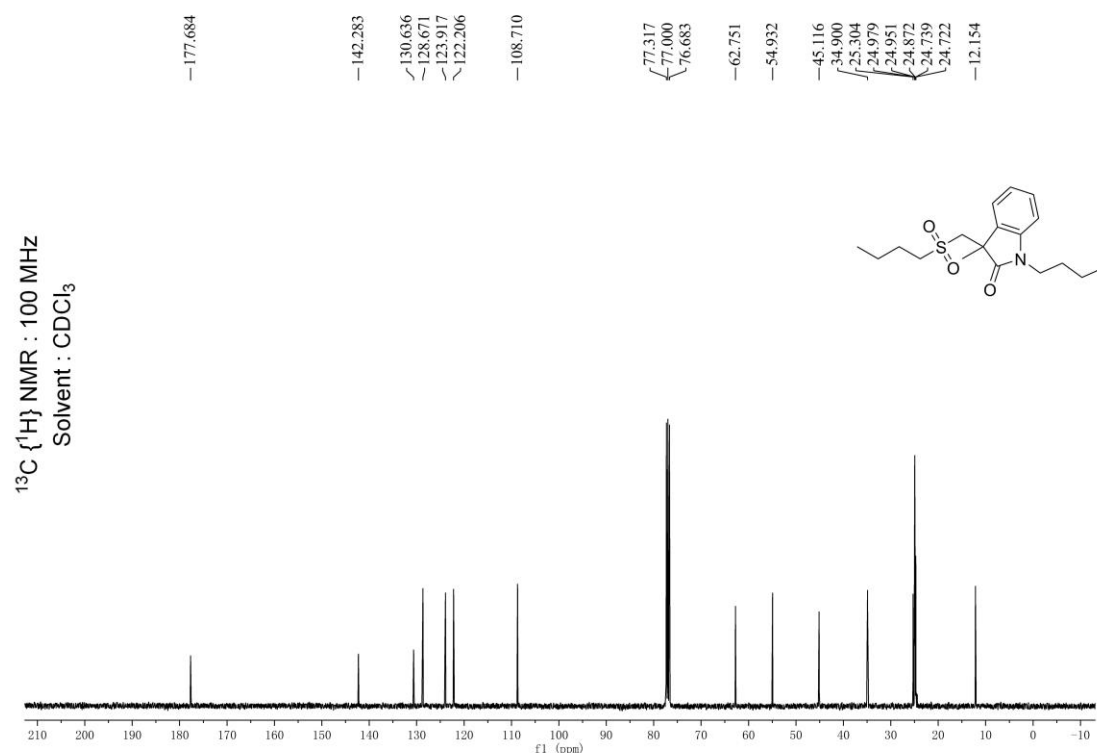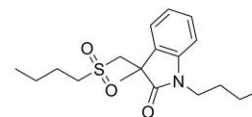

# 1-Butyl-3-methyl-3-((pentylsulfonyl)methyl)indolin-2-one (3ag)

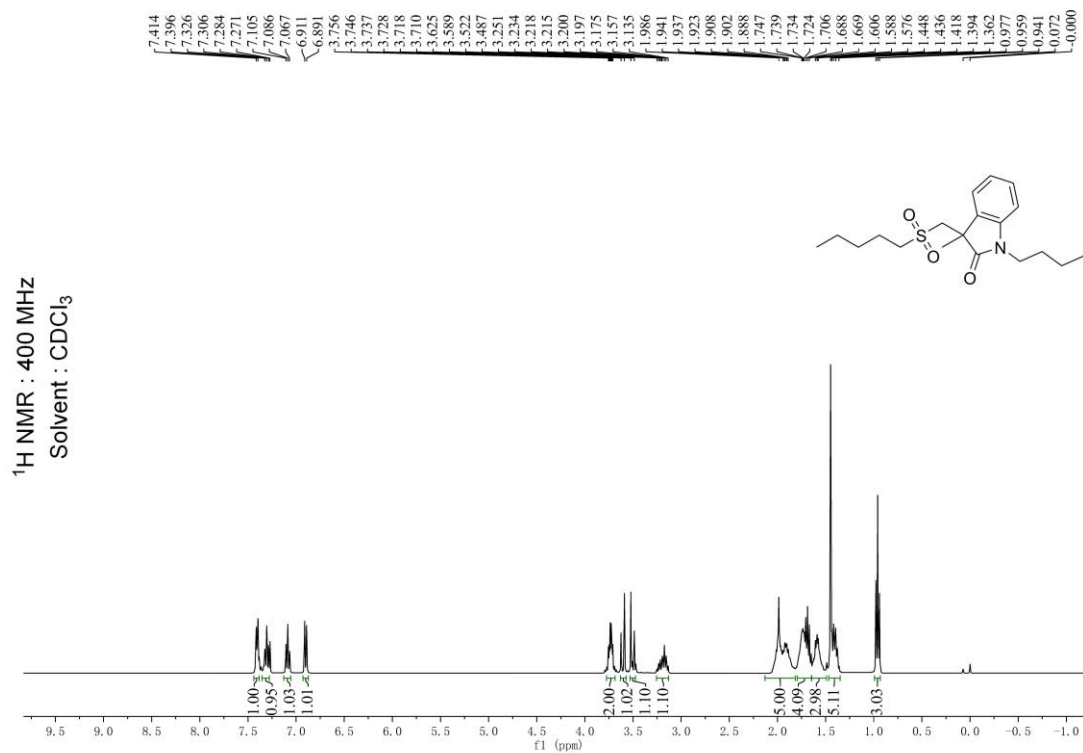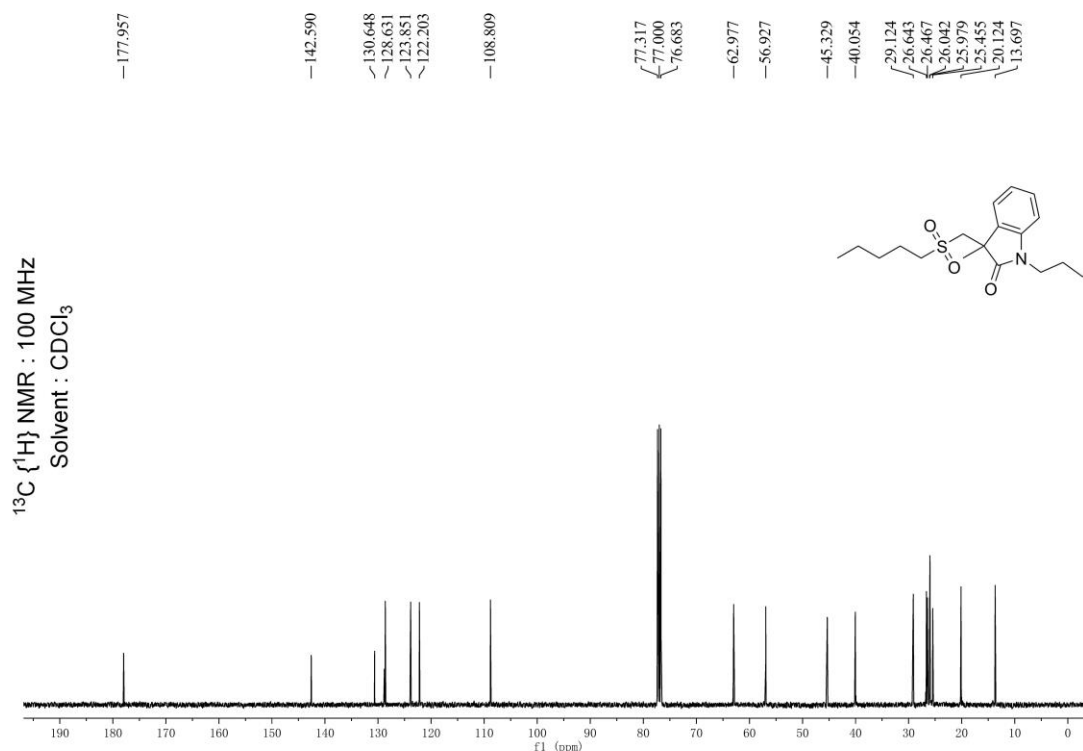

# 1-Butyl-3-methyl-3-((phenethylsulfonyl)methyl)indolin-2-one (3ah)

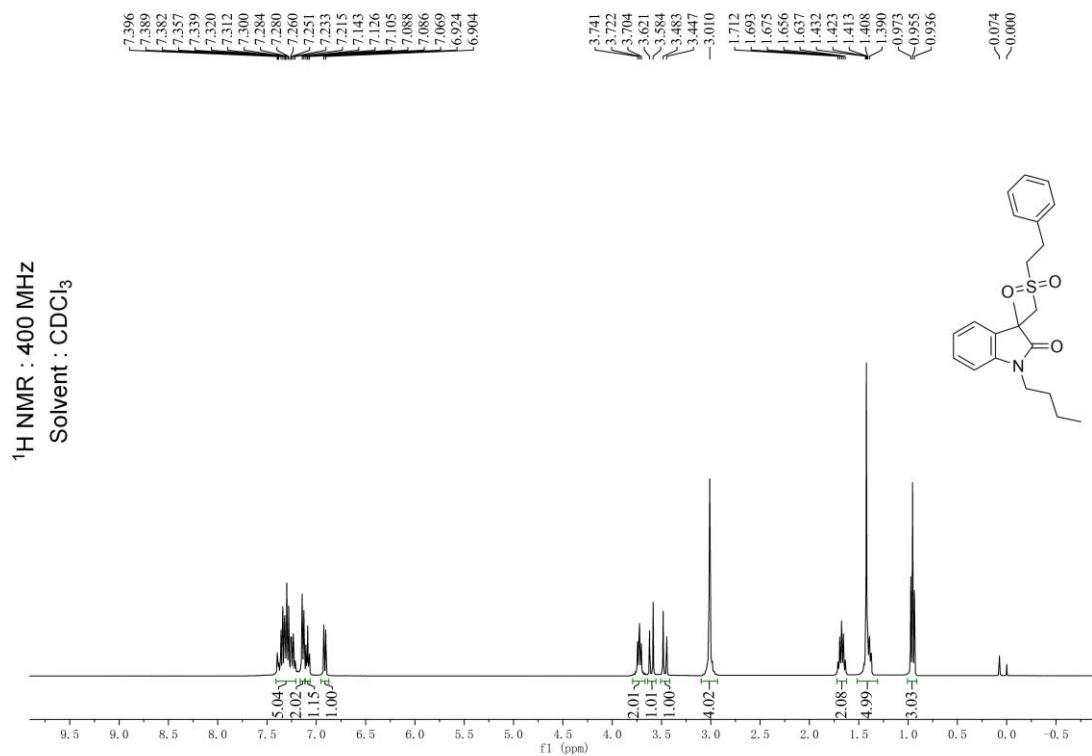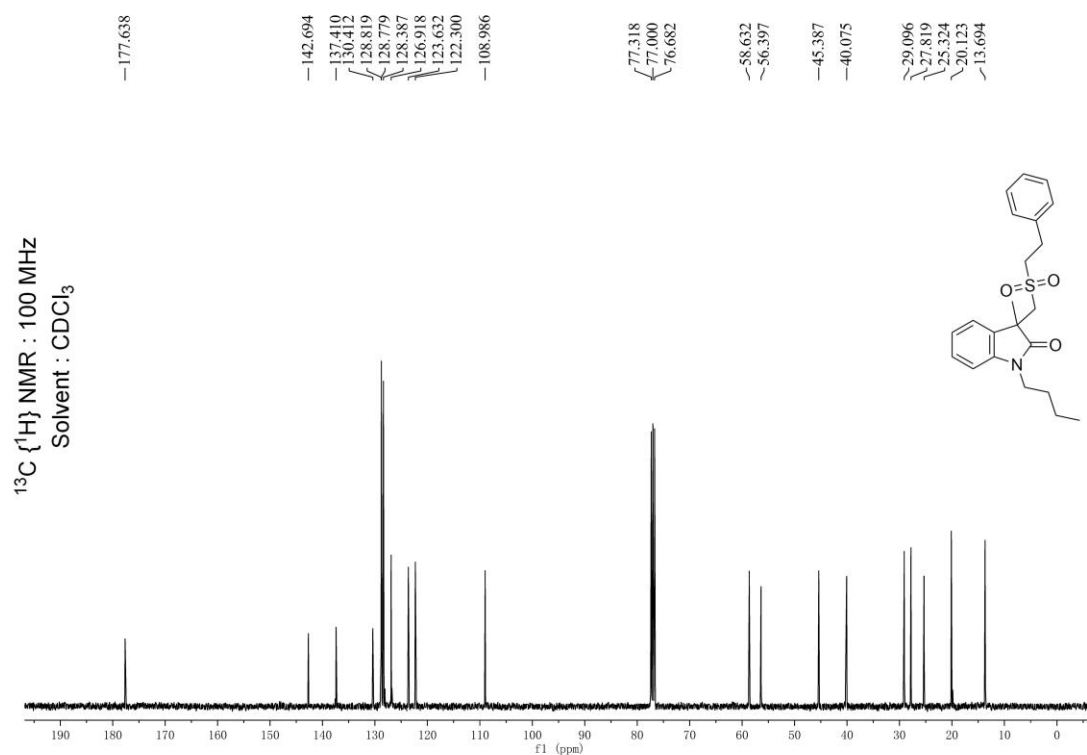



**2-(2-bromophenyl)-3-(isopropylsulfonyl)-2-methyl-N-phenylpropanamide (5aa)**

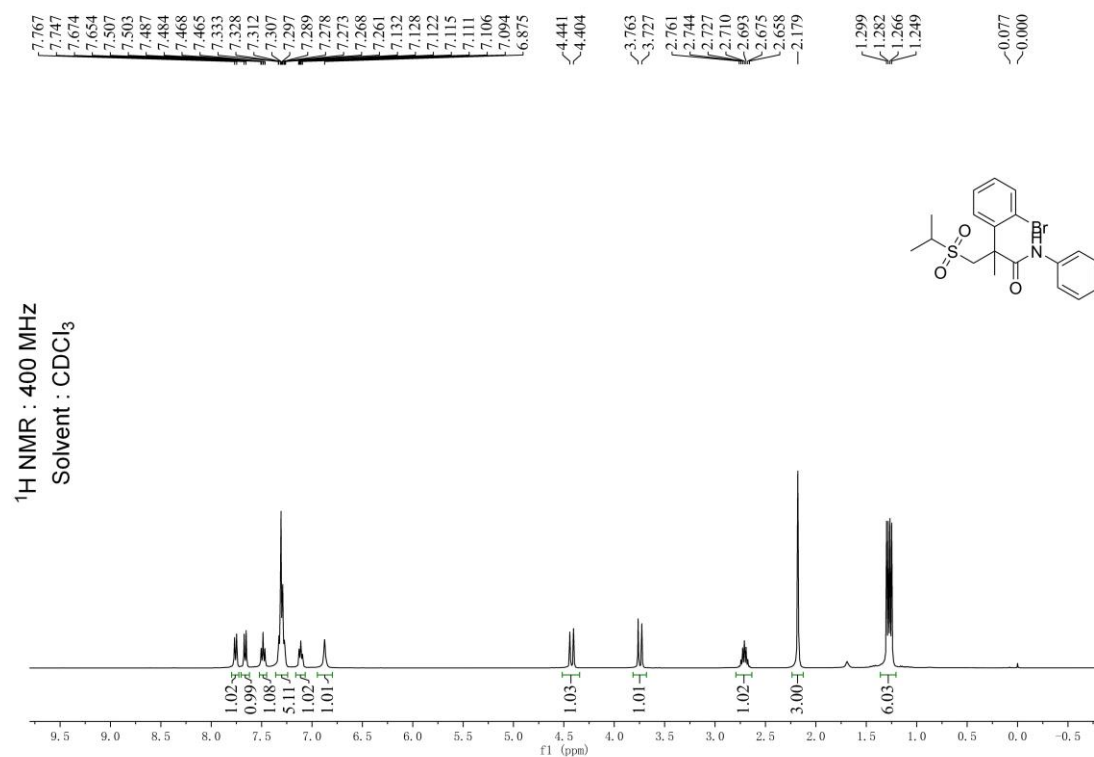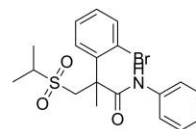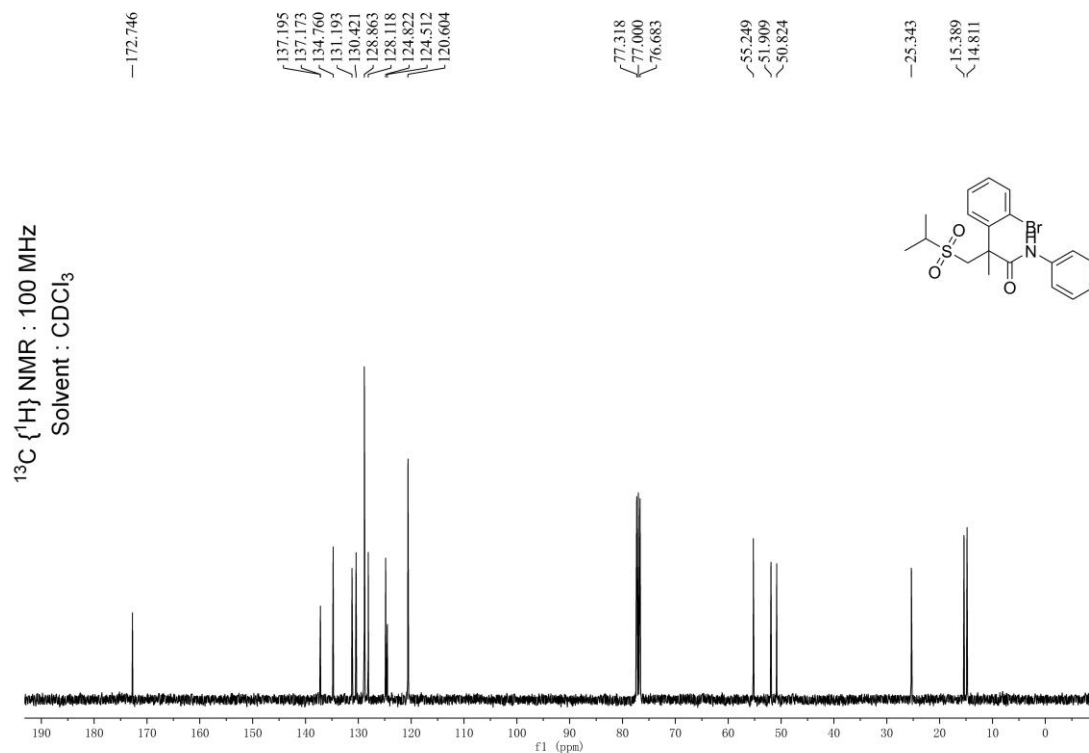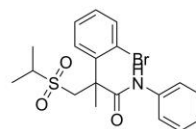

## 2-(2-bromophenyl)-3-(isopropylsulfonyl)-2-methyl-N-(p-tolyl)propanamide (5ba)

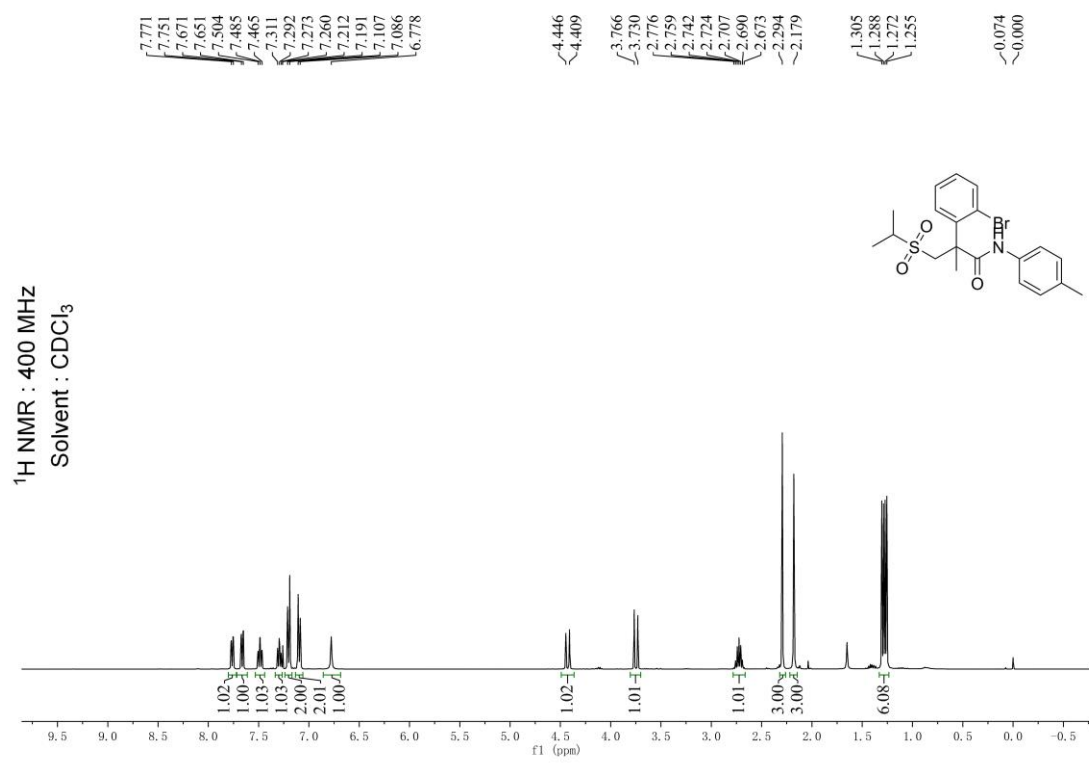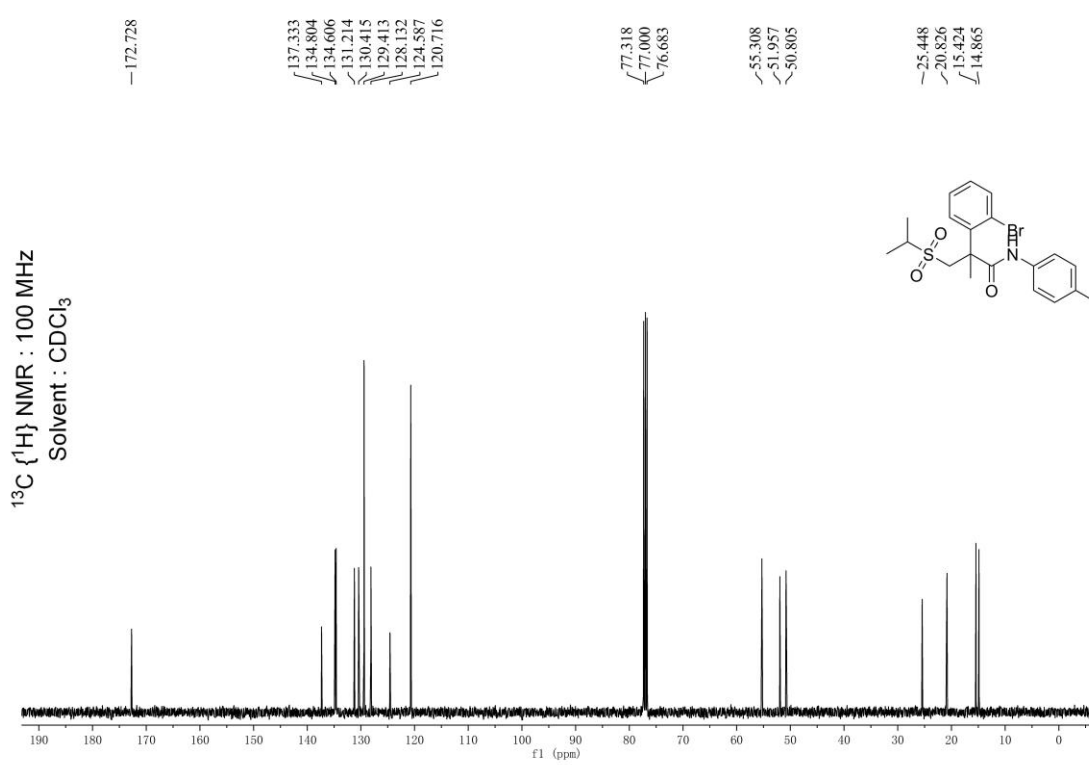

**2-(2-bromophenyl)-N-(4-fluorophenyl)-3-(isopropylsulfonyl)-2-methylpropanamide (5ca)**

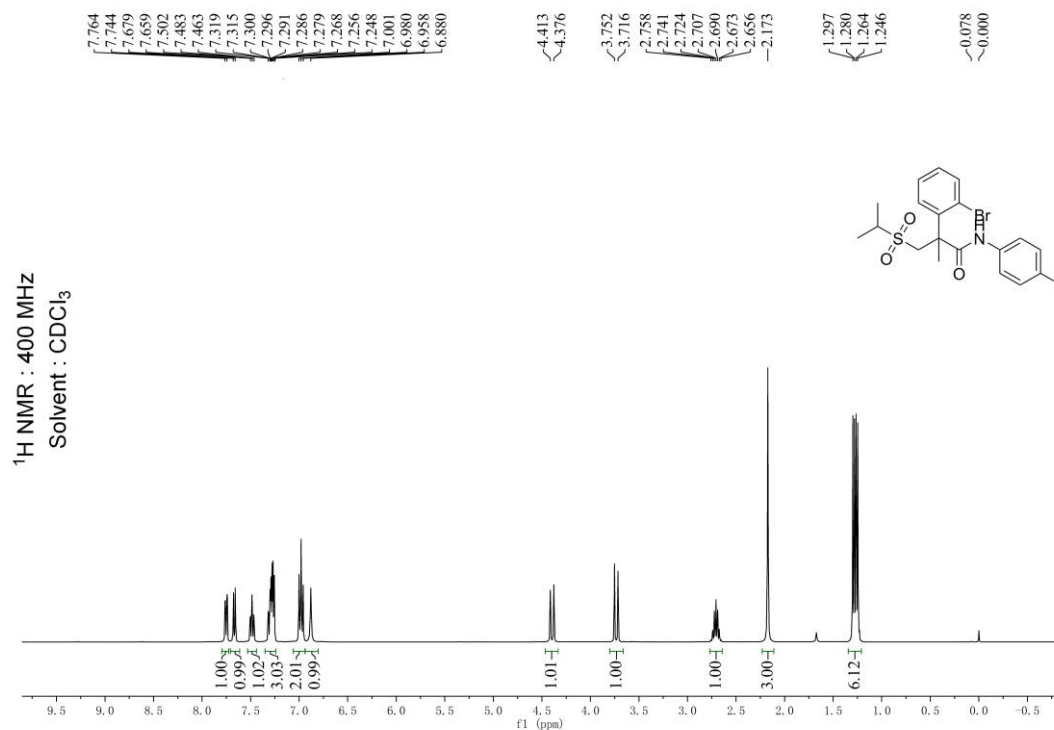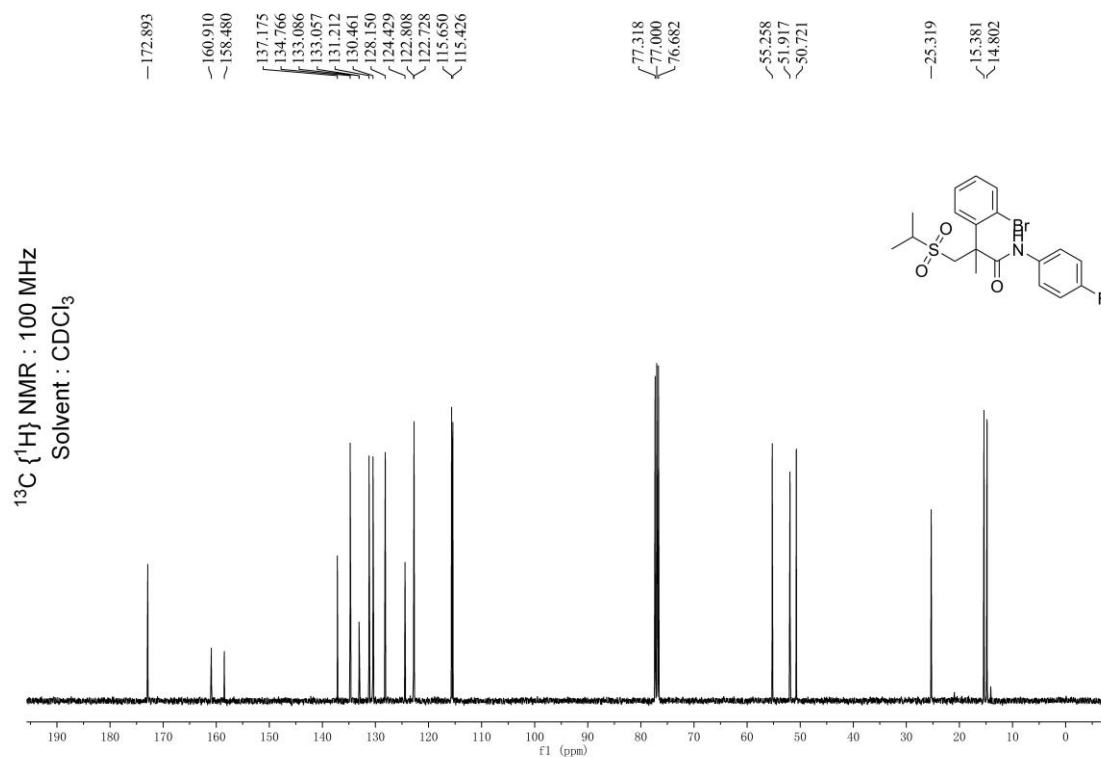

<sup>19</sup>F NMR : 282 MHz  
Solvent : CDCl<sub>3</sub>

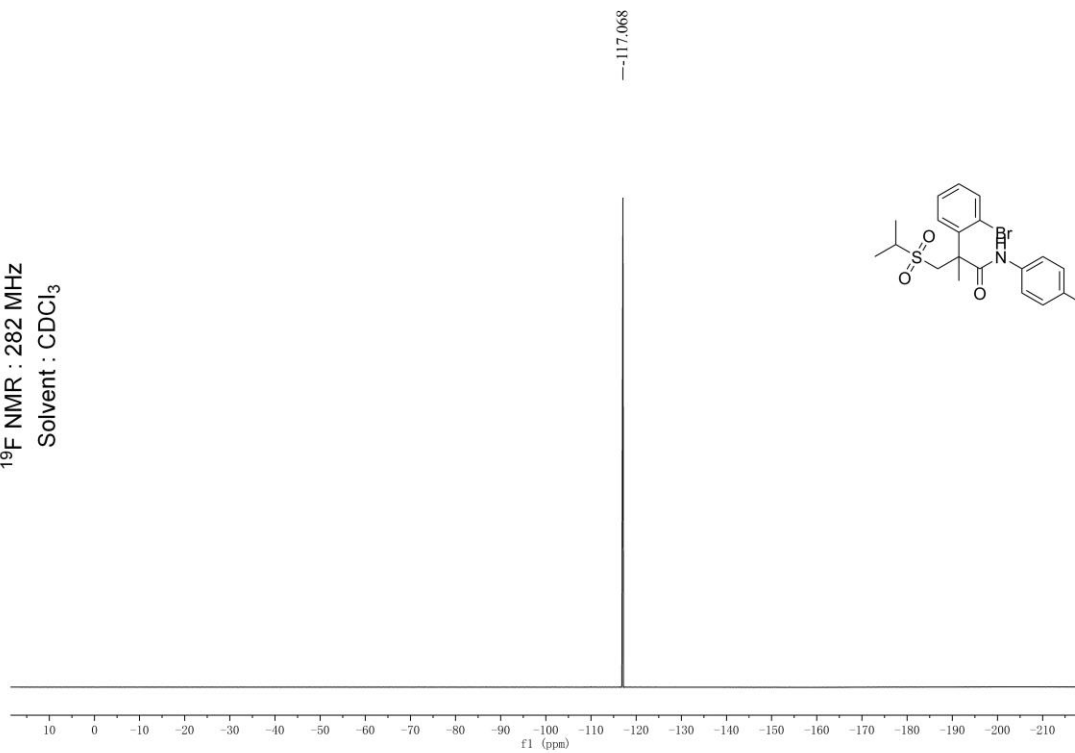

## 2-(2-bromophenyl)-3-(isopropylsulfonyl)-2-methyl-N-(m-tolyl)propanamide (5da)

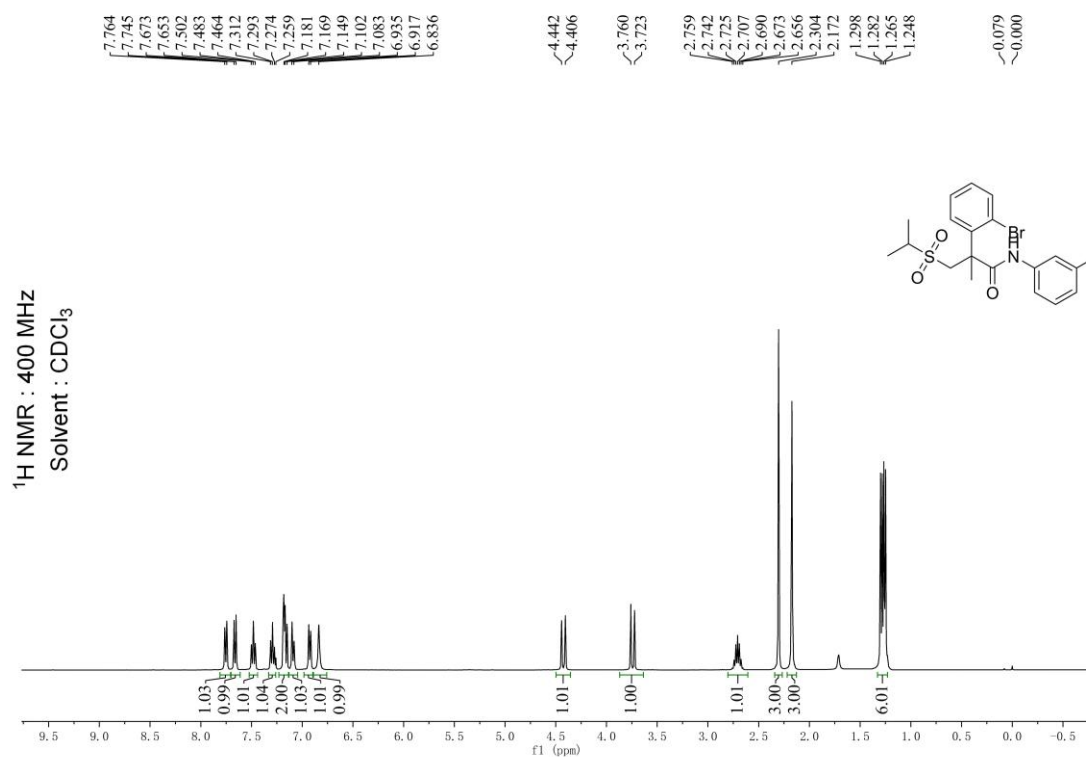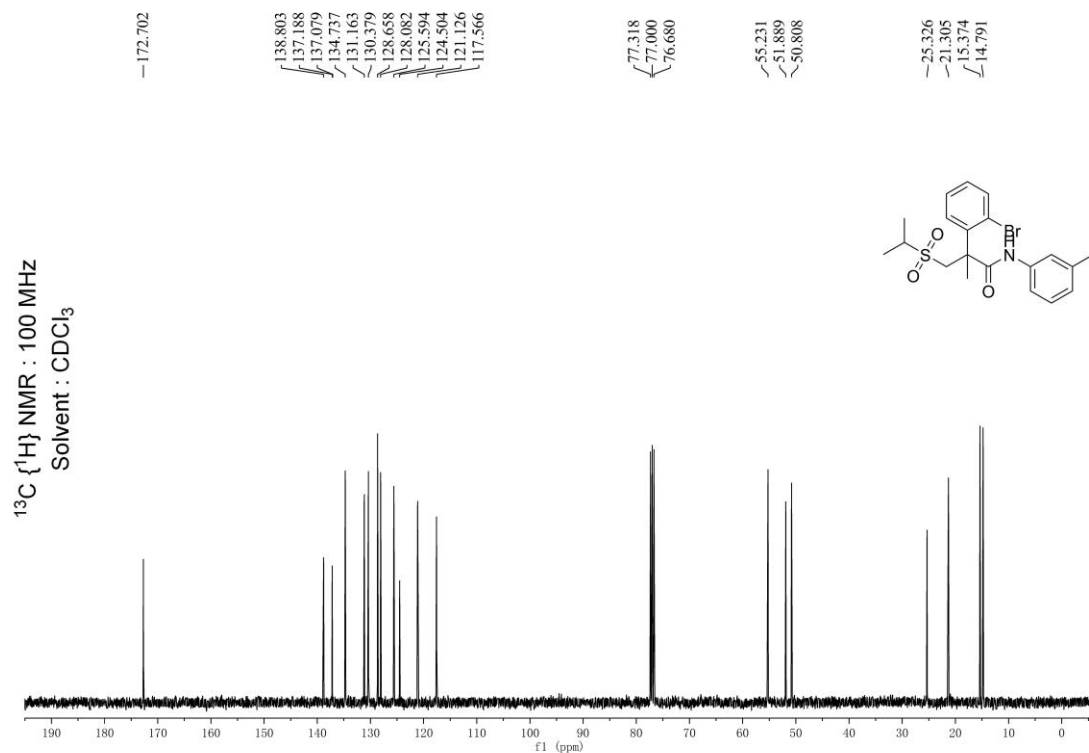

## 2-(2-bromophenyl)-N-(3-bromophenyl)-3-(isopropylsulfonyl)-2-methylpropanamide (5ea)

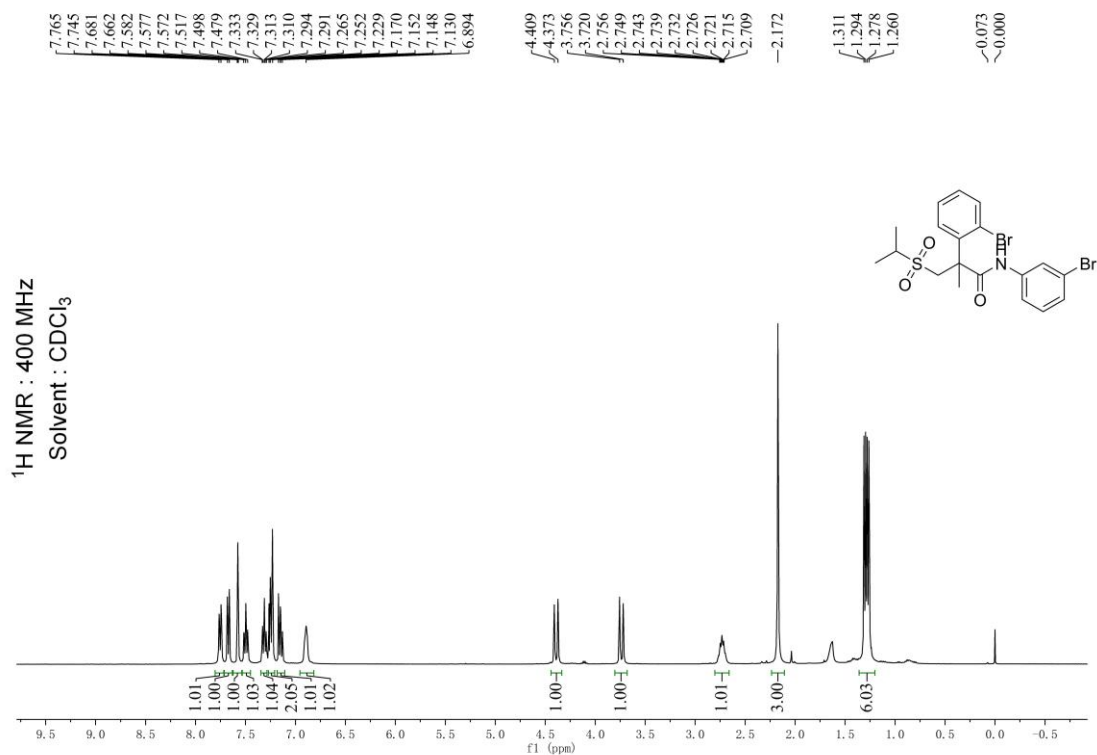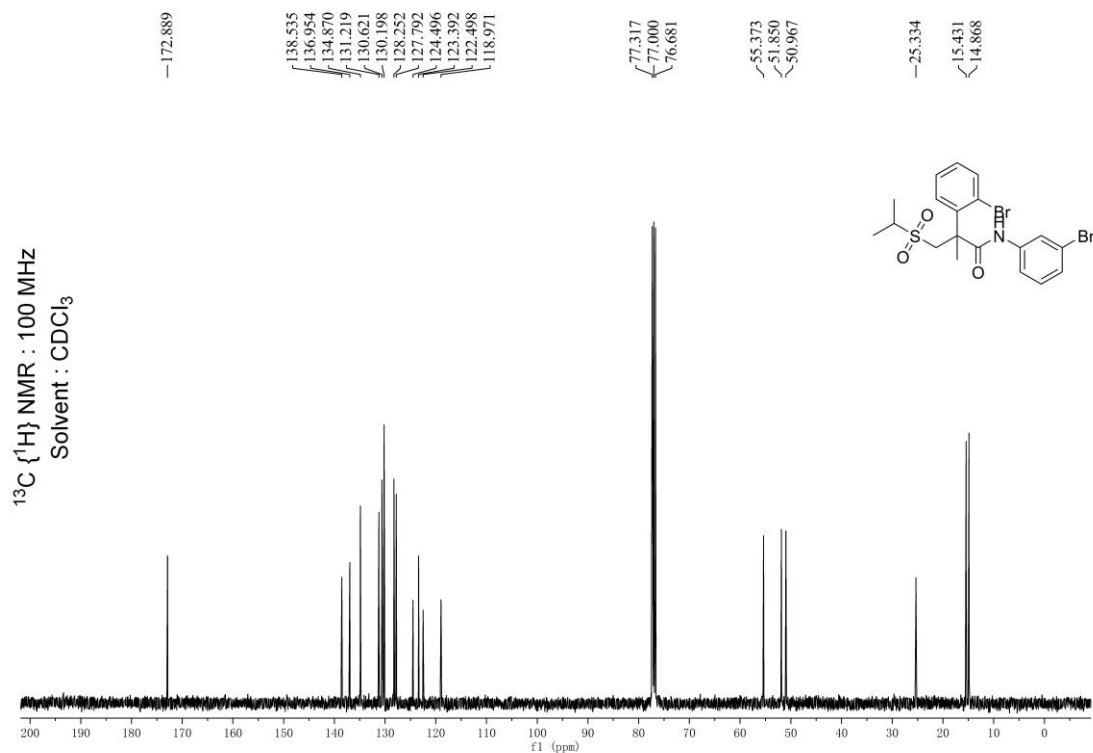

## 2-(2-bromophenyl)-3-(isopropylsulfonyl)-2-methyl-N-(o-tolyl)propanamide (5fa)

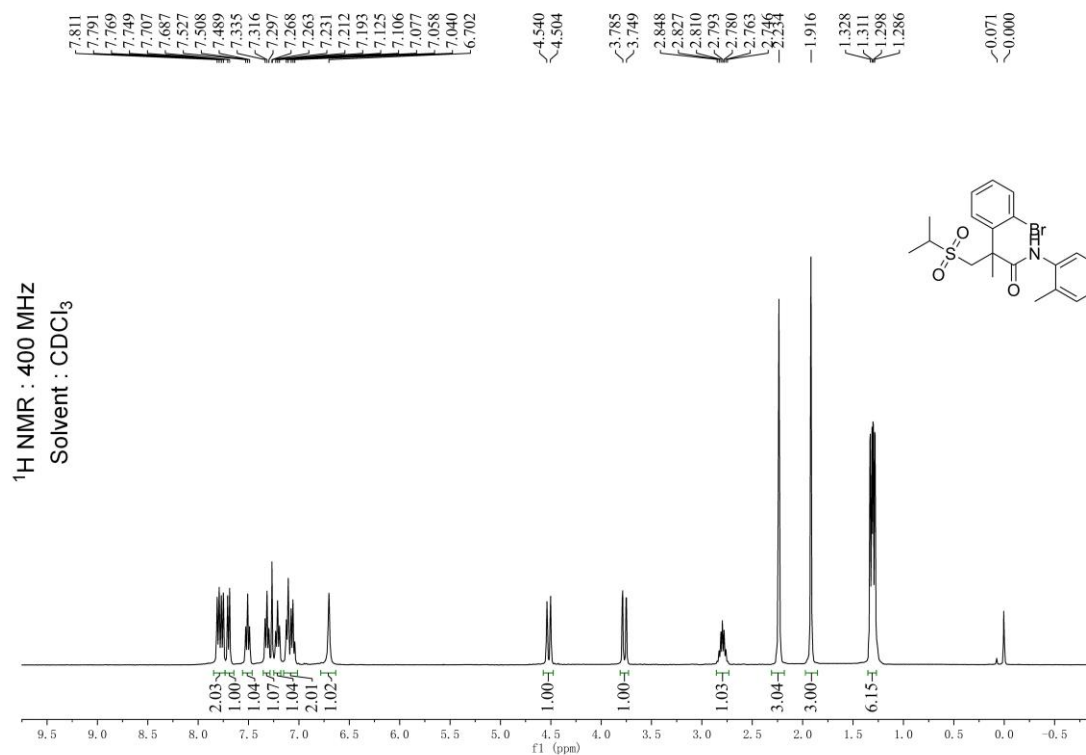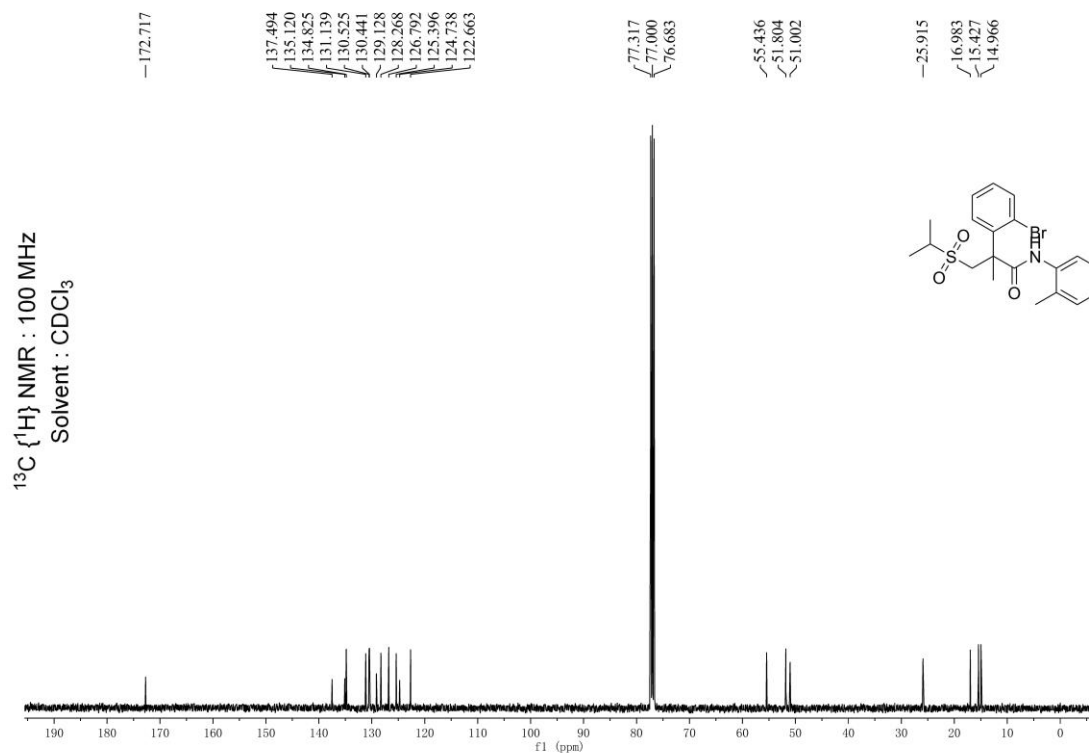

**2-(2-bromophenyl)-N-(2-chlorophenyl)-3-(isopropylsulfonyl)-2-methylpropanamide (5ga)**

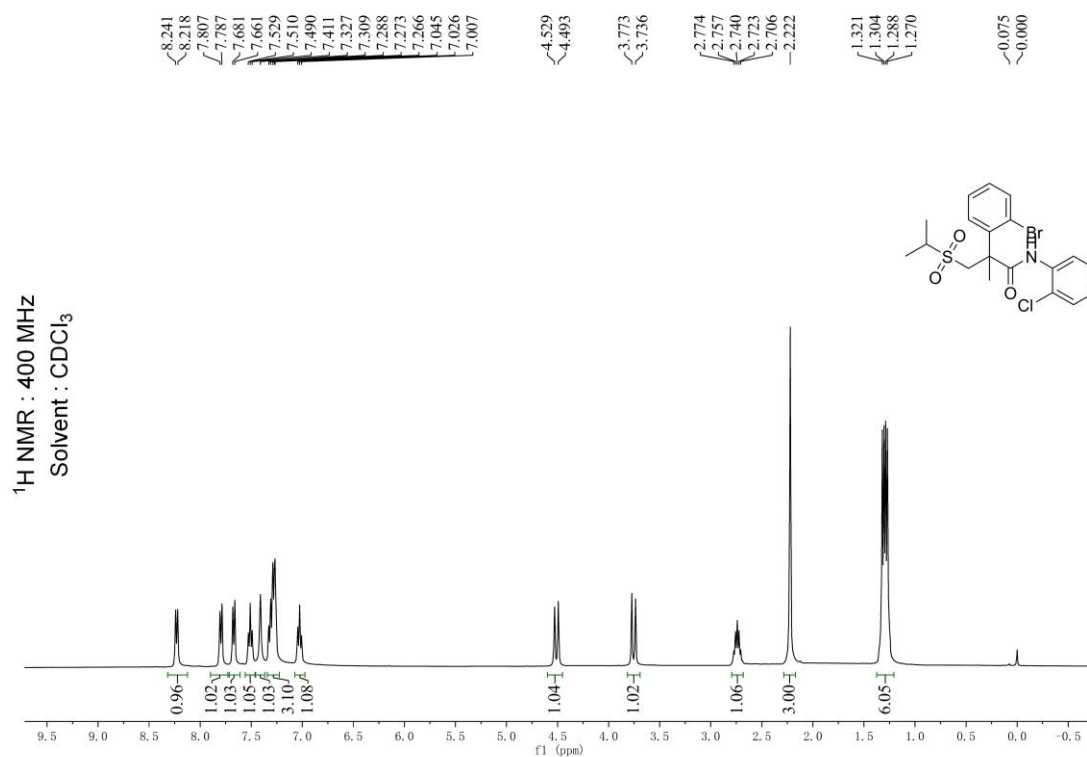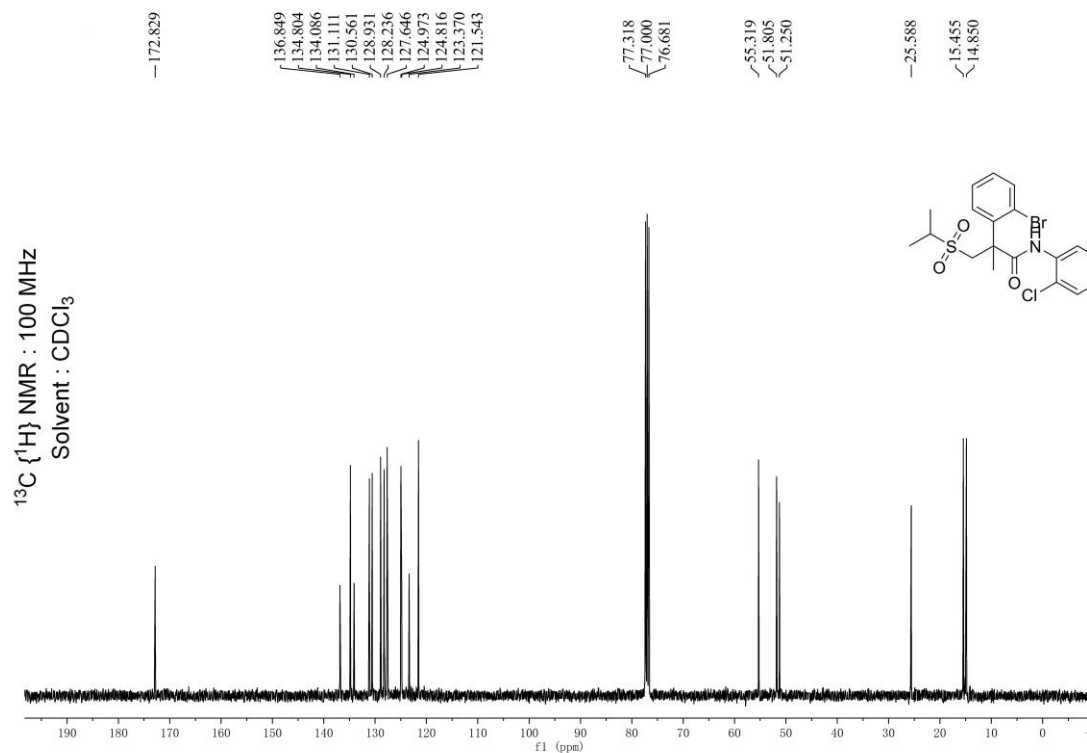



# 3-(isopropylsulfonyl)-2-methyl-N-phenyl-2-(p-tolyl)propanamide

(5ha)

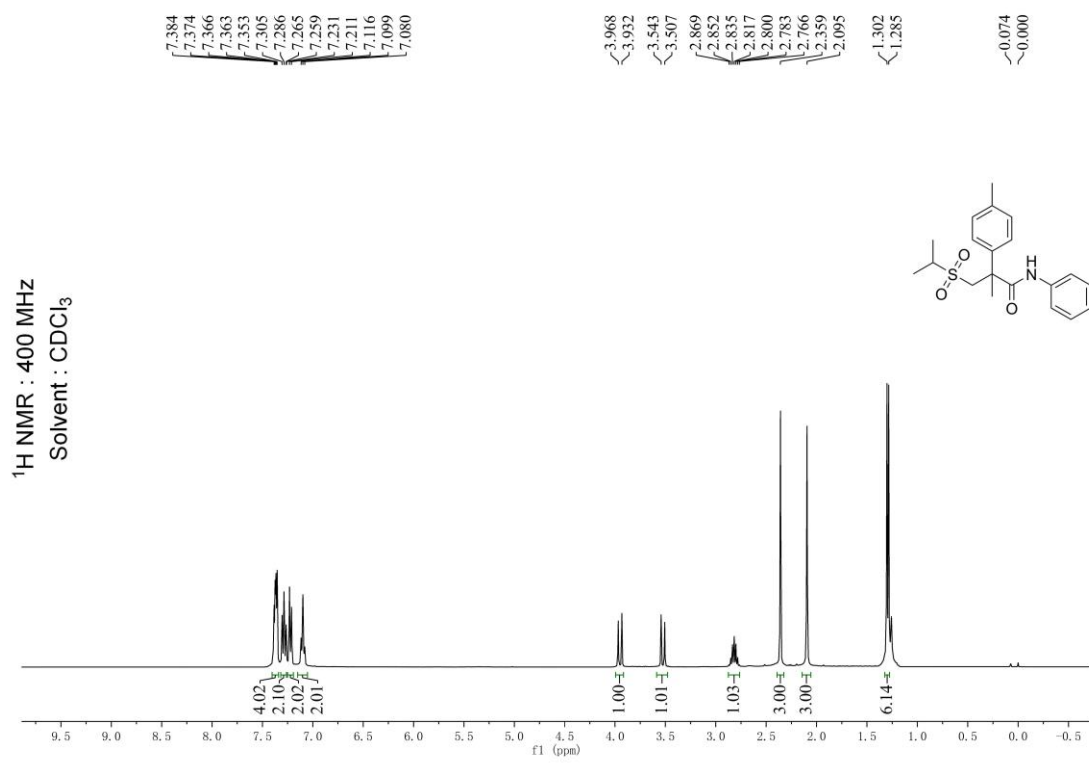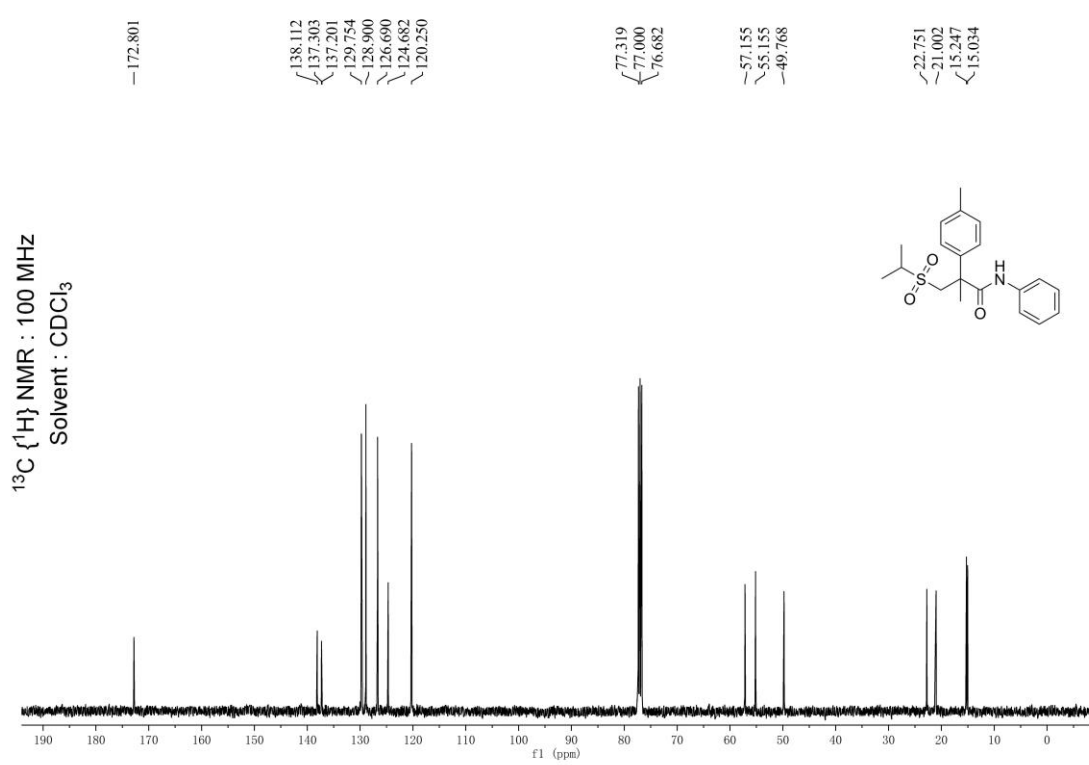

**3-(isopropylsulfonyl)-2-(4-methoxyphenyl)-2-methyl-N-phenylpropanamide (5ia)**

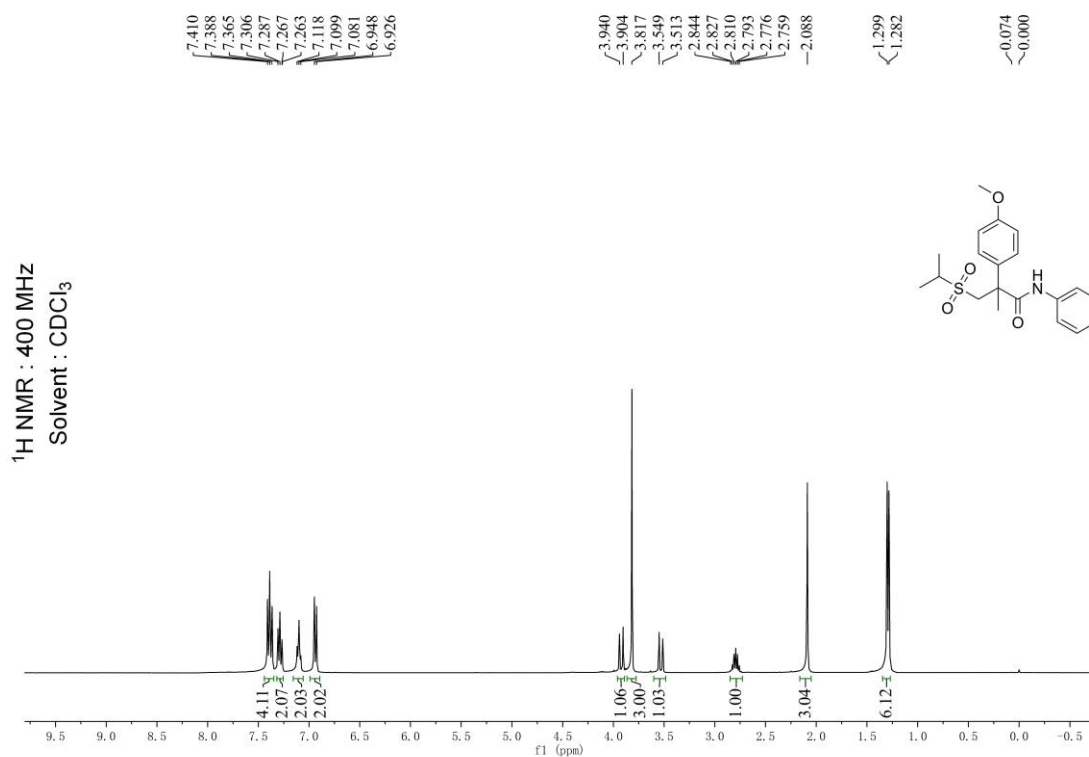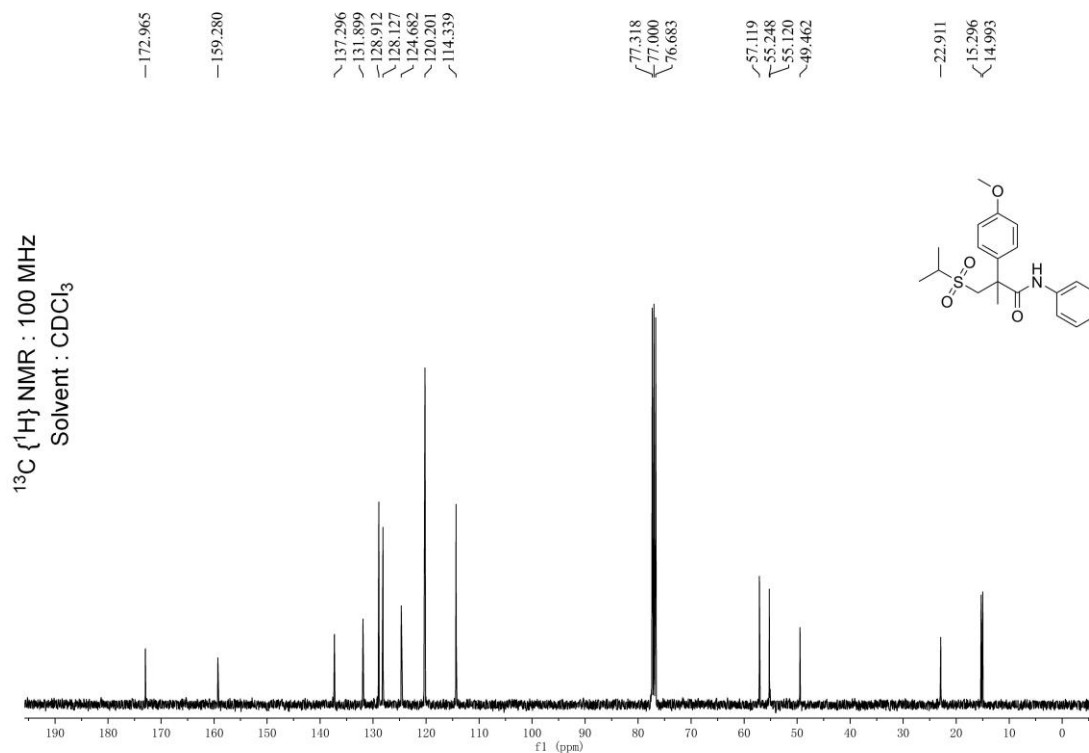

**2-(4-(tert-butyl)phenyl)-3-(isopropylsulfonyl)-2-methyl-N-phenylpropanamide (5ja)**

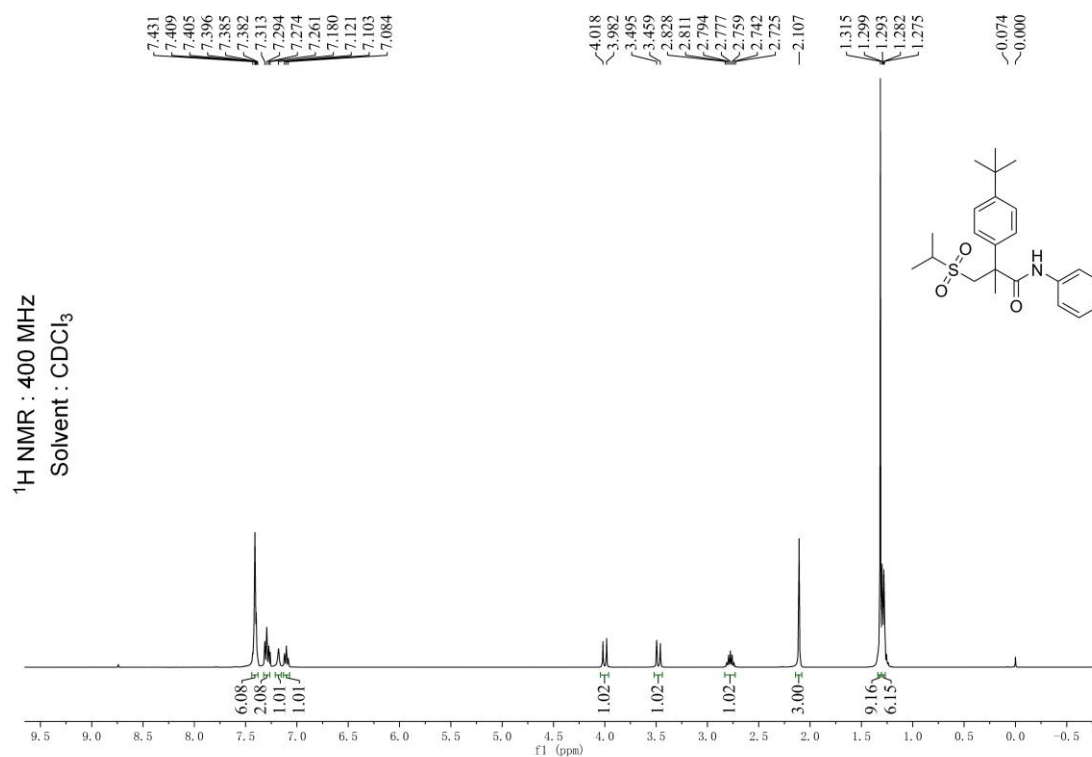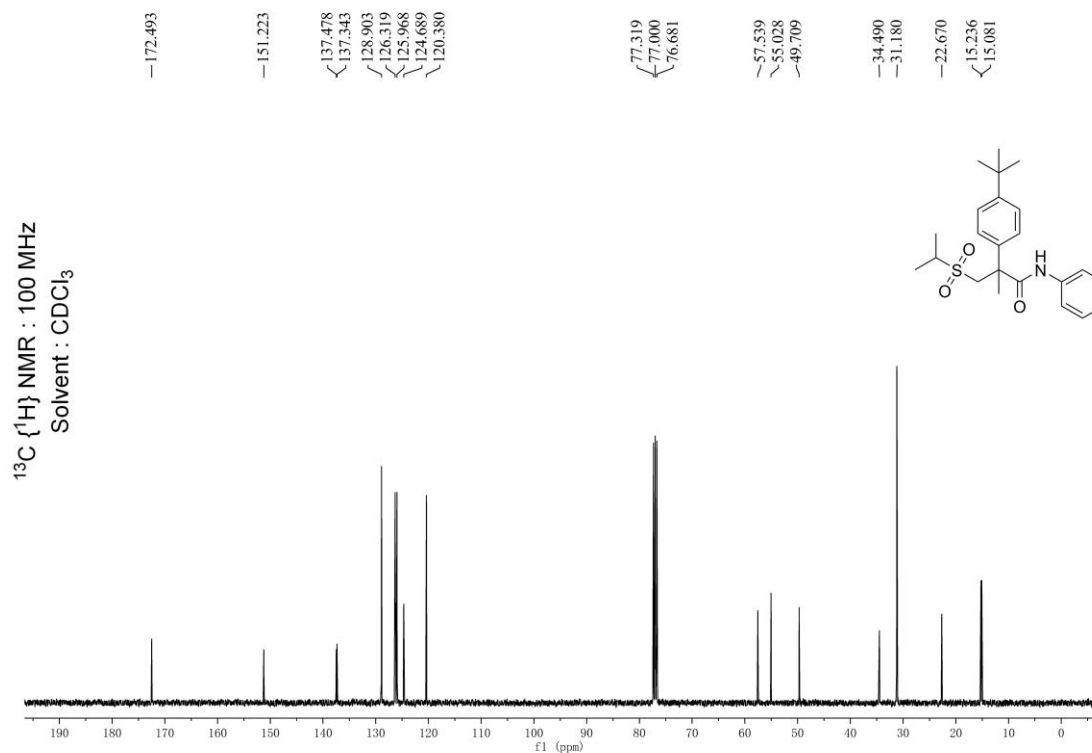

## 2-(4-fluorophenyl)-3-(isopropylsulfonyl)-2-methyl-N-phenylpropanamide (5ka)

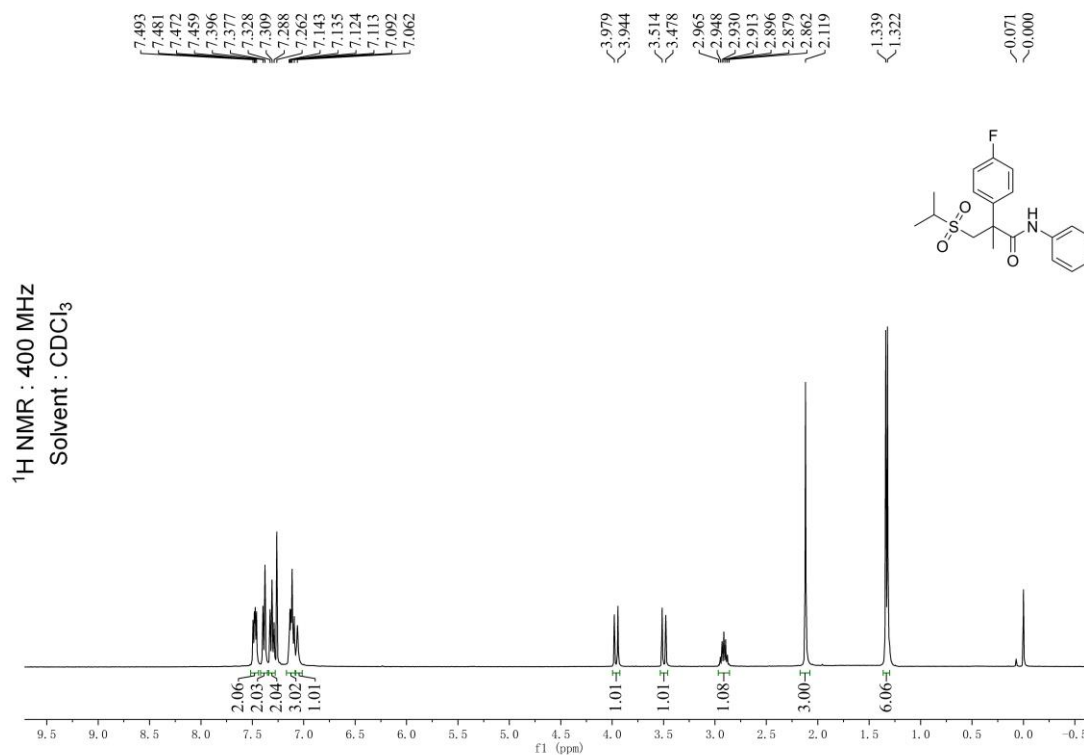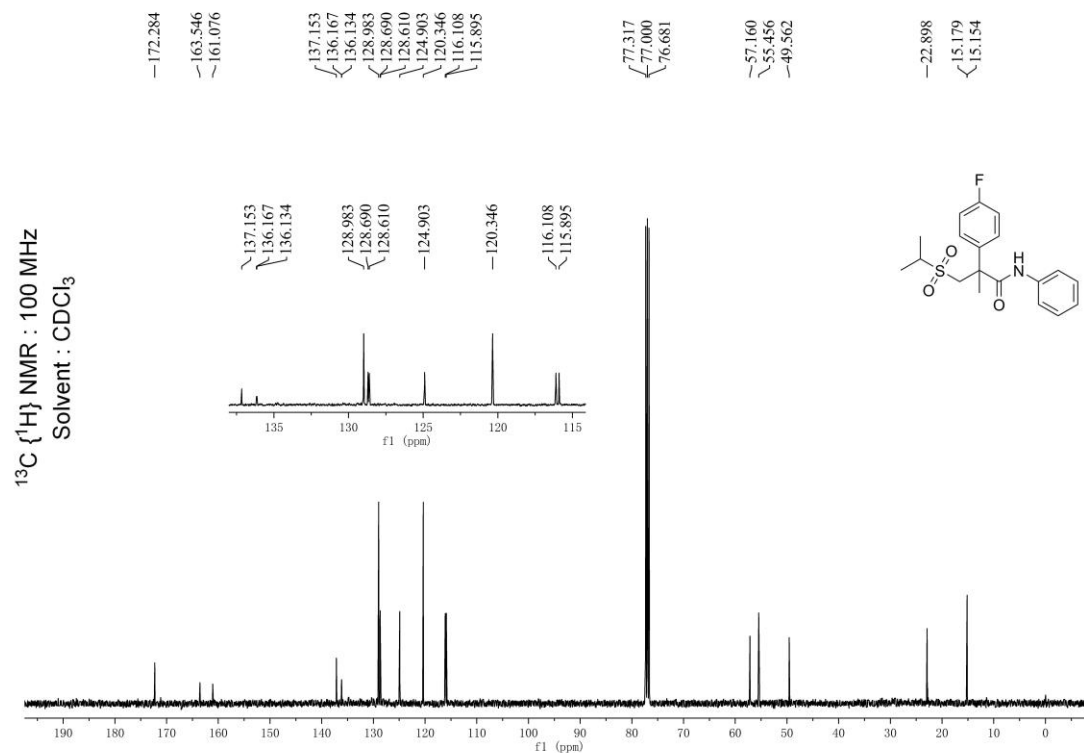

<sup>19</sup>F NMR : 282 MHz  
Solvent : CDCl<sub>3</sub>

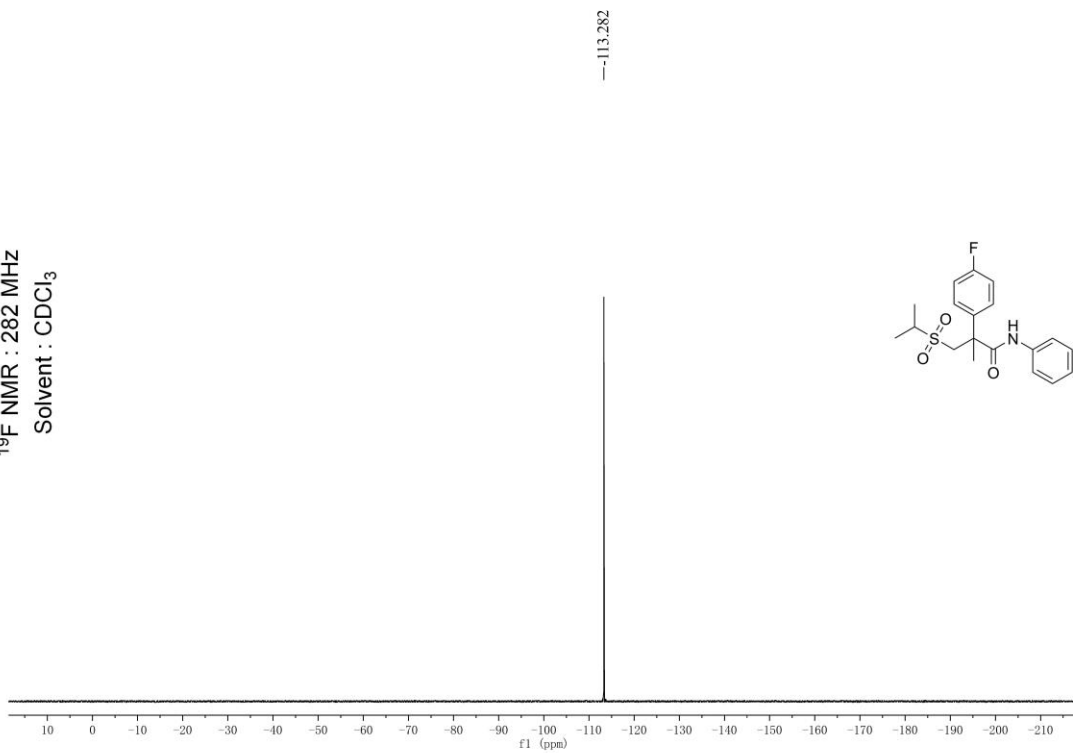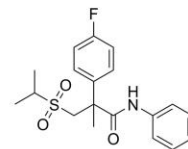

**2-(4-chlorophenyl)-3-(isopropylsulfonyl)-2-methyl-N-phenylpropanamide (5la)**

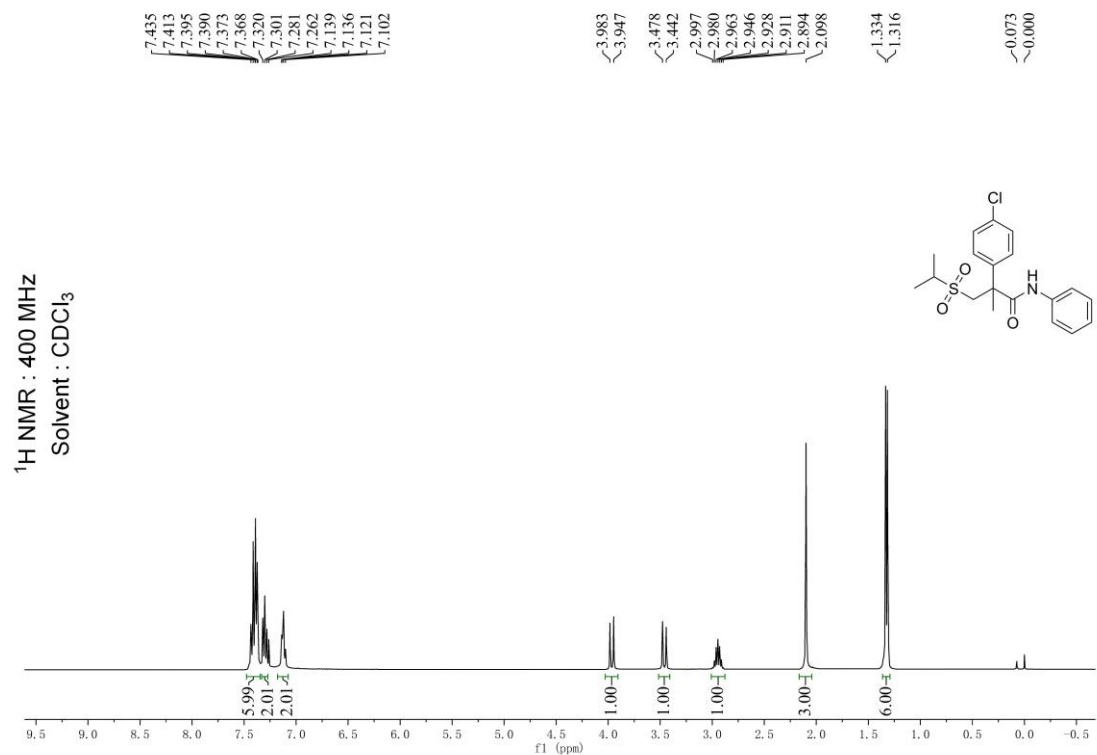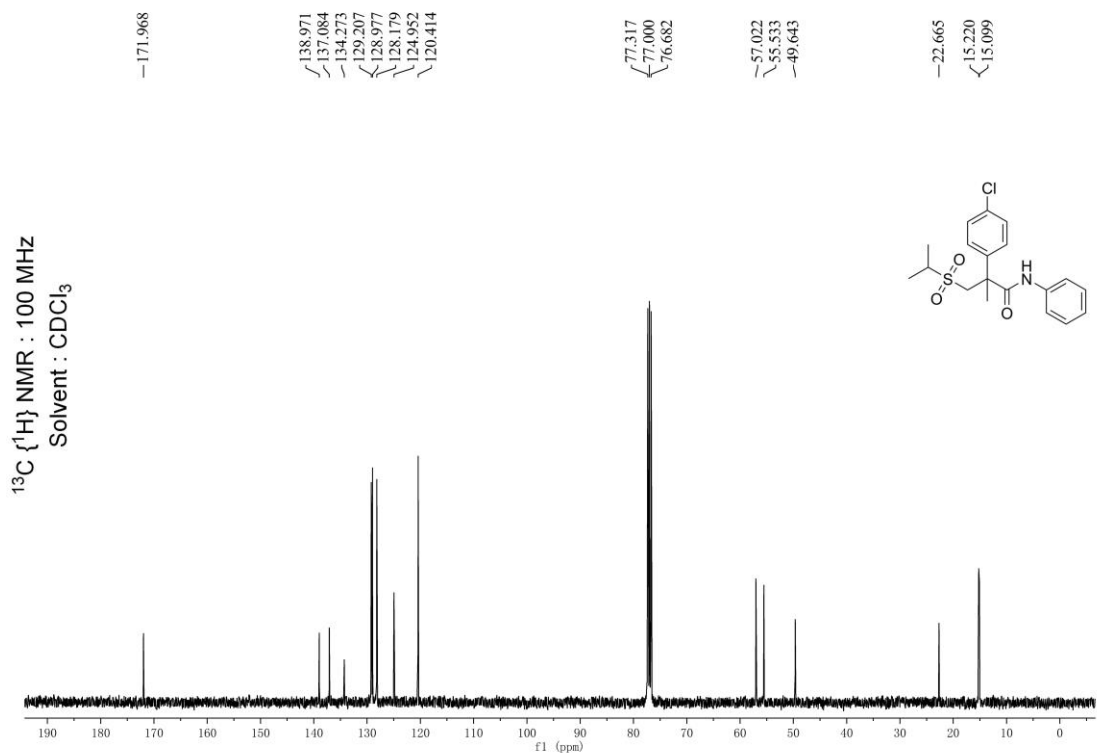

## 2-(4-bromophenyl)-3-(isopropylsulfonyl)-2-methyl-N-phenylpropanamide (5ma)

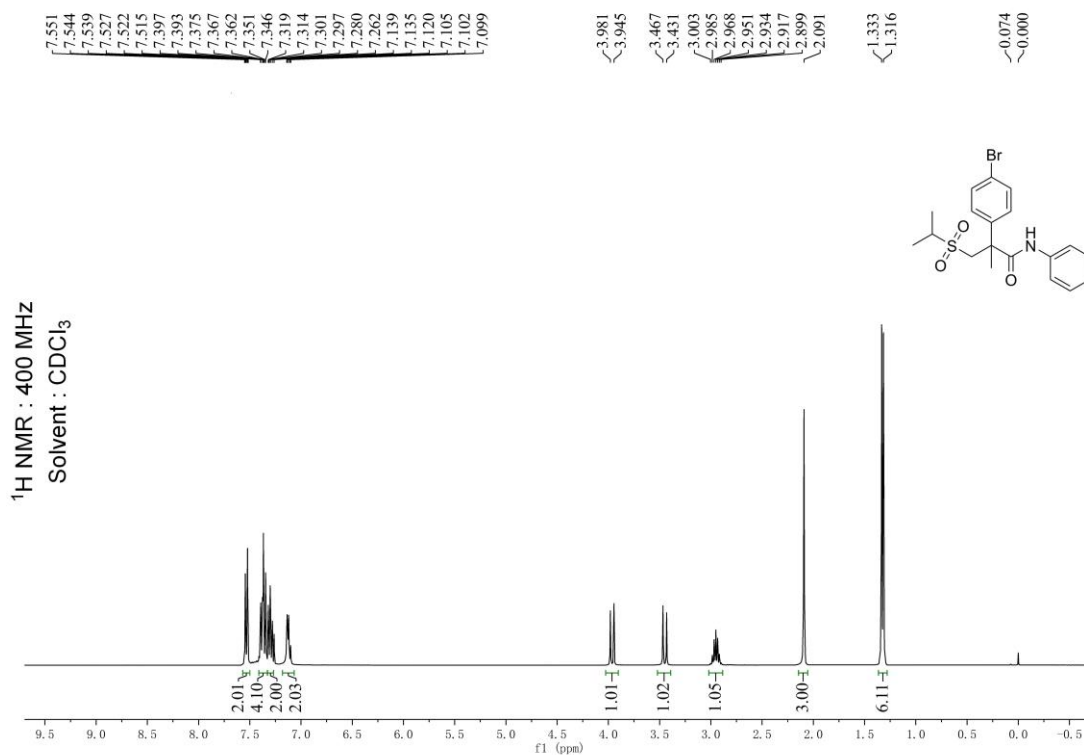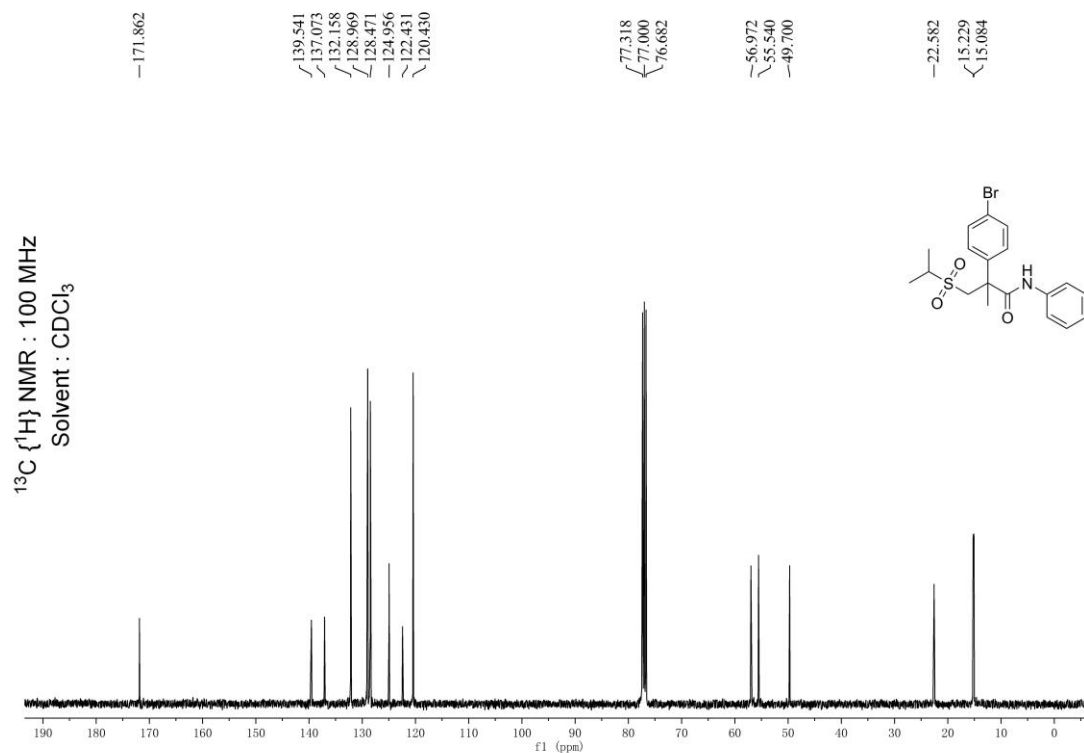

**3-(isopropylsulfonyl)-2-methyl-N-phenyl-2-(4-(trifluoromethyl)phenyl)propanamide(5na)**

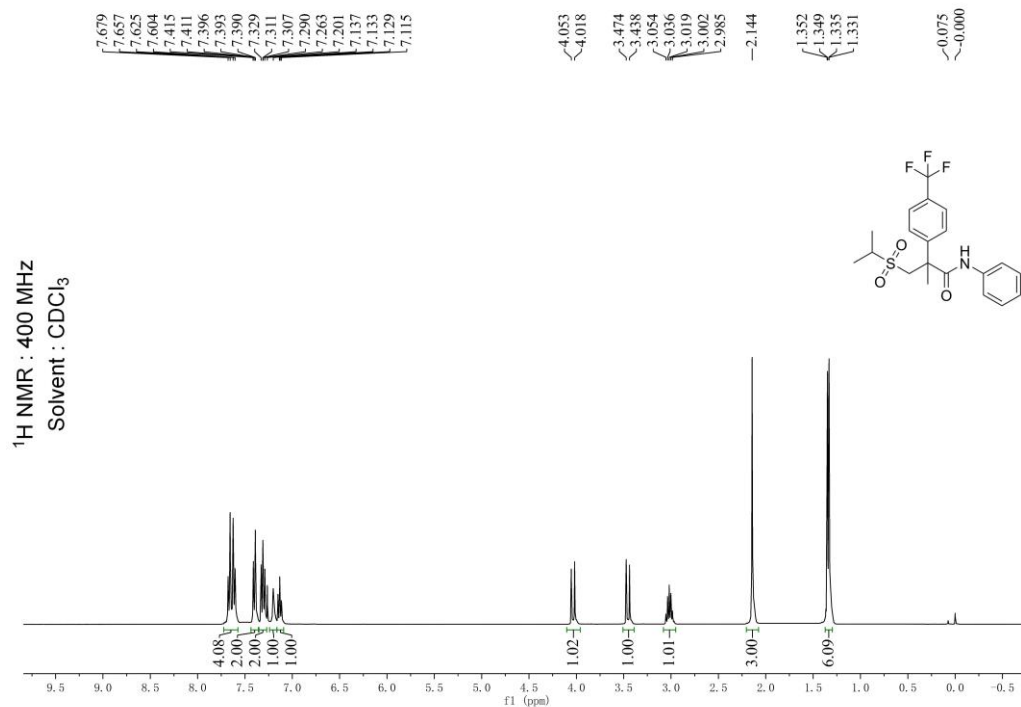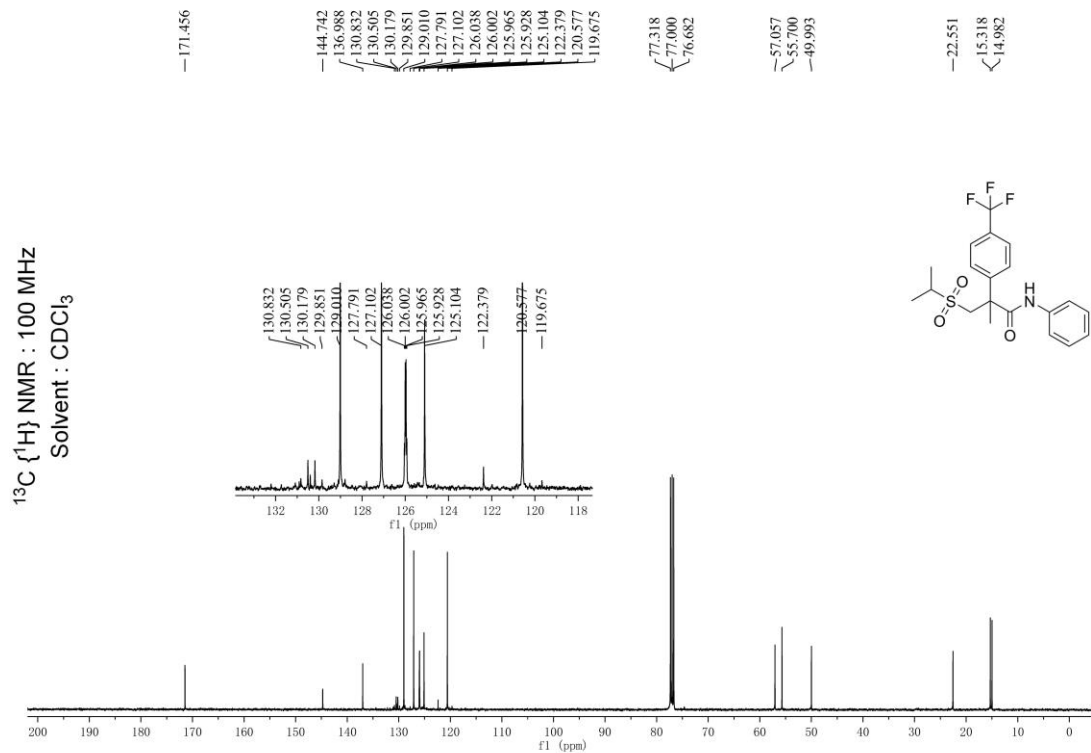



<sup>19</sup>F NMR : 282 MHz  
Solvent : CDCl<sub>3</sub>

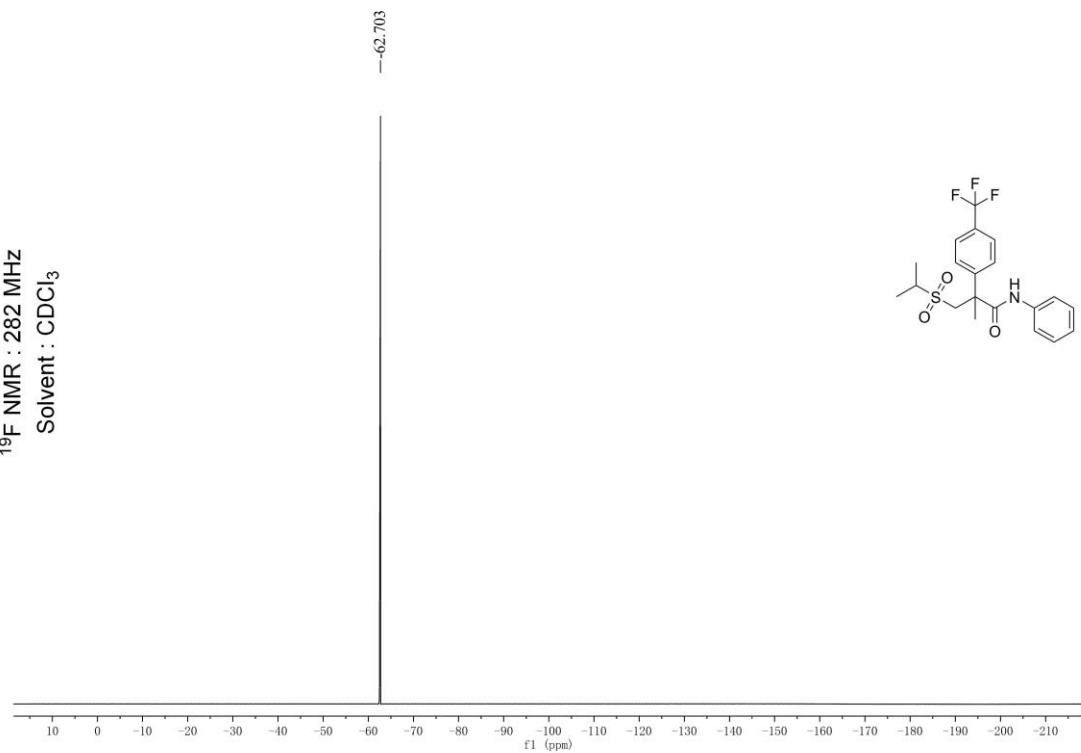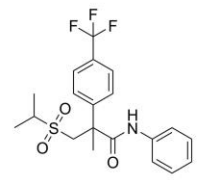

**2-(4-cyanophenyl)-3-(isopropylsulfonyl)-2-methyl-N-phenylpropanamide (50a)**

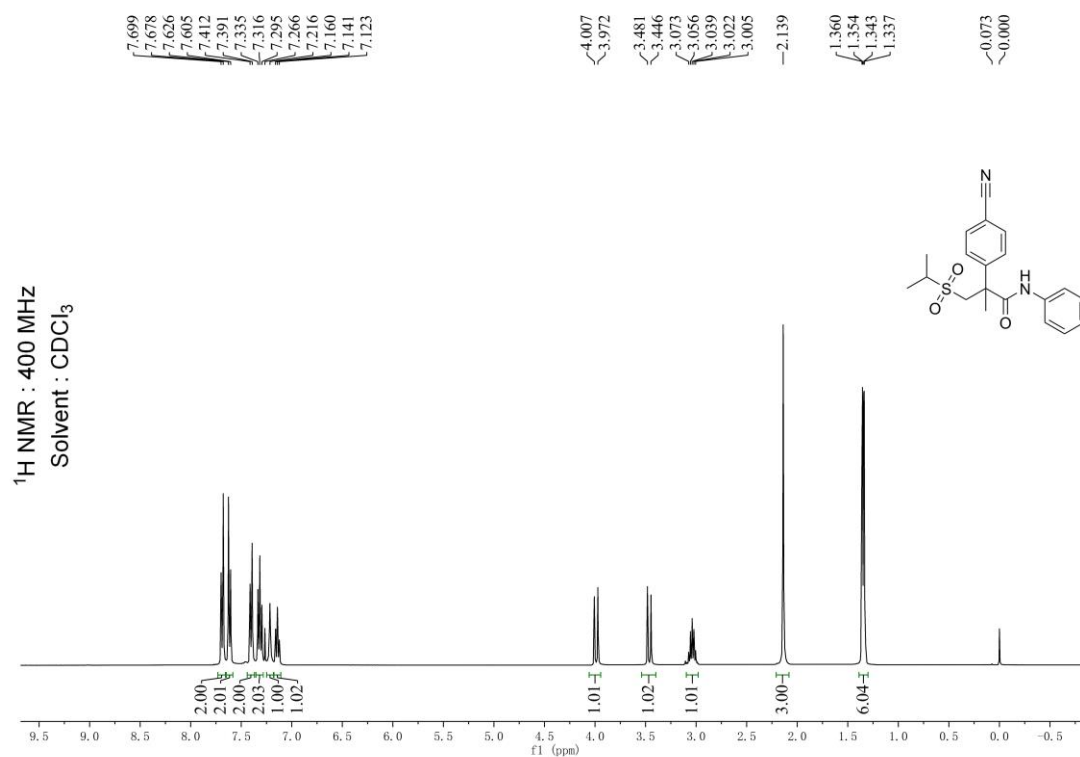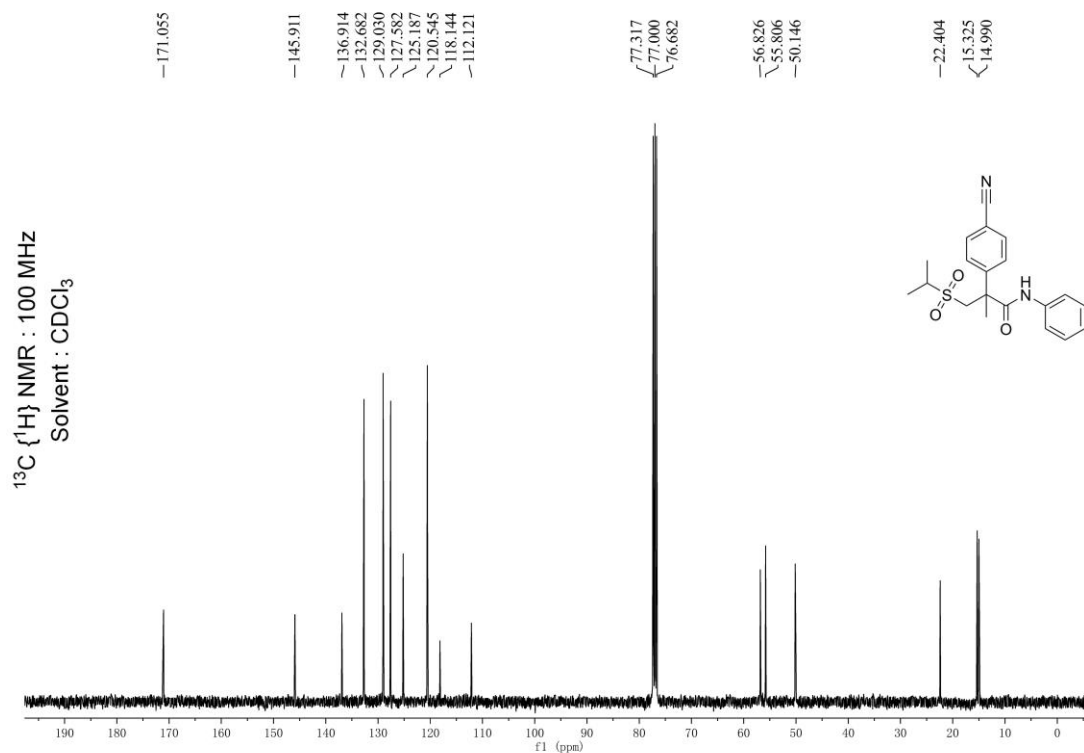

# 3-(isopropylsulfonyl)-2-methyl-N-phenyl-2-(m-tolyl)propanamide

(5pa)

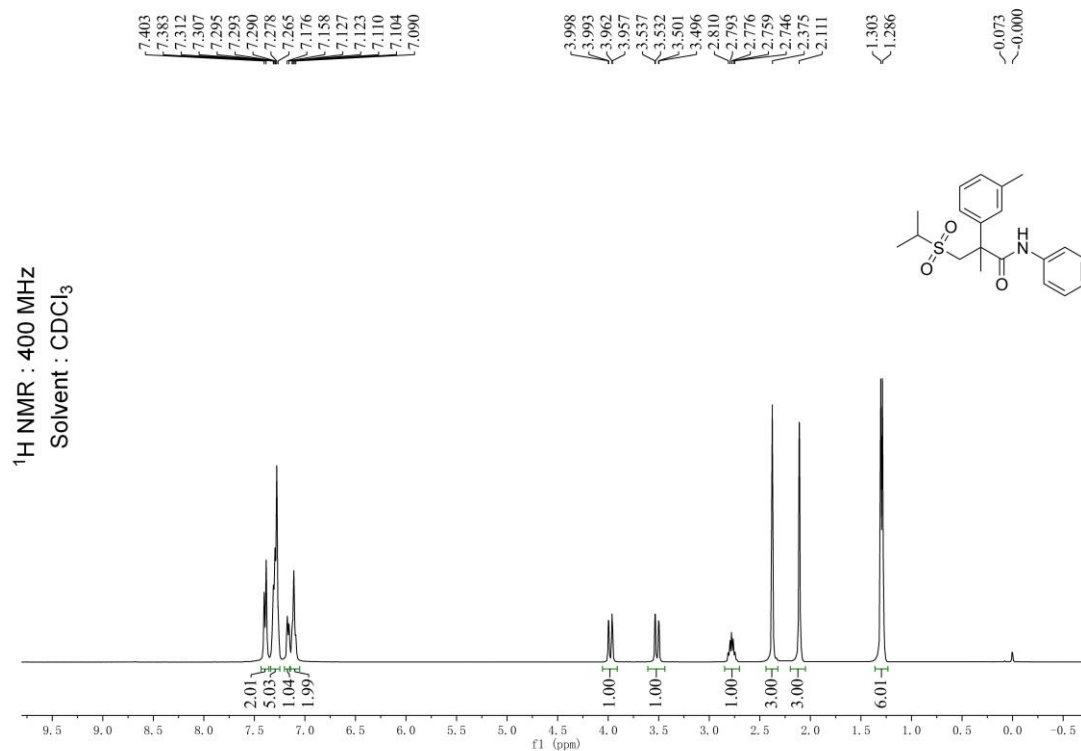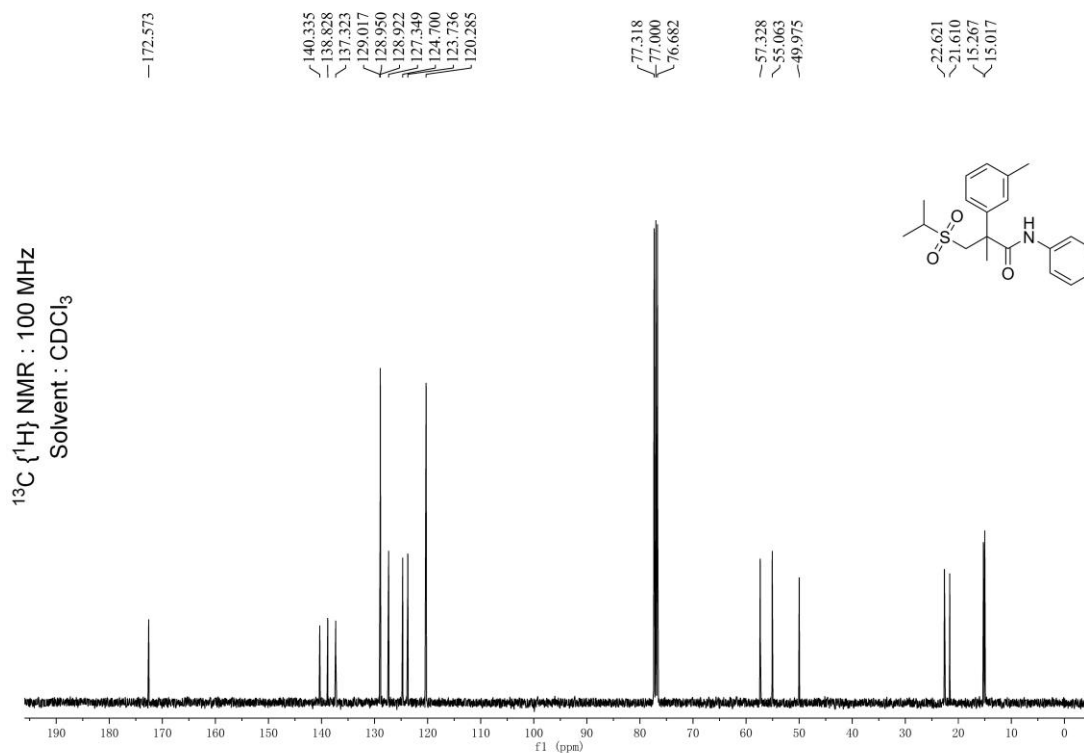

**2-(3-chlorophenyl)-3-(isopropylsulfonyl)-2-methyl-N-phenylpropanamide (5qa)**

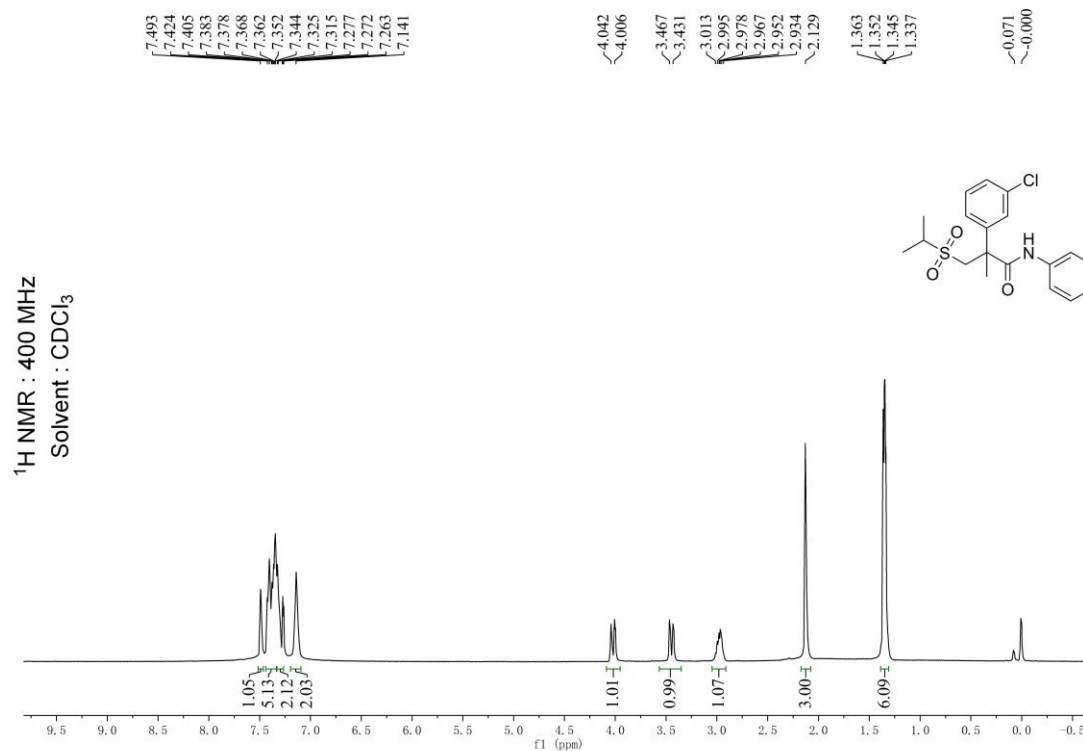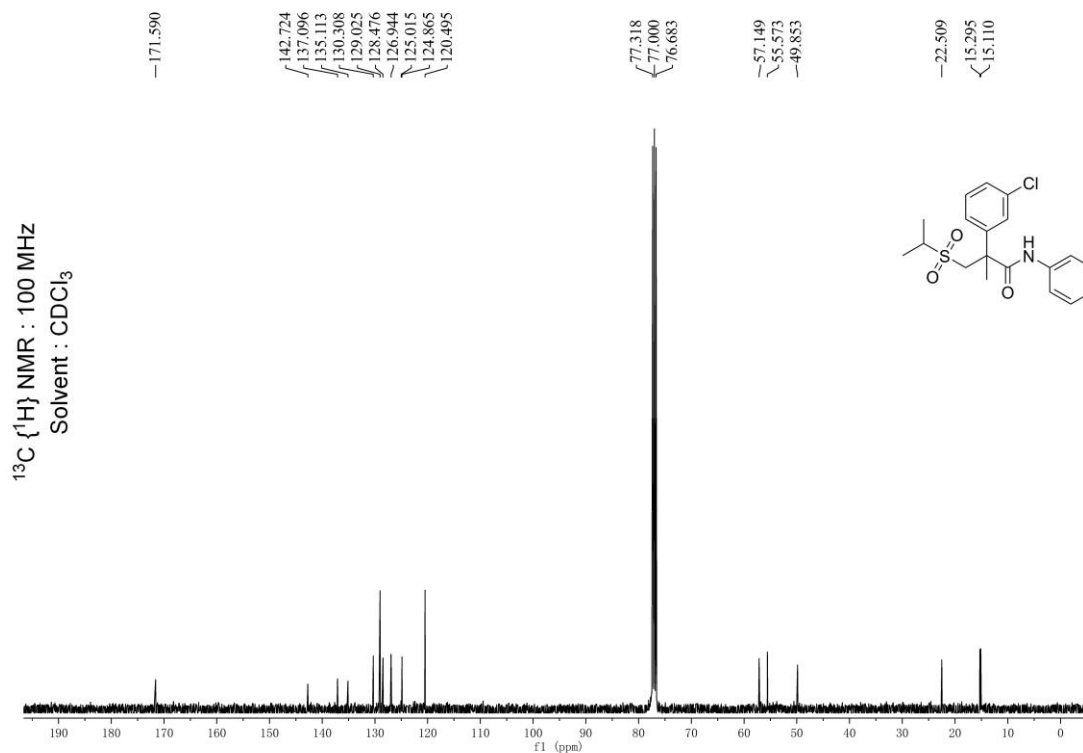

# 3-(isopropylsulfonyl)-2-methyl-N-phenyl-2-(o-tolyl)propanamide

(5ra)

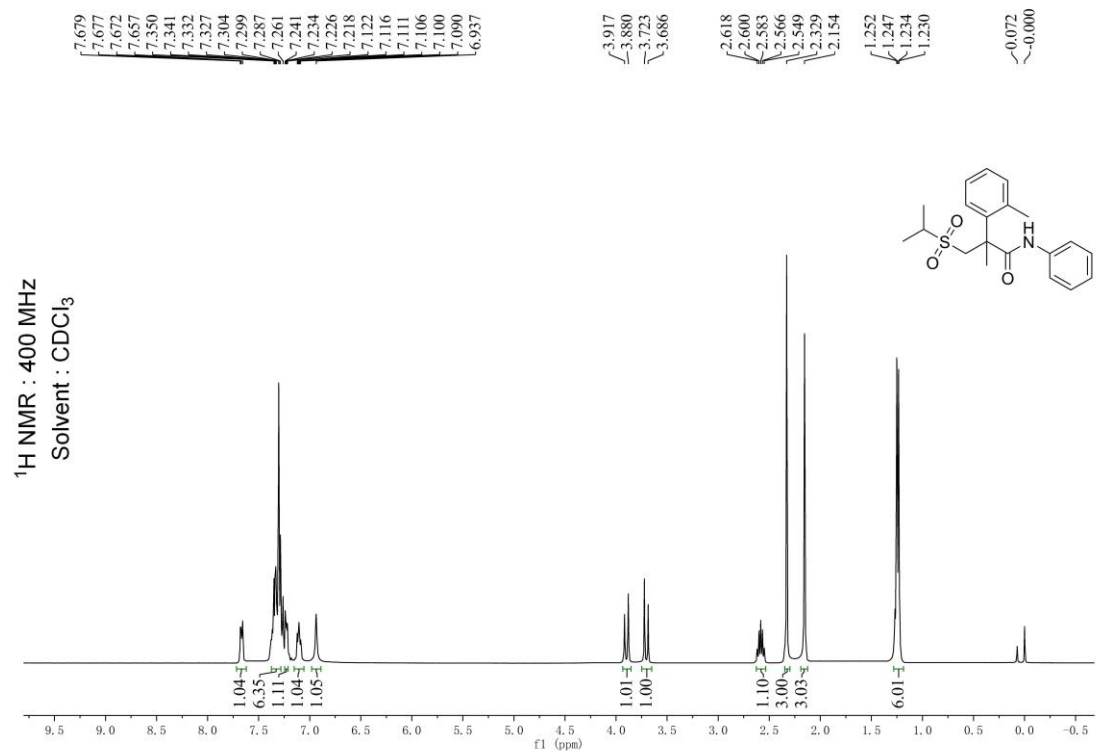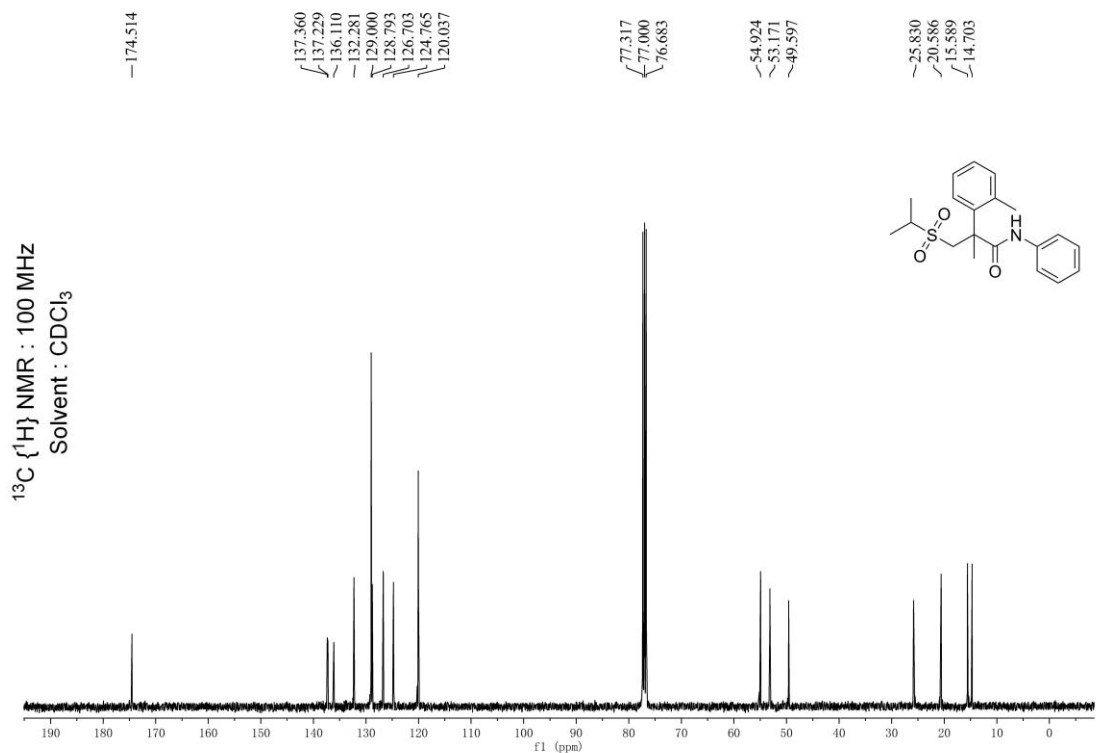

### 3-(isopropylsulfonyl)-2-methyl-N,2-diphenylpropanamide (5sa)

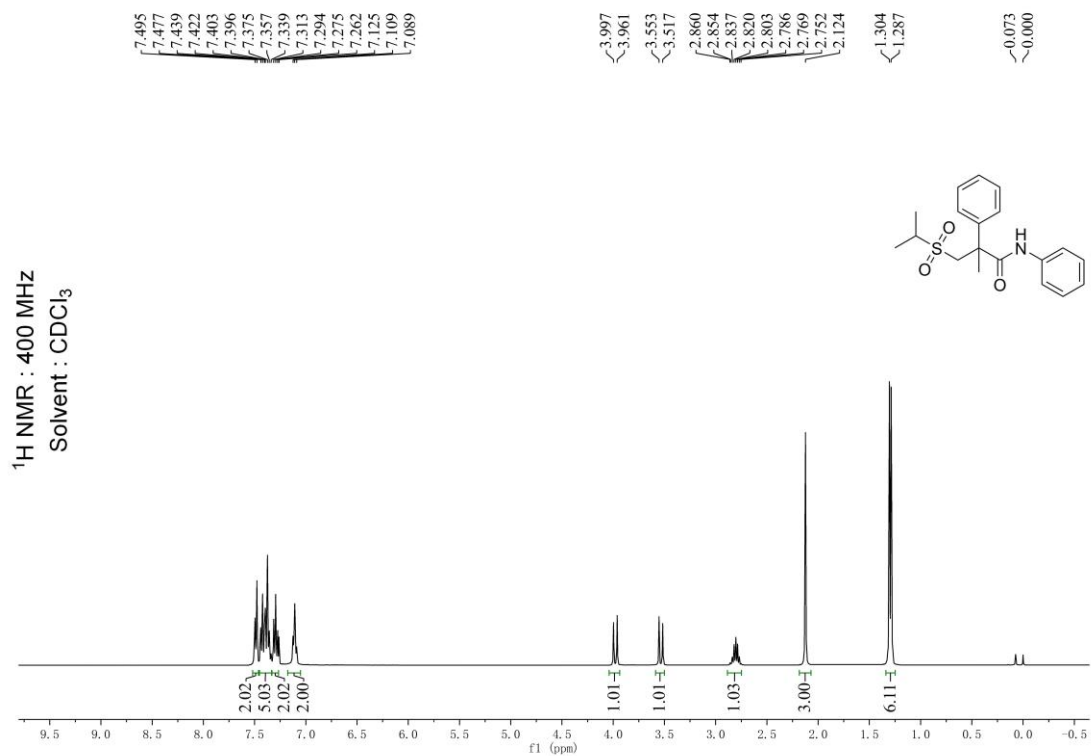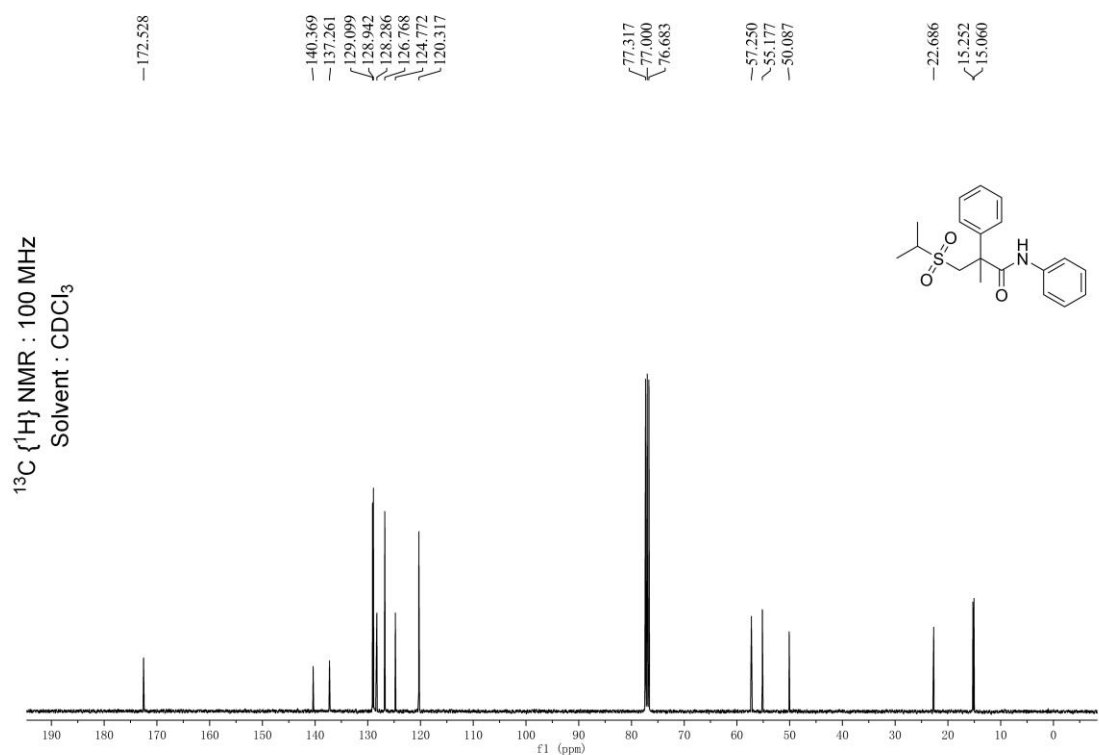

## 2-(2-bromophenyl)-3-(isopropylsulfonyl)-N-phenylpropanamide (5ta)

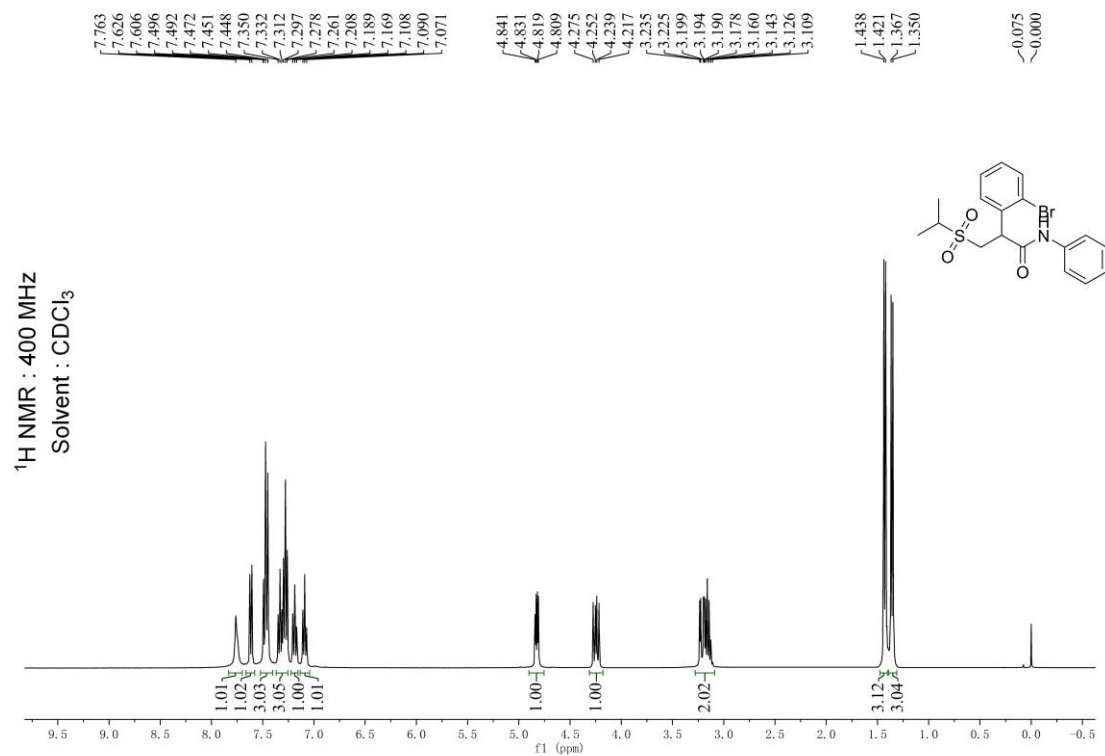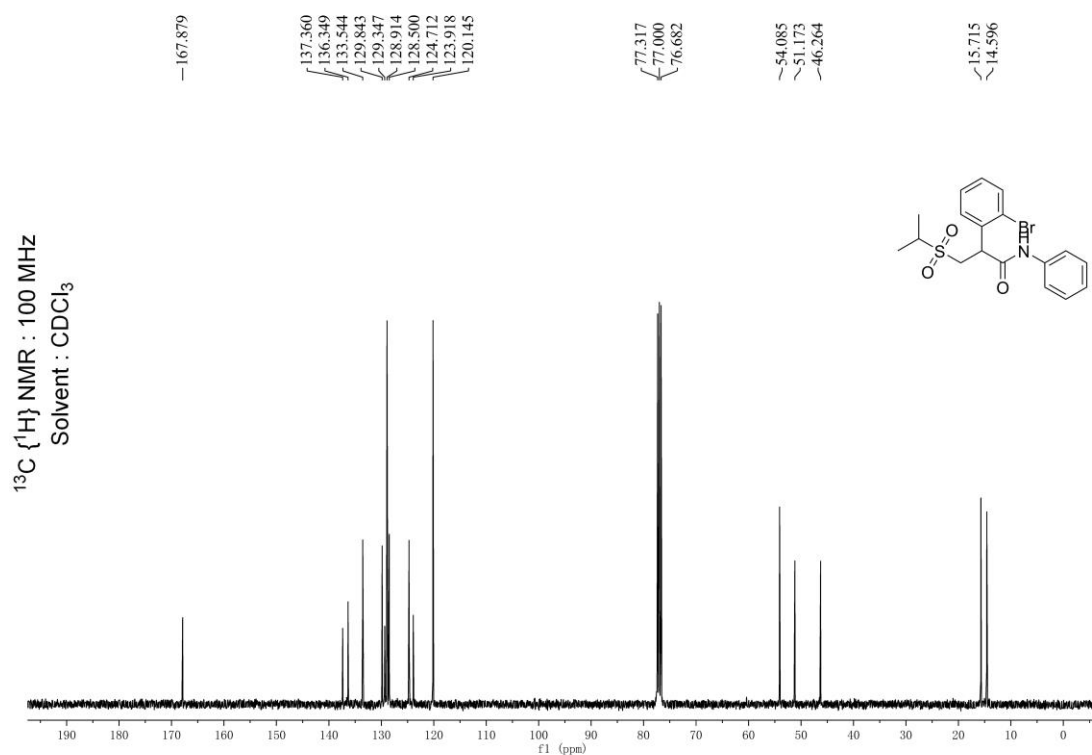

# 2-(2-bromophenyl)-3-(isopropylsulfonyl)-*N*,2-diphenylpropanamide

(5ua)

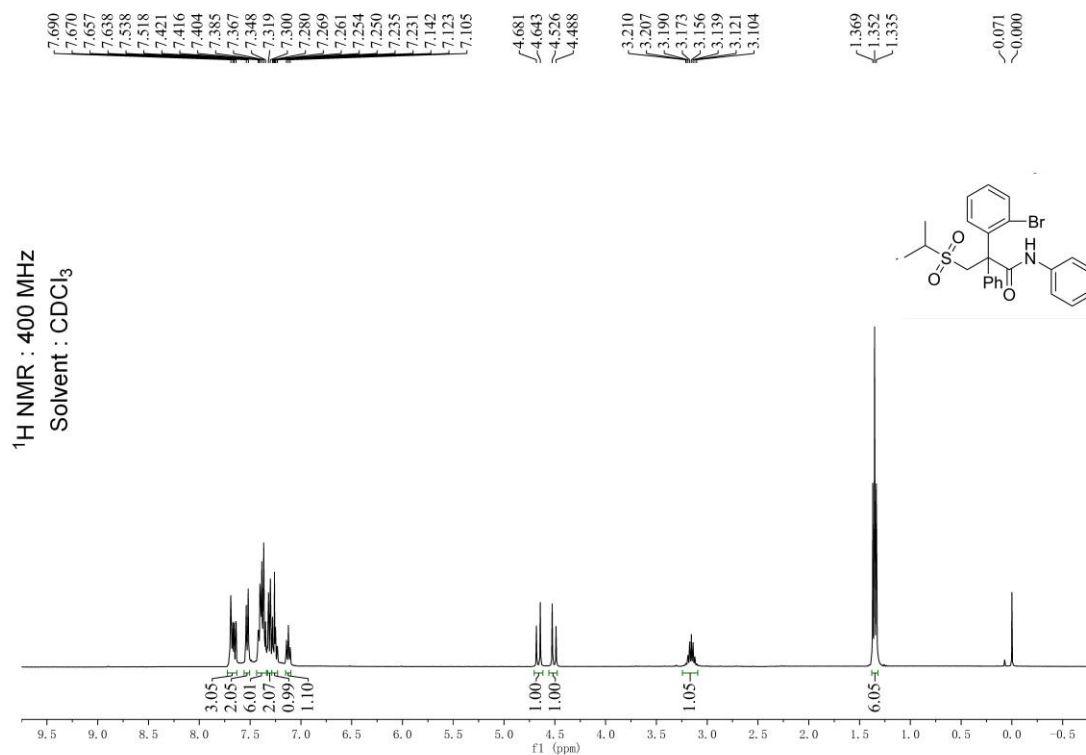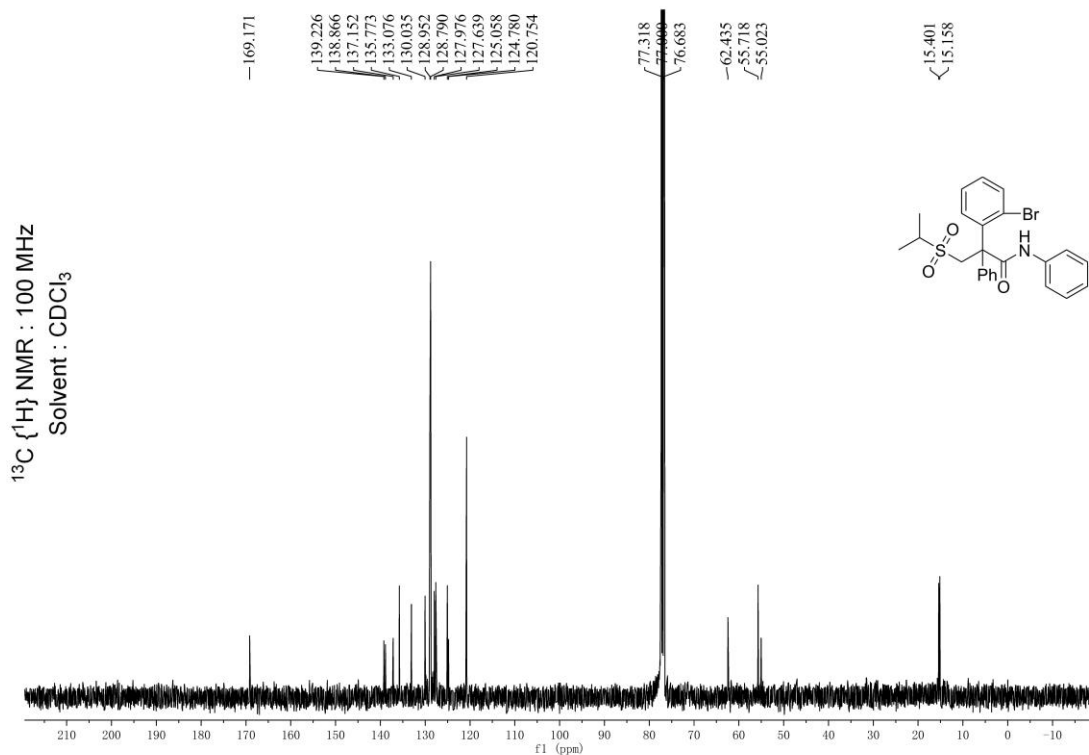



### 3-(isopropylsulfonyl)-2-methyl-N-phenyl-2-(thiophen-2-yl)propanamide(5wa)

<sup>1</sup>H NMR : 400 MHz  
Solvent : CDCl<sub>3</sub>

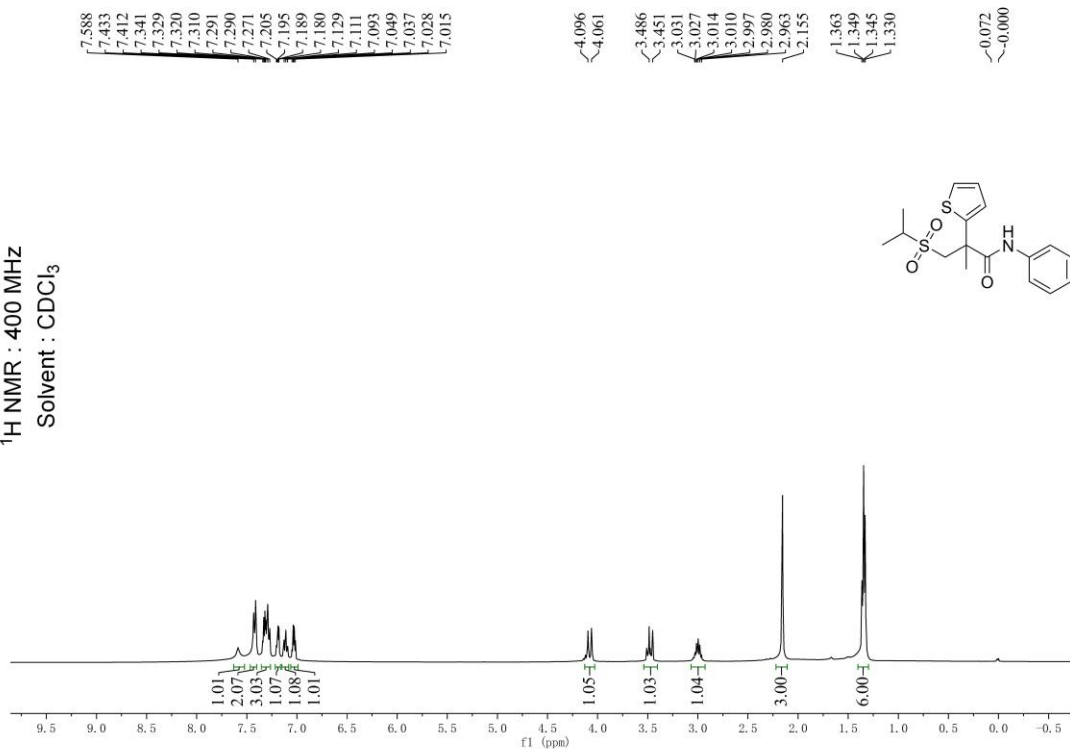

<sup>13</sup>C {<sup>1</sup>H} NMR : 100 MHz  
Solvent : CDCl<sub>3</sub>

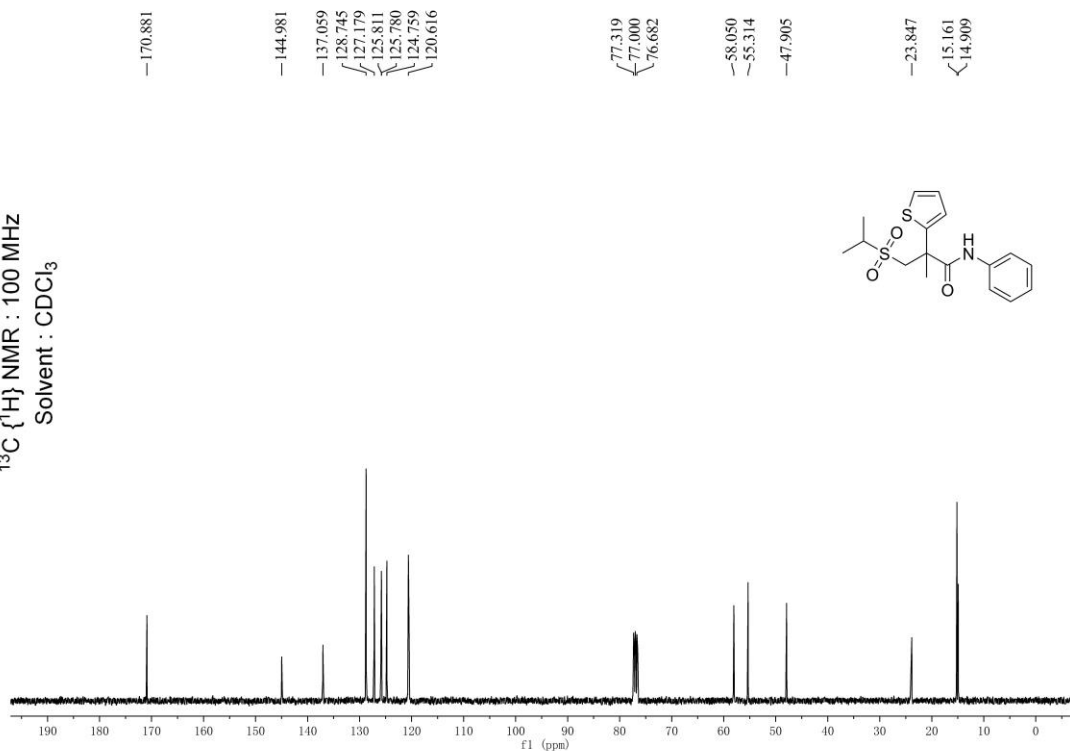

**2-(2-bromophenyl)-3-(isopropylsulfonyl)-2-methyl-N-(quinolin-8-yl)propanamide (5xa)**

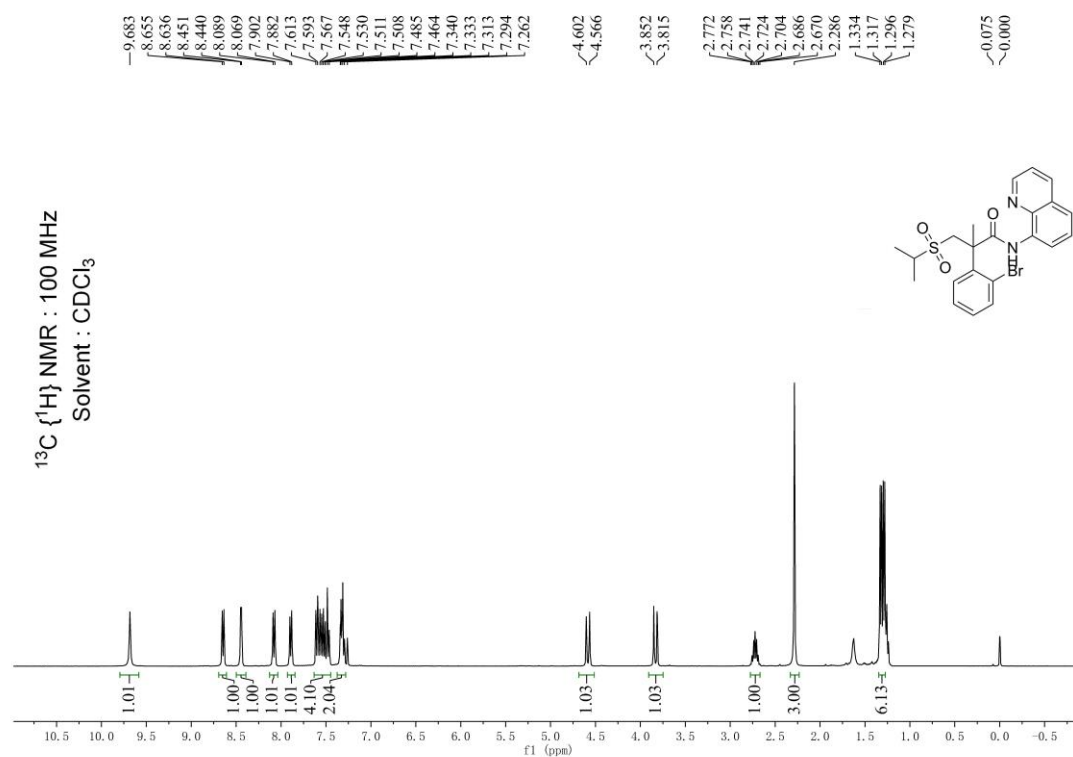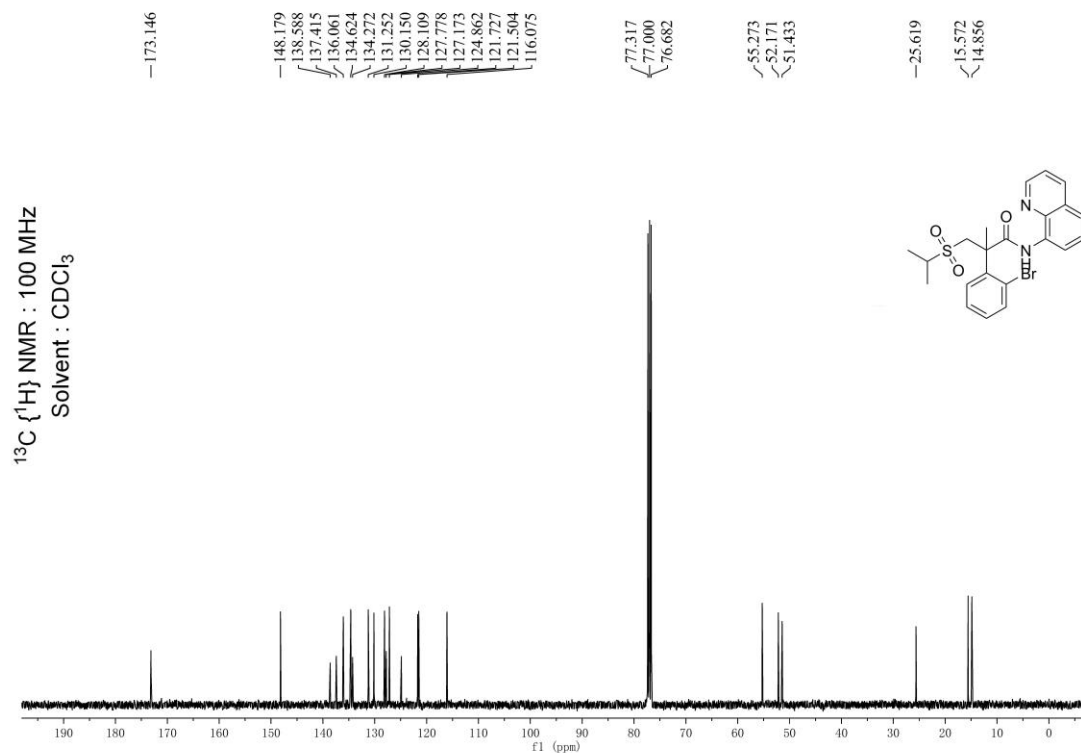

**2-(2-bromophenyl)-3-(sec-butylsulfonyl)-2-methyl-N-phenylpropanamide (5ab)**

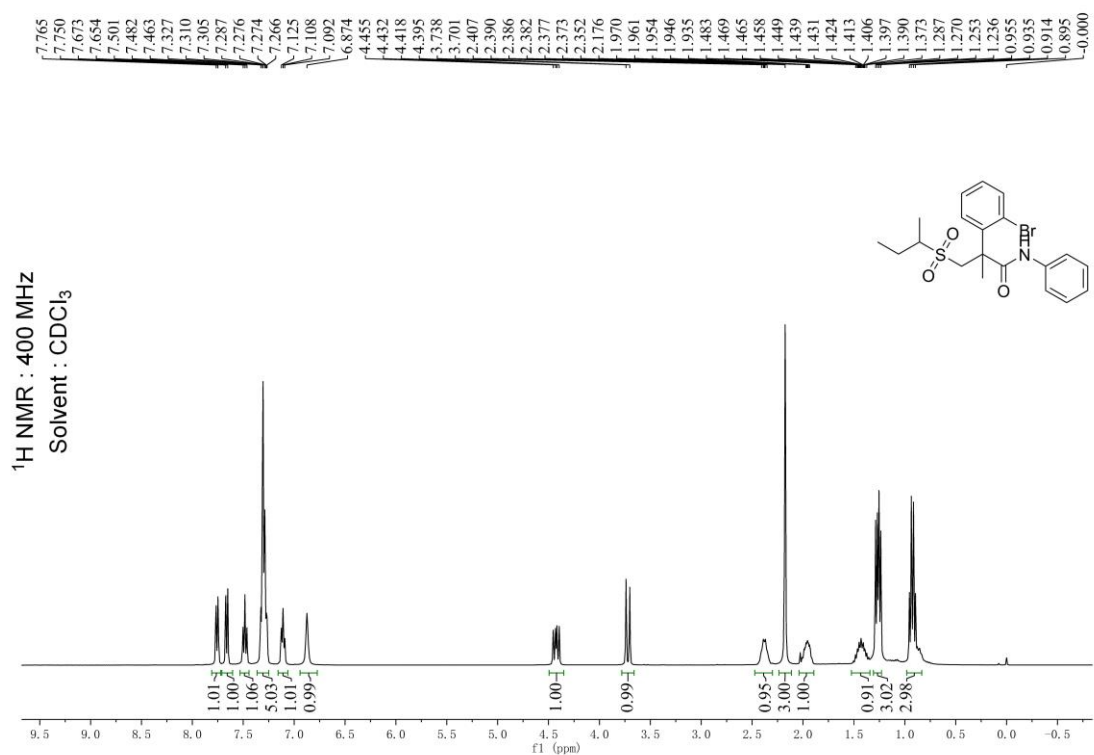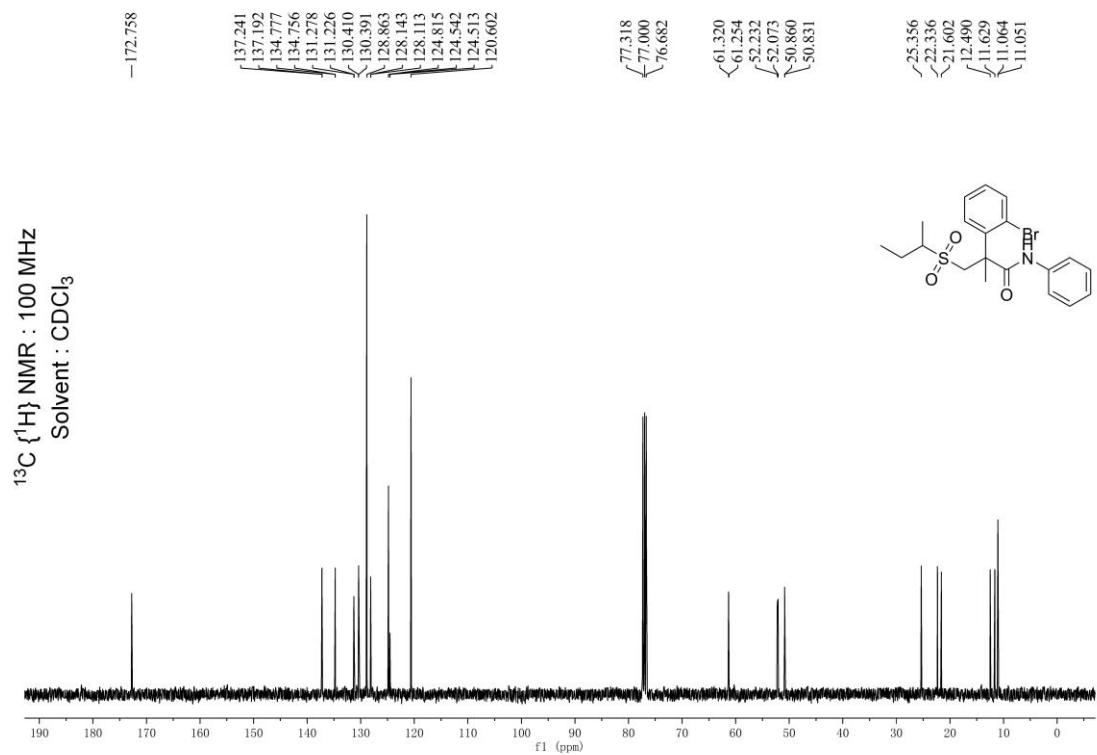

**3-((1-(benzo[d][1,3]dioxol-5-yl)propan-2-yl)sulfonyl)-2-(2-bromophenyl)-2-methyl-N-phenylpropanamide (5ac)**

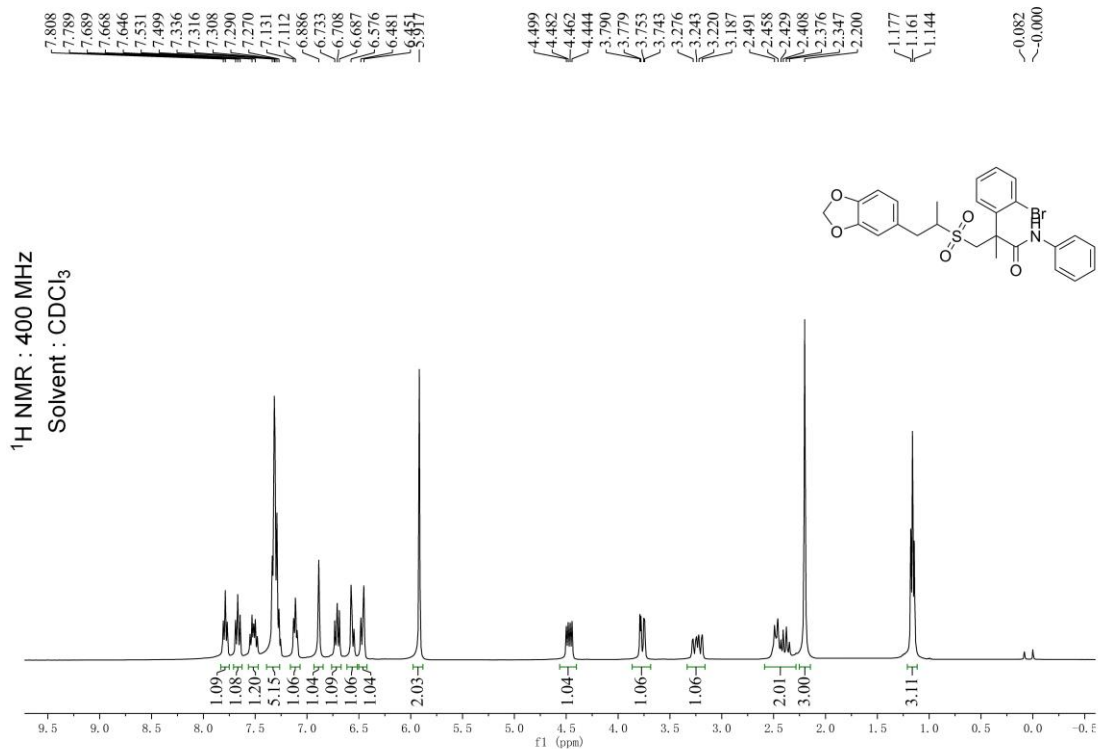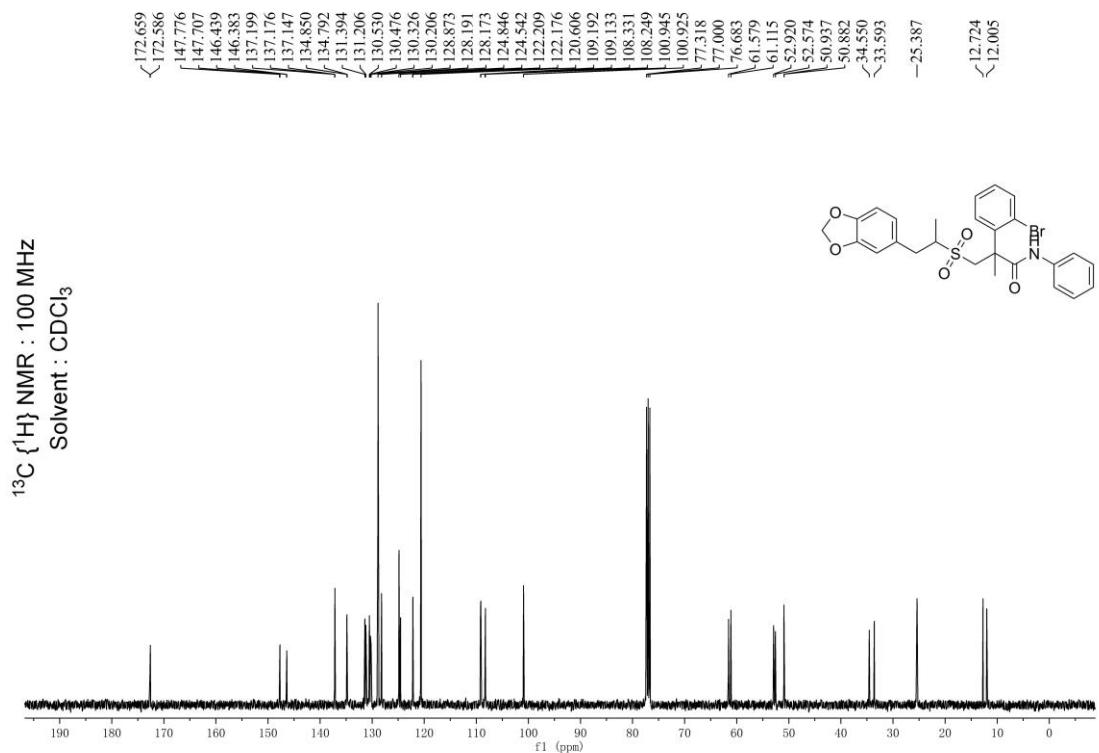

## 2-(2-bromophenyl)-3-(heptan-3-ylsulfonyl)-2-methyl-N-phenylpropanamide (5ad)

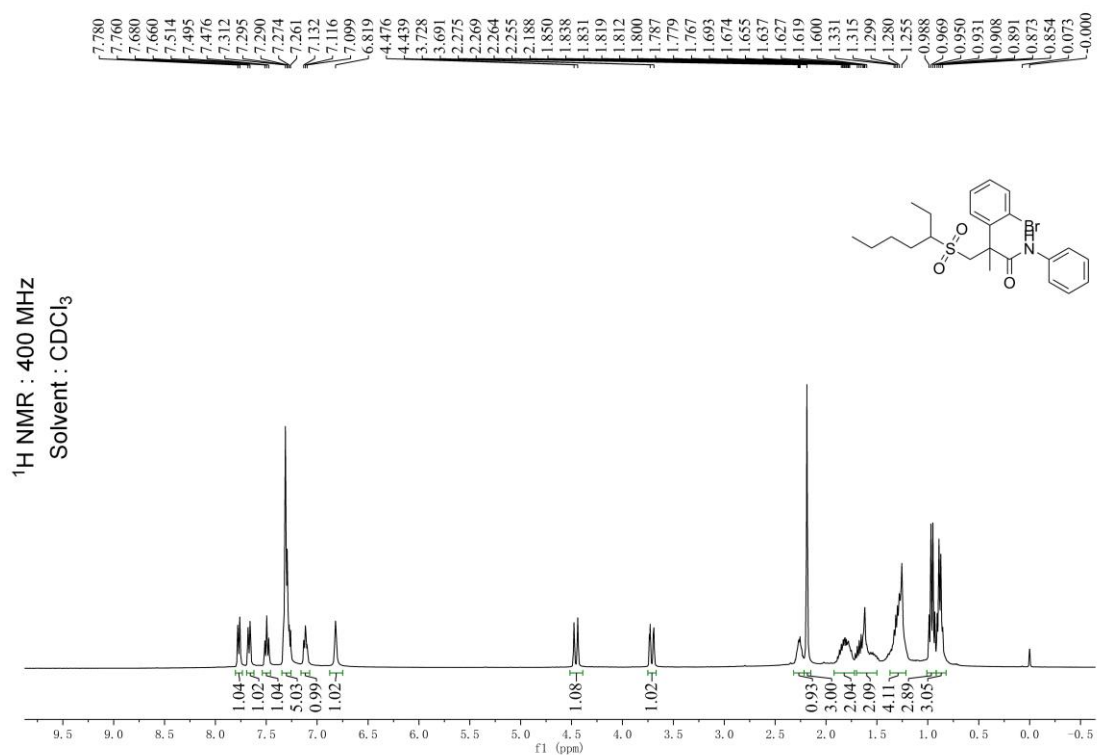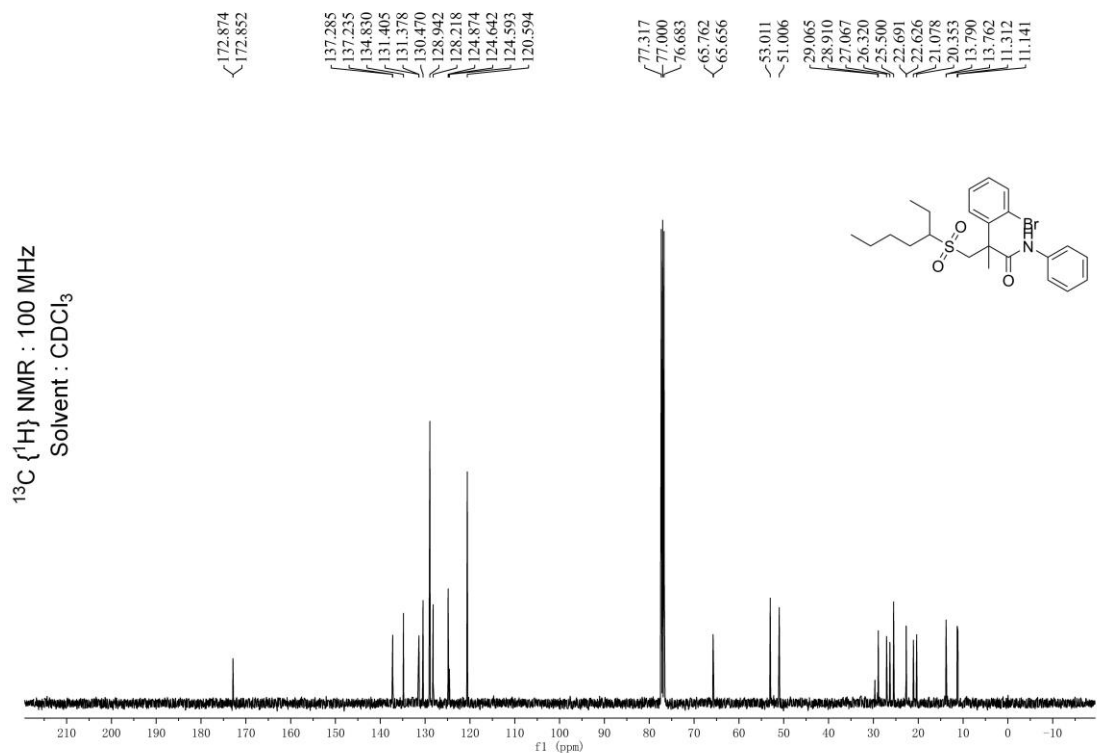

## 2-(2-bromophenyl)-3-(cyclopentylsulfonyl)-2-methyl-N-phenylpropanamide (5ae)

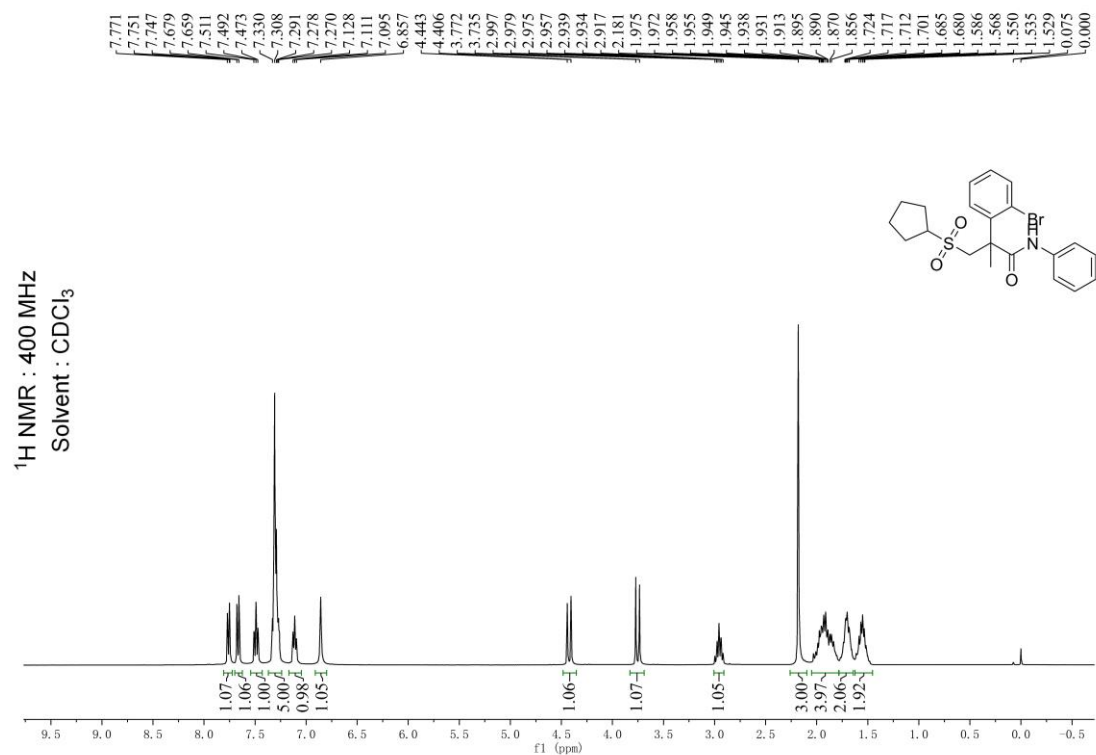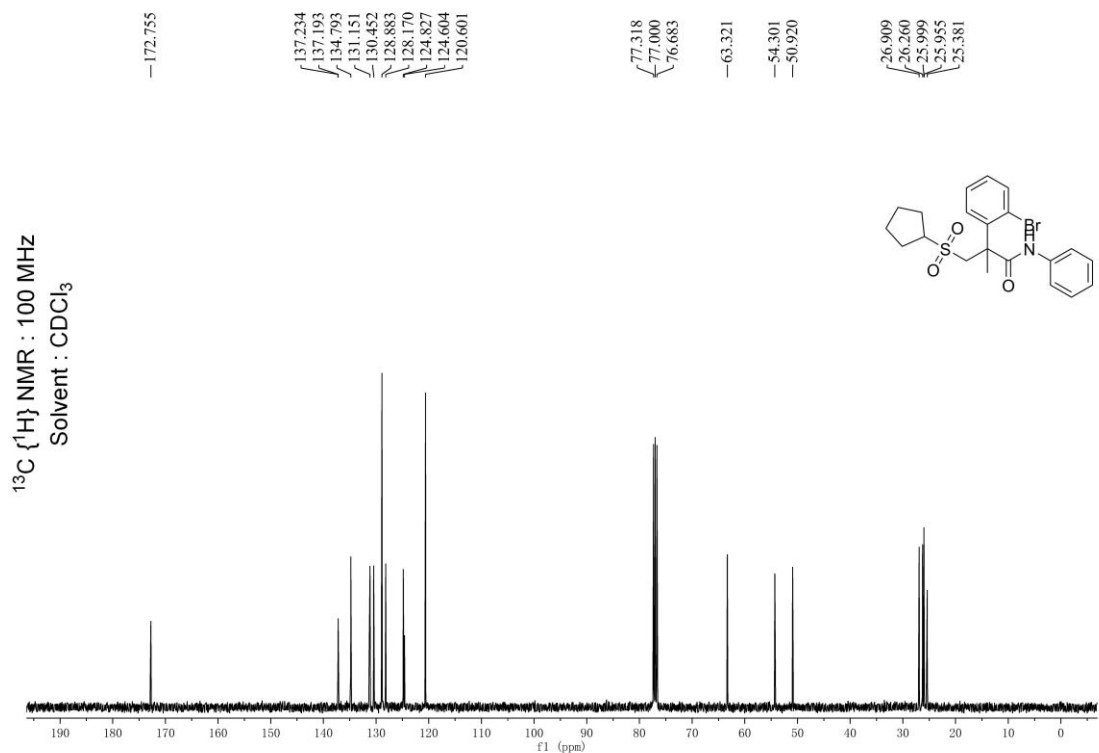

## 2-(2-bromophenyl)-3-(cyclohexylsulfonyl)-2-methyl-N-phenylpropanamide (5af)

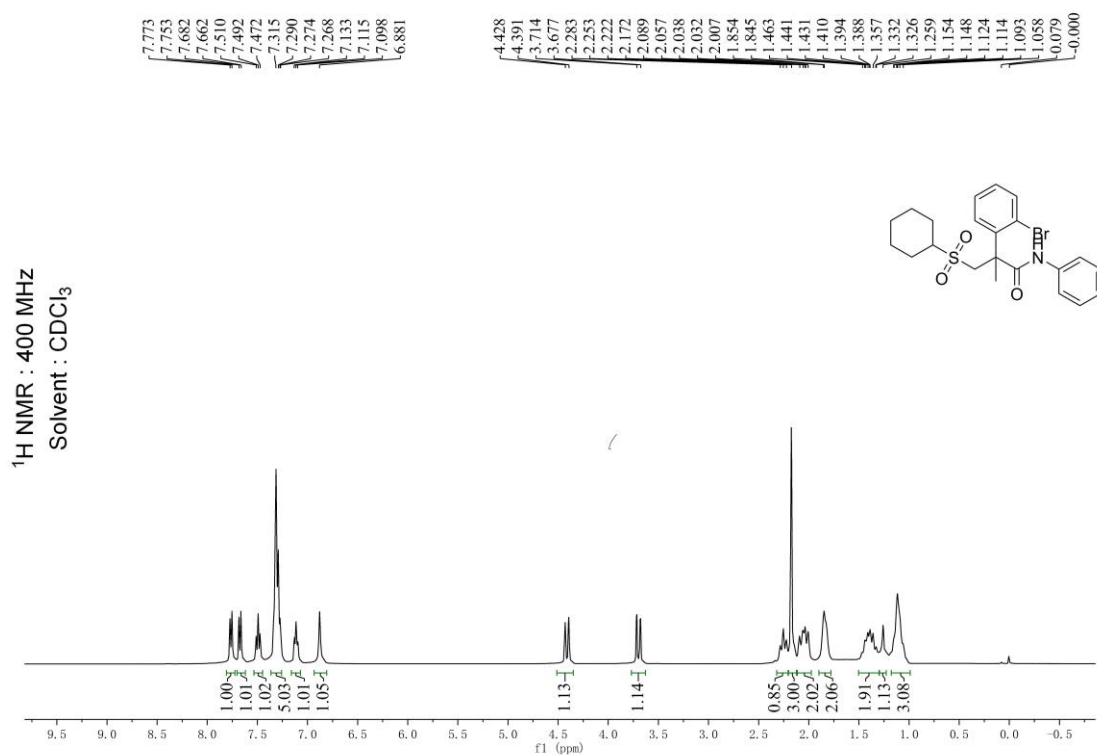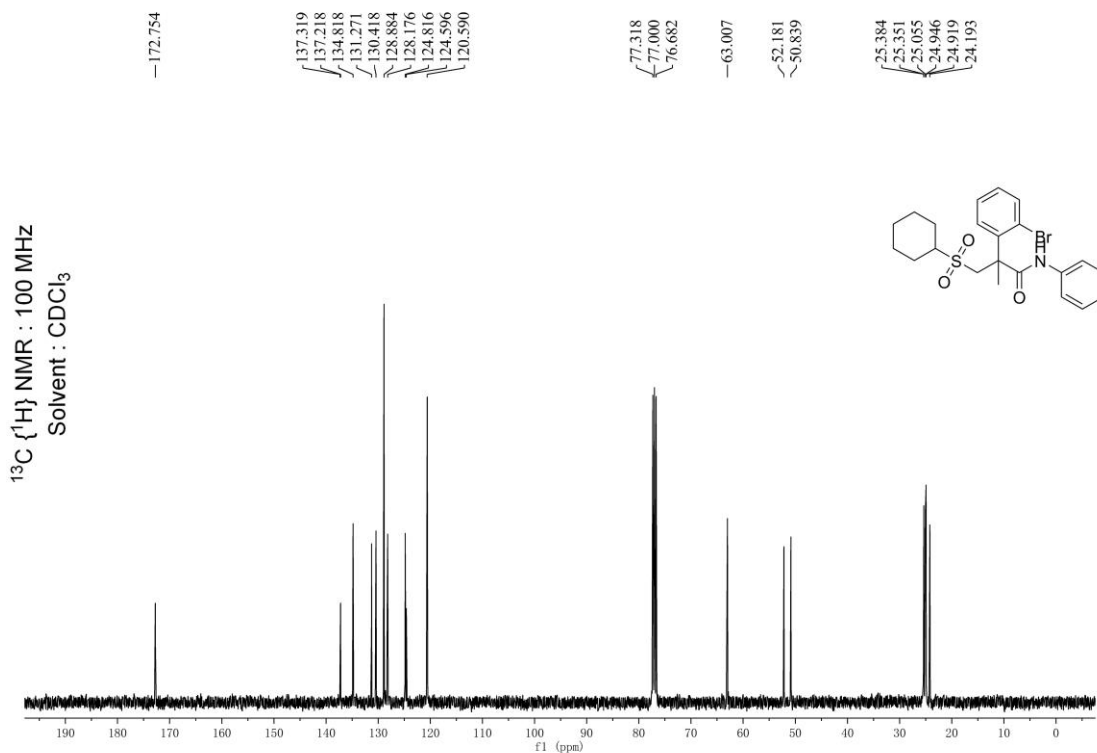

## 2-(2-bromophenyl)-3-(cyclohex-3-en-1-ylsulfonyl)-2-methyl-N-phenylpropanamide (5ag)

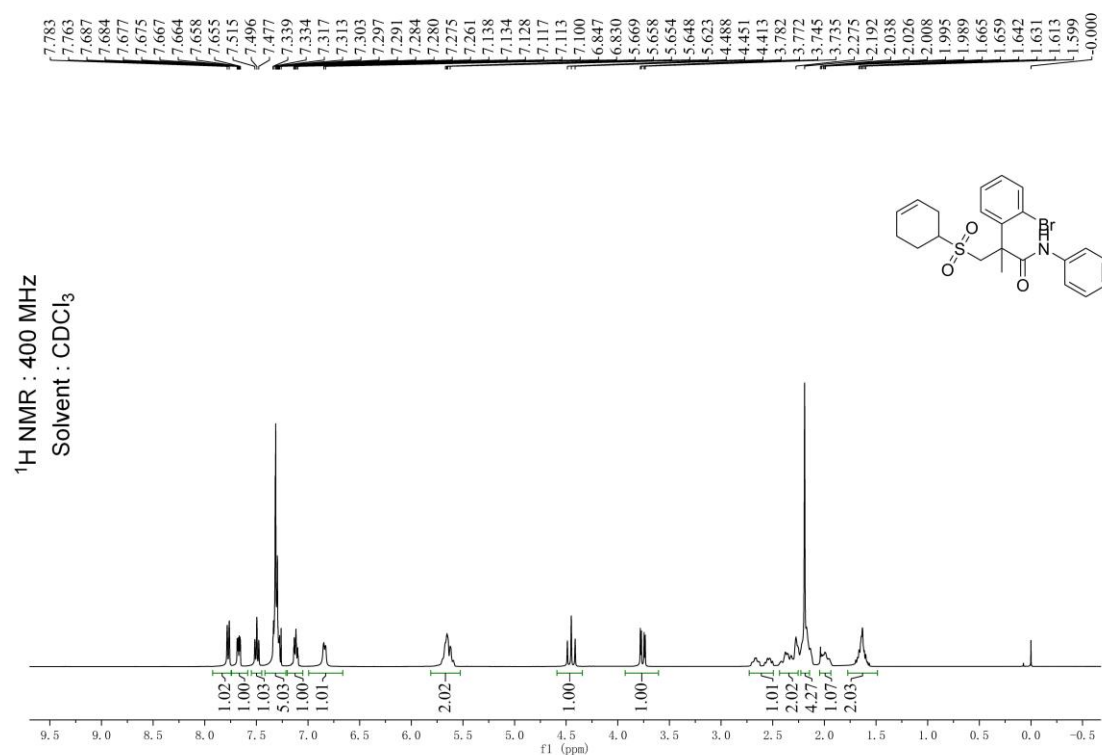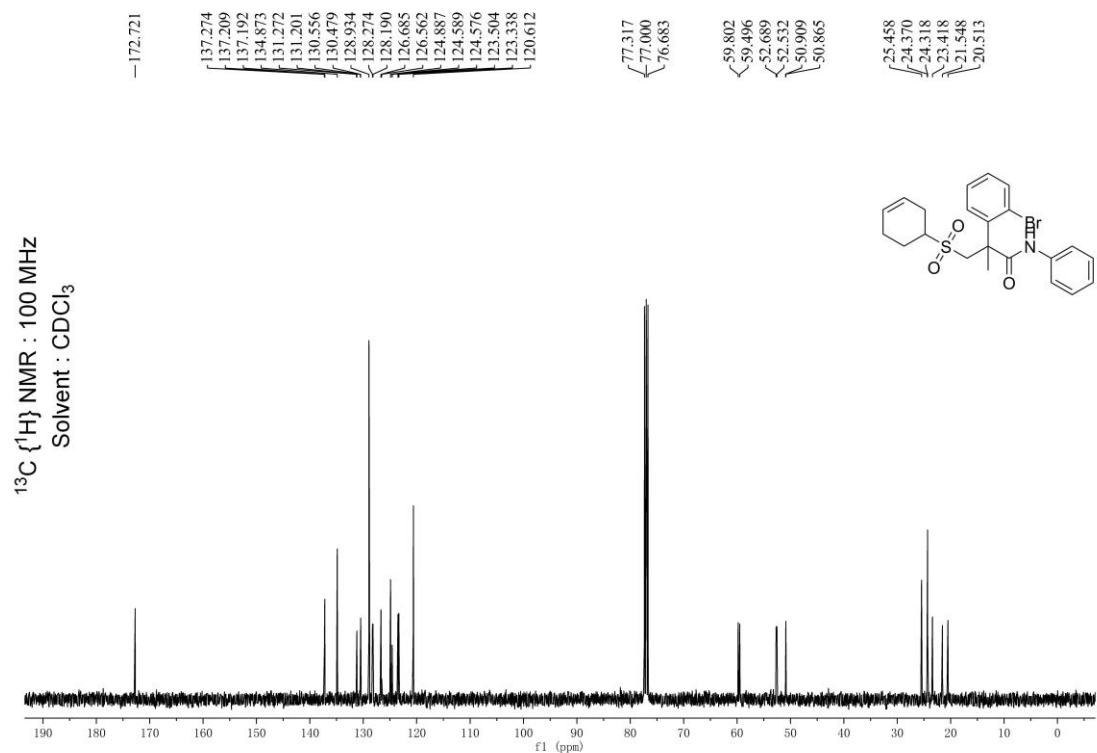



**2-(2-bromophenyl)-3-((1-(2-(tert-butoxy)acetyl)piperidin-4-yl)sulfonyl)-2-methyl-N-phenylpropanamide (5ah)**

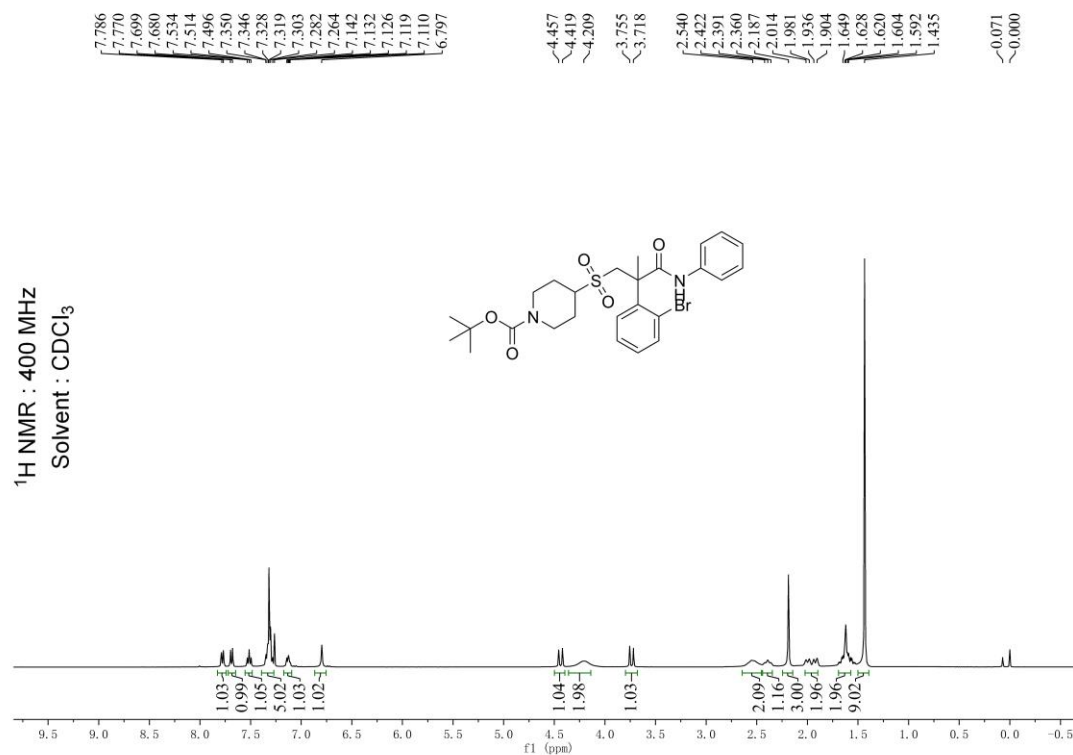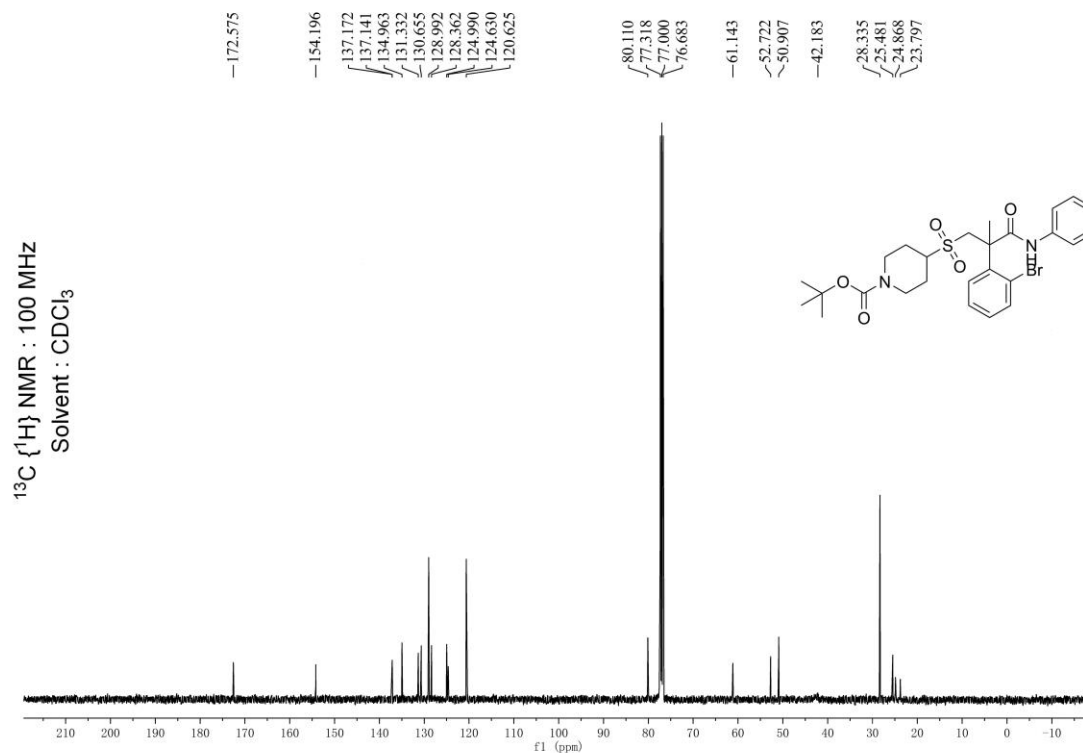

# 3-(2-bromophenyl)-3-(ethylsulfonyl)-2-methyl-N-phenylpropanamide

(5ai)

<sup>1</sup>H NMR : 400 MHz  
Solvent : CDCl<sub>3</sub>

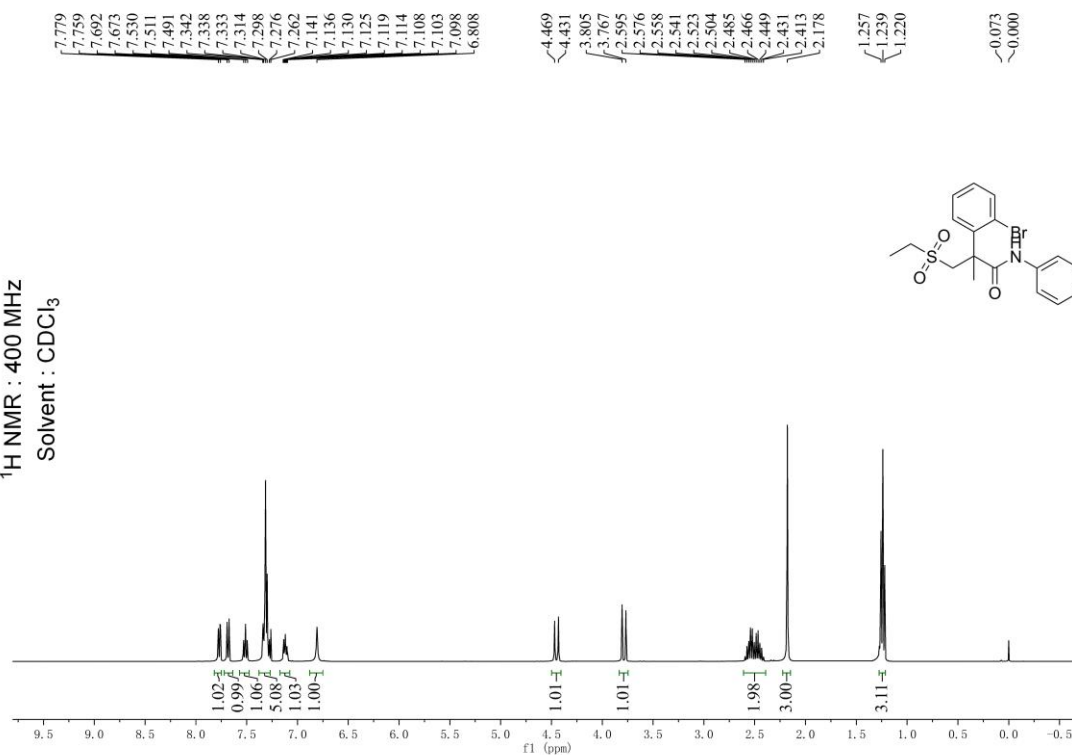

<sup>13</sup>C {<sup>1</sup>H} NMR : 100 MHz  
Solvent : CDCl<sub>3</sub>

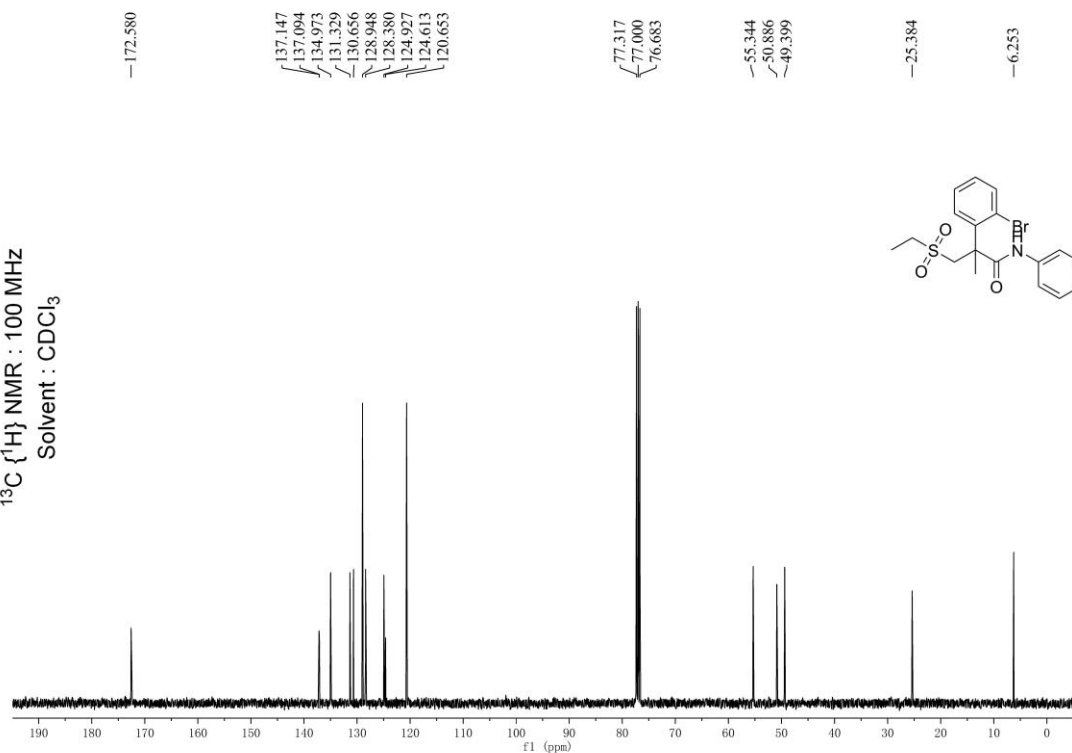

**2-(2-bromophenyl)-2-methyl-N-phenyl-3-(propylsulfonyl)propanamide (5aj)**

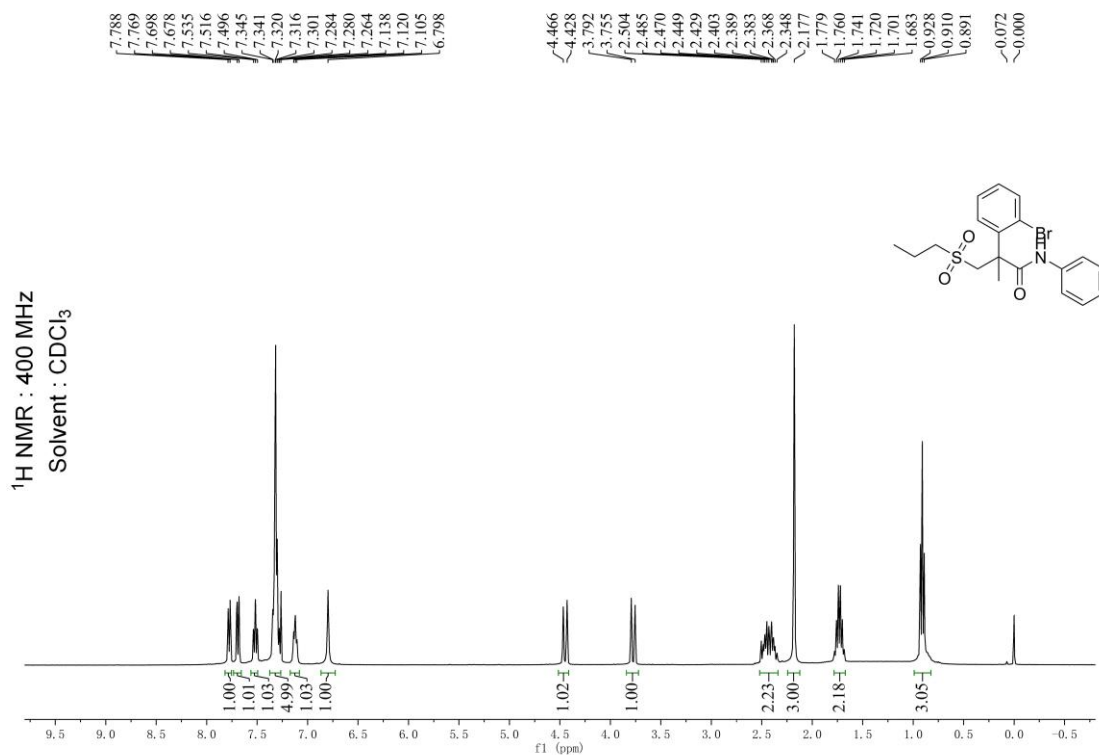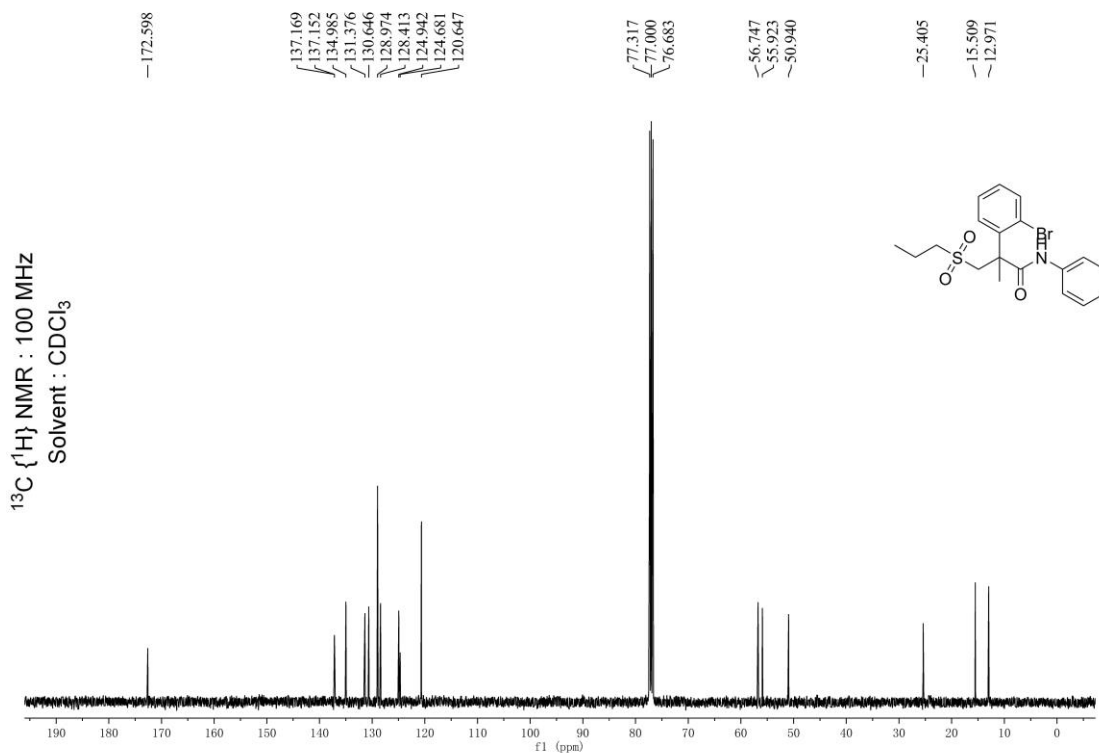

# 2-(2-bromophenyl)-3-(butylsulfonyl)-2-methyl-N-phenylpropanamide

(5ak)

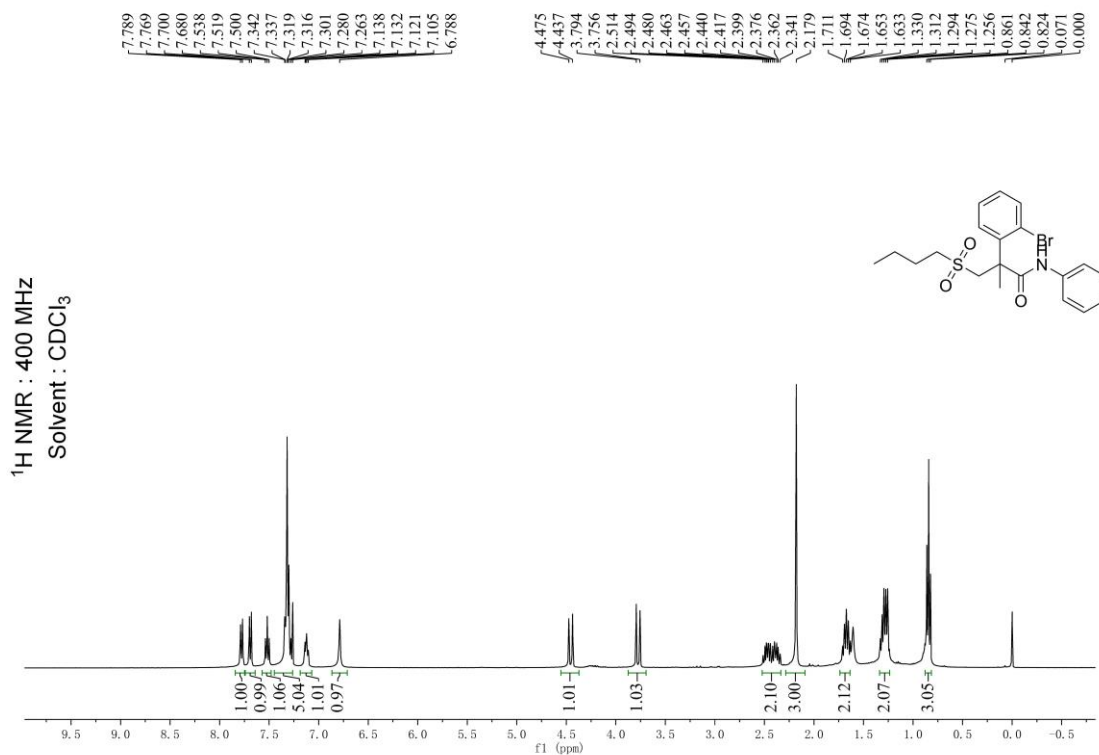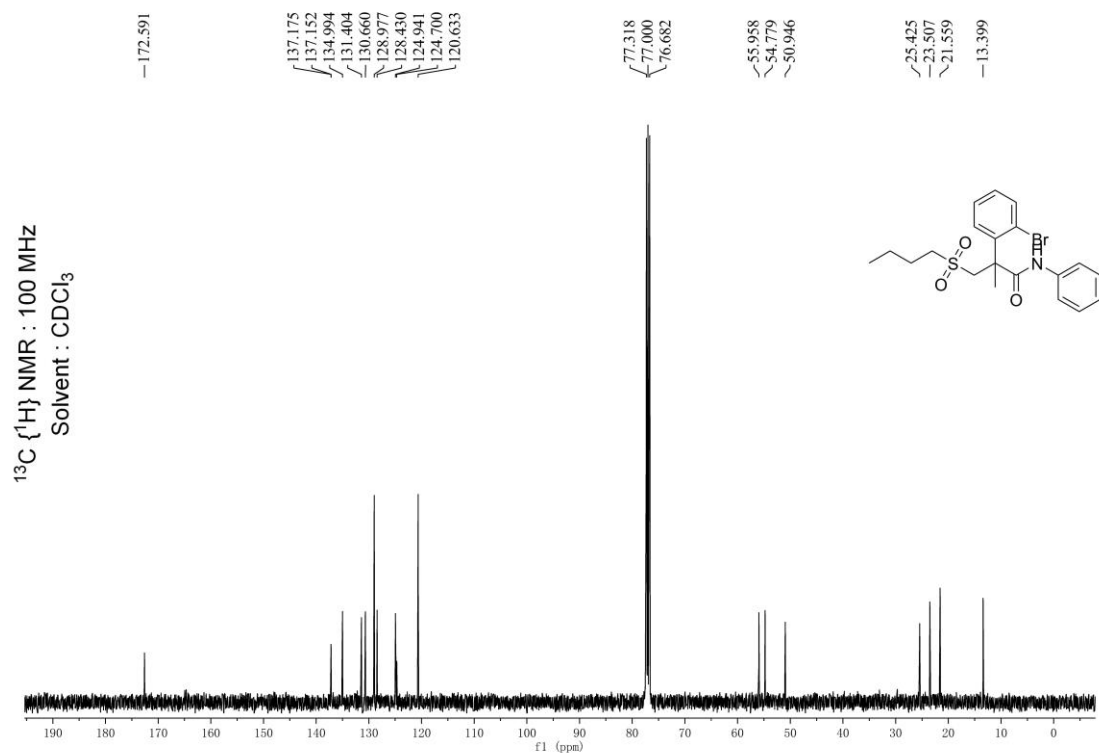

### 3-(2-bromophenyl)-2-methyl-3-(pentylsulfonyl)-N-phenylpropanamide (5a)

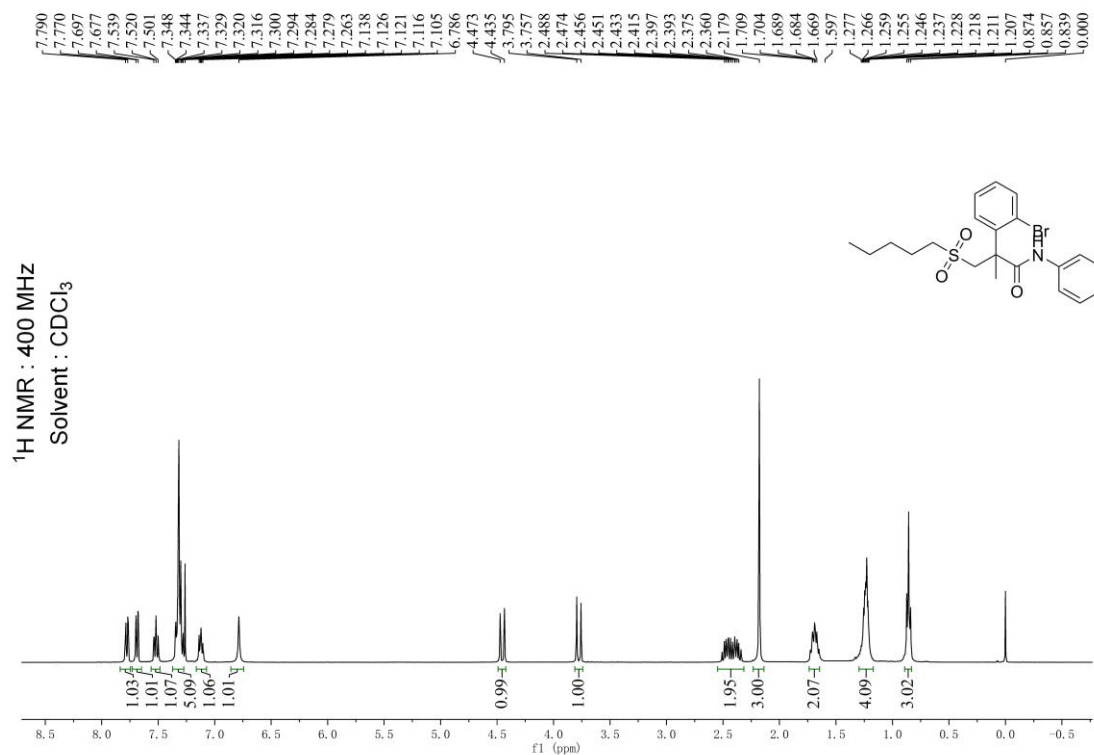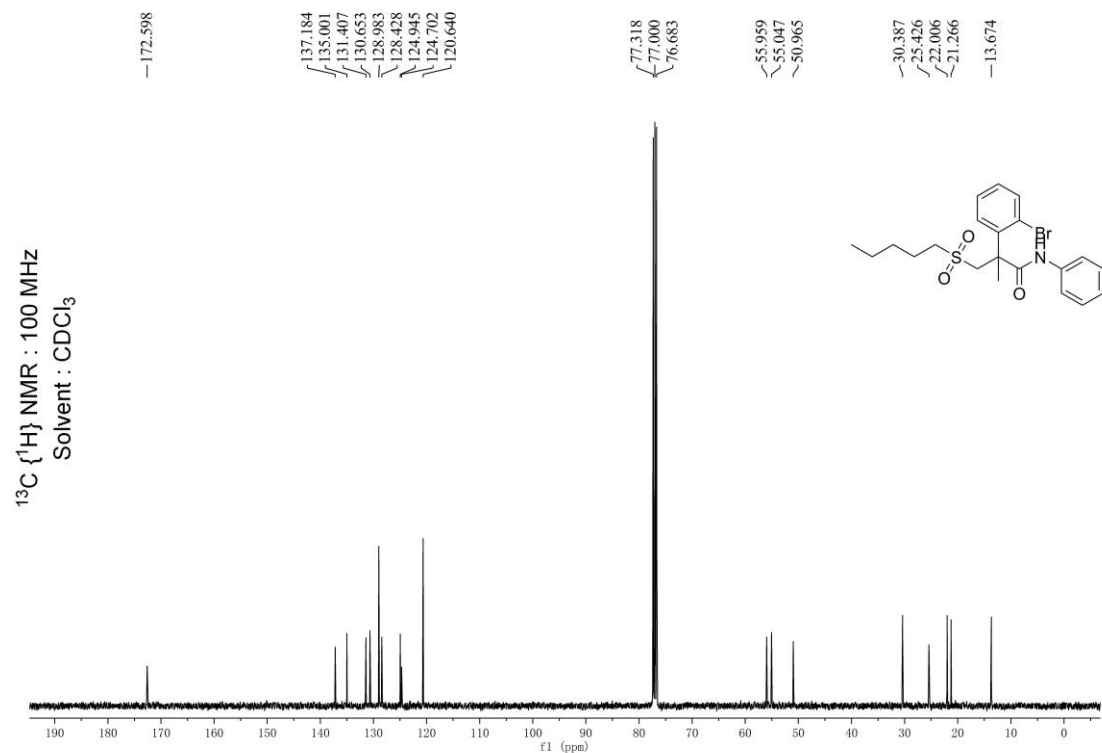

## 2-(2-bromophenyl)-3-(hexylsulfonyl)-2-methyl-N-phenylpropanamide (5am)

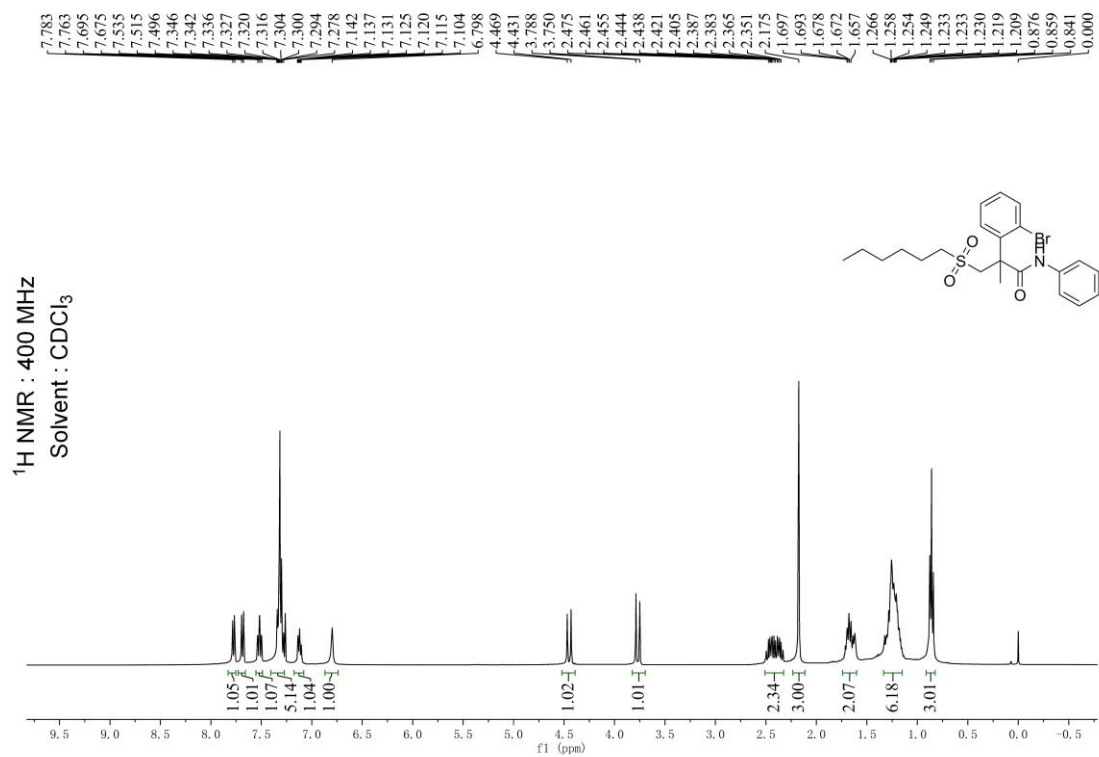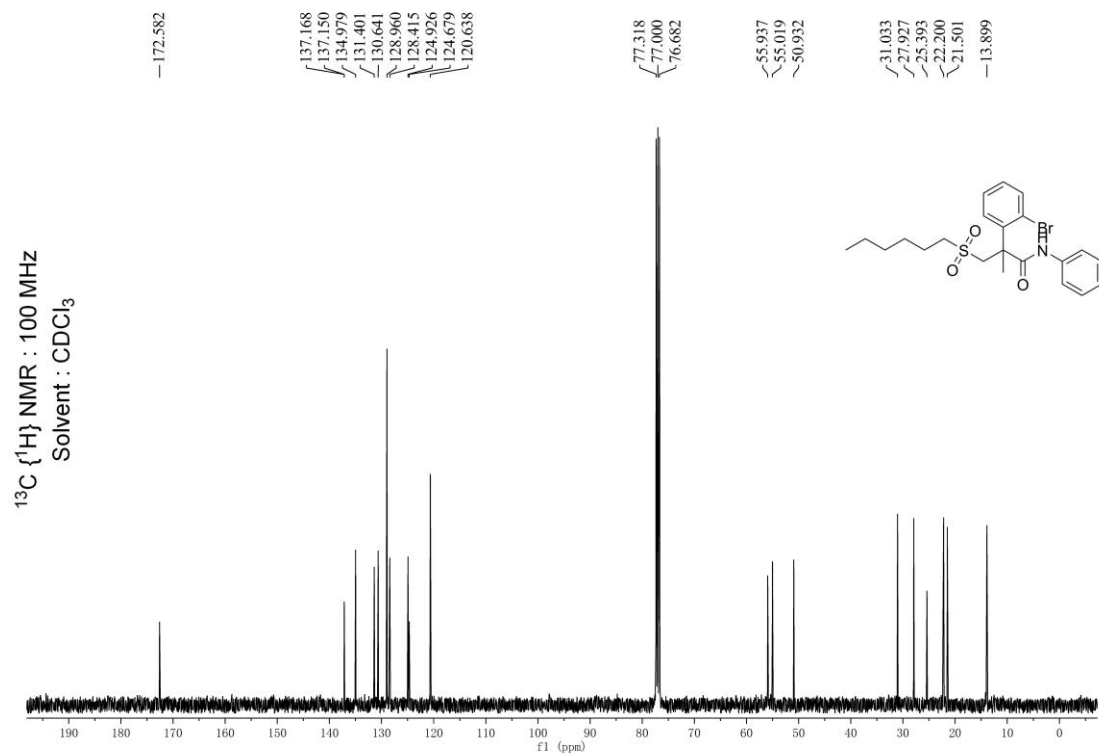

### 3-(2-bromophenyl)-2-methyl-3-(phenethylsulfonyl)-N-phenylpropanamide (5an)

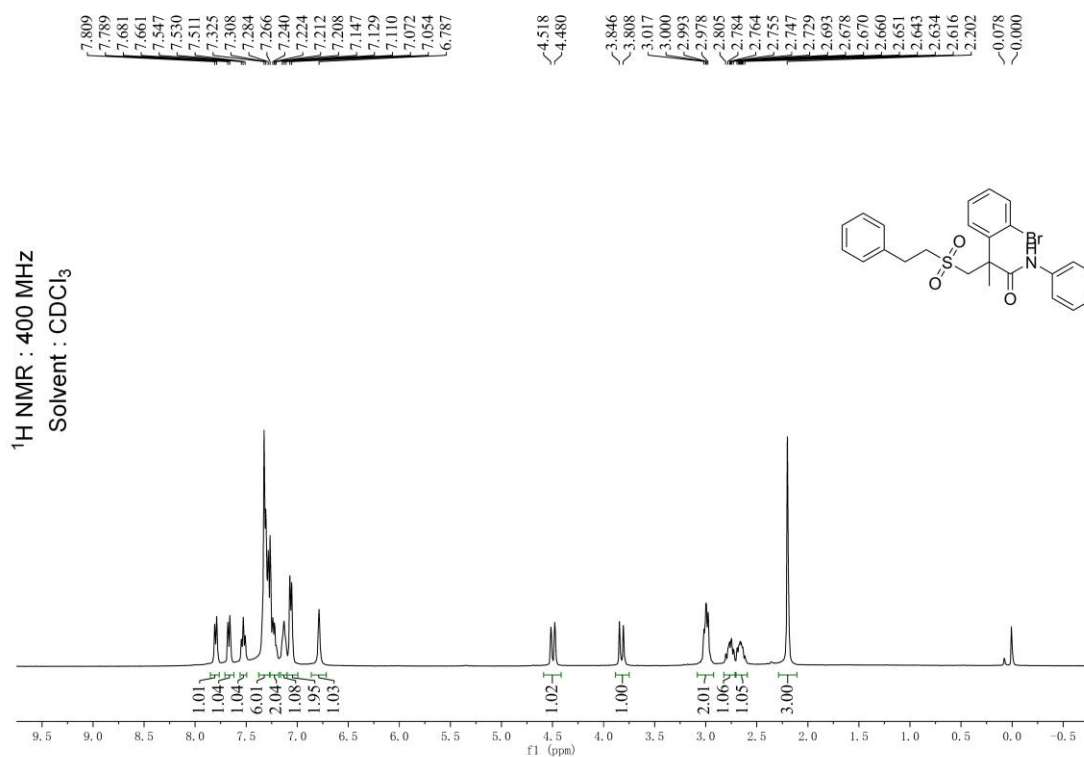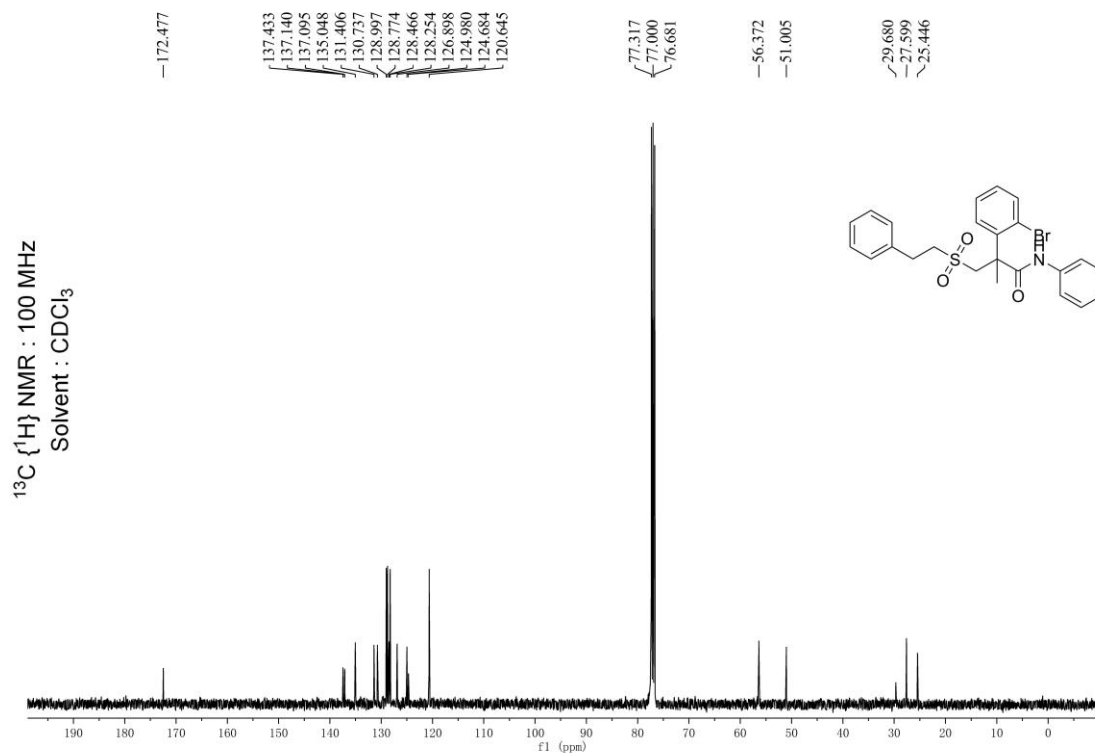

Supplement: d4gc00186a1.pdf [file d4gc00186a1.pdf]
